1  
2  
3  
4  
5  
6  
7  
8  
9  
10  
11  
12  
13  
14  
15  
16  
17  
18  
19

**Mutations of the YidC Insertase alleviate stress  
from  $\sigma^M$ -dependent membrane protein overproduction in *Bacillus subtilis***

**Short Title: Gain of function mutations in the YidC membrane insertase**

**Heng Zhao<sup>1#a</sup>, Ankita J. Sachla<sup>1</sup>, and John D. Helmann<sup>1\*</sup>**

<sup>1</sup> Department of Microbiology, Cornell University, Ithaca, NY, USA 14853-8101

<sup>#a</sup> Current Address: Department of Microbial Pathogenesis, Yale University School of Medicine,  
New Haven, Connecticut, USA.

\* Corresponding author

E-mail: [jdh9@cornell.edu](mailto:jdh9@cornell.edu) (JDH)

Co-author emails: [h2285@cornell.edu](mailto:h2285@cornell.edu), [ajs588@cornell.edu](mailto:ajs588@cornell.edu)

## 20 **Abstract**

21 In *Bacillus subtilis*, the extracytoplasmic function  $\sigma$  factor  $\sigma^M$  regulates cell wall synthesis and is  
22 critical for intrinsic resistance to cell wall targeting antibiotics. The anti- $\sigma$  factors YhdL and YhdK  
23 form a complex that restricts the basal activity of  $\sigma^M$ , and the absence of YhdL leads to runaway  
24 expression of the  $\sigma^M$  regulon and cell death. Here, we report that this lethality can be suppressed  
25 by gain-of-function mutations in *spoIIIJ*, which encodes the major YidC membrane protein  
26 insertase in *B. subtilis*. *B. subtilis* PY79 SpoIIIJ contains a single amino acid substitution in the  
27 substrate-binding channel (Q140K), and this allele suppresses the lethality of high SigM. Analysis  
28 of a library of YidC variants reveals that increased charge (+2 or +3) in the substrate-binding  
29 channel can compensate for high expression of the  $\sigma^M$  regulon. Derepression of the  $\sigma^M$  regulon  
30 induces secretion stress, oxidative stress and DNA damage responses, all of which can be  
31 alleviated by the YidC<sup>Q140K</sup> substitution. We further show that the fitness defect caused by high  $\sigma^M$   
32 activity is exacerbated in the absence of SecDF protein translocase or  $\sigma^M$ -dependent induction of  
33 the Spx oxidative stress regulon. Conversely, cell growth is improved by mutation of specific  $\sigma^M$ -  
34 dependent promoters controlling operons encoding integral membrane proteins. Collectively,  
35 these results reveal how the  $\sigma^M$  regulon has evolved to up-regulate membrane-localized complexes  
36 involved in cell wall synthesis, and to simultaneously counter the resulting stresses imposed by  
37 regulon induction.

38

## 39 **Author Summary**

40 Bacteria frequently produce antibiotics that inhibit the growth of competitors, and many naturally  
41 occurring antibiotics target cell wall synthesis. In *Bacillus subtilis*, the alternative  $\sigma$  factor  $\sigma^M$  is  
42 induced by cell wall antibiotics, and upregulates genes for peptidoglycan and cell envelope

43 synthesis. However, dysregulation of the  $\sigma^M$  regulon, resulting from loss of the YhdL anti- $\sigma^M$   
44 protein, is lethal. We here identify charge variants of the SpoIIIJ(YidC) membrane protein  
45 insertase that suppress the lethal effects of high  $\sigma^M$  activity. Further analyses reveal that induction  
46 of the  $\sigma^M$  regulon leads to high level expression of membrane proteins that trigger envelope stress,  
47 and this stress is countered by specific genes in the  $\sigma^M$  regulon.

48

## 49 **Introduction**

50 The ability of cells to adapt to changing conditions relies in large part on the expression of  
51 specific stress responses controlled by transcription regulators. The extracytoplasmic function  
52 (ECF) subfamily of  $\sigma$  factors are frequently involved in bacterial responses to stresses affecting  
53 the cell envelope [1, 2]. In *Bacillus subtilis*, there are seven ECF  $\sigma$  factors with the  $\sigma^M$  regulon  
54 playing a particularly important role in modulating pathways involved in peptidoglycan synthesis,  
55 cell envelope stress responses, and intrinsic resistance to antibiotics [3]. Cells lacking  $\sigma^M$  (*sigM*  
56 null mutants) grow normally in unstressed conditions, but have greatly increased sensitivity to  
57 high salt and to cell wall active antibiotics, including  $\beta$ -lactams and moenomycin [4-6].

58 Like many other ECF  $\sigma$  factors, the activity of  $\sigma^M$  is regulated by two membrane-localized  
59 anti- $\sigma$  factors encoded as part of the *sigM* operon, *sigM-yhdL-yhdK* [7, 8]. The major anti- $\sigma$  factor  
60 is YhdL, a transmembrane protein that directly binds  $\sigma^M$  [9]. However, full YhdL activity requires  
61 a second transmembrane protein YhdK. Although a lack of  $\sigma^M$  is well tolerated under unstressed  
62 conditions, the lack of the anti- $\sigma^M$  factors leads to a runaway activation of the autoregulated *sigM*  
63 operon, and overexpression of the  $\sigma^M$  regulon [10]. A null mutation of *yhdK* leads to an ~100-fold  
64 elevation of  $\sigma^M$  activity, morphological abnormalities, and slow growth [10]. A null mutation in  
65 *yhdL* is lethal, but suppressors arise readily that have inactivated *sigM* and grow normally in

66 unstressed conditions [4, 10]. These findings imply that high level expression of  $\sigma^M$  is toxic to  
67 cells, but the basis for this toxicity has not been defined.

68         Previously, we explored the basis for  $\sigma^M$  toxicity by selecting for suppression of *yhdL*  
69 lethality in a *sigM* merodiploid strain to reduce the frequency of suppressors that had inactivated  
70  $\sigma^M$ . These studies led to the recovery of mutations in *rpoB* and *rpoC*, encoding the  $\beta$  and  $\beta'$  subunits  
71 of RNA polymerase, that led to a reduction of  $\sigma^M$  activity sufficient to restore viability [10]. These  
72 mutations, which acted selectively on  $\sigma^M$ , affected a region of core RNA polymerase involved in  
73  $\sigma$  factor binding. In the course of these studies we also demonstrated that the toxicity from high  $\sigma^M$   
74 could be alleviated by mutation of the autoregulatory promoter for the *sigM* operon, or by  
75 overexpression of the housekeeping  $\sigma$  factor,  $\sigma^A$  [10]. These results suggest that the lack of a  
76 functional anti- $\sigma^M$  factor (*yhdL* null mutant) leads to runaway activation of the *sigM* operon and a  
77 high level of  $\sigma^M$  activity that is incompatible with growth. However, it is unclear whether  $\sigma^M$   
78 toxicity results from a decrease in activity of the essential housekeeping  $\sigma^A$ , overexpression of one  
79 or more  $\sigma^M$ -regulated genes, or both.

80         To further explore the impact of overexpression of specific  $\sigma^M$ -regulated genes on cell  
81 physiology we generated a library of strains in which specific  $\sigma^M$ -dependent promoters ( $P_M$ ) are  
82 inactivated by point mutations. This approach, which removes  $\sigma^M$ -dependent activation while  
83 leaving other promoters and regulatory inputs intact, is important since many  $\sigma^M$ -regulated genes  
84 have multiple promoters and encode essential genes, including several involved in peptidoglycan  
85 synthesis and cell division [3]. In the course of developing this library we received a previously  
86 described strain with a mutation inactivating the  $P_M$  of *rodA*, encoding a SEDS family  
87 transglycosylase important for peptidoglycan synthesis [6]. We unexpectedly discovered that in  
88 this strain *yhdL* could be inactivated, and the same was true for the parent strain (*B. subtilis* PY79).



89 These serendipitous observations led us to hypothesize that *B. subtilis* PY79 differs from other *B.*  
90 *subtilis* 168 strains in its ability to tolerate high level expression of the  $\sigma^M$  regulon.

91 Here, we report that the ability of *B. subtilis* PY79 to tolerate  $\sigma^M$  regulon overexpression  
92 results from a single amino acid substitution in the *spoIIIJ* gene, which encodes the major YidC  
93 membrane insertase in *B. subtilis* [11, 12]. This finding motivated a detailed structure-function  
94 analysis of YidC, which led to the discovery of mutations that increase the positive charge within  
95 the hydrophilic, substrate-binding channel of YidC from +1 (wild-type) to +2 or +3 (in specific  
96 combinations) increase tolerance to overexpression of  $\sigma^M$ -regulated membrane proteins.  
97 Moreover, high level activity of  $\sigma^M$  leads to induction of genes associated with secretion stress,  
98 oxidative stress, and DNA damage responses, and the  $\sigma^M$  regulon itself includes functions that help  
99 compensate for stresses associated with membrane protein overexpression.

100

## 101 **Results**

### 102 **A single amino acid change in SpoIIIJ necessary and sufficient for tolerance of high $\sigma^M$**

103 The anti- $\sigma$  factors YhdL and YhdK regulate  $\sigma^M$ , and the absence of *yhdL* is lethal in *B.*  
104 *subtilis* strain 168 due to toxic levels of  $\sigma^M$  [4, 10]. Since  $\sigma^M$  controls a large regulon, including  
105 many essential genes involved in cell wall synthesis [1, 3], we sought to construct a library of  
106 strains in which specific  $\sigma^M$ -dependent promoters are inactivated by point mutations. One such  
107 promoter precedes *rodA*, which encodes a peptidoglycan transglycosylase [6]. We thus acquired a  
108  $\Delta P_M$ -*rodA* strain (BAM1077[6]), and tested whether *yhdL* is essential in that strain background,  
109 with its parent wild type strain PY79 as a control. Surprisingly, we found that *yhdL* is not essential  
110 in either PY79 strain. A *yhdL* mutant in PY79 exhibits reduced colony size compared to WT and  
111 high  $\sigma^M$  activity as indicated by the blue color on LB plates containing X-Gal (Fig. 1a). This mutant

112 is relatively stable, with the occasional appearance of suppressors that have a large white colony  
113 morphology (likely containing mutations in *sigM*). In contrast, introduction of a *yhdL* null mutation  
114 into other *B. subtilis* 168 strains results in tiny, pinpoint colonies that cannot be re-streaked,  
115 consistent with prior work [4, 10].

116 To identify the genetic differences in PY79 that confer tolerance of high  $\sigma^M$ , we compared  
117 the genome between *B. subtilis* strain 168 and PY79. There are over a hundred single nucleotide  
118 polymorphisms (SNPs) between the 168 reference sequence and PY79, as well as four large  
119 deletions in the genome of PY79 (including the SP $\beta$  prophage), causing a reduction of 180 kb for  
120 the PY79 genome compared with 168 [13, 14]. To identify differences that might correlate with  
121 tolerance of high  $\sigma^M$  activity, we compared the sequences of genes encoding RNA polymerase  
122 subunits, and genes in the  $\sigma^M$  and Spx regulons (Spx is a transcription regulator that is regulated  
123 by  $\sigma^M$ ). However, no differences were noted in these 103 genes between the PY79 and 168  
124 reference genomes (Table S1).

125 Next, we used an unbiased, forward genetics approach to identify the mutation in PY79  
126 that suppresses the lethality of a *yhdL* null mutation. We used genomic DNA from a PY79  
127 *yhdL::kan* strain to transform 168 to kanamycin resistance, reasoning that the only viable  
128 transformants will likely also acquire the suppressing mutation. Because each competent cell of *B.*  
129 *subtilis* contains about 50 binding sites for DNA uptake, a competent cell can import multiple  
130 fragments of DNA during transformation in a process known as congression [15]. When a 168  
131 strain containing a P<sub>M</sub>-*lacZ* reporter was transformed with chromosomal DNA from the viable  
132 PY79 *yhdL::kan* strain and selected on an LB plate supplemented with kanamycin and X-gal, we  
133 recovered numerous tiny blue colonies that did not grow when re-streaked onto fresh plates  
134 (consistent with the essentiality of YhdL in the 168 background), a few large white colonies (likely

135 *sigM* mutants), and intermediate sized blue colonies (Fig. 1B). The intermediate blue colonies  
136 grew to a similar size as a *yhdL* null mutant in PY79, consistent with acquisition of both the  
137 *yhdL::kan* allele and a second locus that suppresses the toxicity of high  $\sigma^M$ . Whole genome  
138 sequencing was performed on these transformants and the reads were mapped to the reference  
139 genome of 168. Out of 15 sequenced 168 transformants, 14 contained the same SNP imported  
140 from PY79 that generates a missense mutation in *spoIIIJ* (encoding SpoIIIJ<sup>Q140K</sup>) (Fig. S1A, Table  
141 S2). We therefore hypothesized that the *spoIIIJ*<sup>Q140K</sup> allele was the suppressor needed for cells to  
142 tolerate the *yhdL* mutation.

143 SpoIIIJ belongs to the YidC membrane protein insertase family and is responsible for  
144 inserting membrane proteins into the lipid bilayer, independently or in association with the Sec  
145 secretion system [16-18]. *E. coli* encodes one essential homolog of YidC, while some bacteria  
146 such as *B. subtilis* encode two homologs, SpoIIIJ(YidC) and YidC2 [18, 19]. The gene encoding  
147 YidC was named *spoIIIJ* because mutations at this locus lead to a block at stage III of sporulation  
148 [19, 20]. However, *spoIIIJ* is constitutively expressed and functional in vegetative cells. The  
149 expression of the paralog YidC2 is regulated by an upstream gene *mifM*, which monitors the total  
150 membrane protein insertase activity and only allows expression of YidC2 when MifM is not  
151 efficiently inserted into the membrane [21]. Both SpoIIIJ and YidC2 can fulfill the essential  
152 function of YidC insertase, with SpoIIIJ essential for sporulation [22] and YidC2 important for the  
153 development of competence (Fig. S2A) [23]. Interestingly, an alignment of YidC homologs  
154 revealed that the Gln140 residue is highly conserved among bacteria, and only *B. subtilis* PY79  
155 SpoIIIJ contains Lys at this position (Fig. 1C).

156 To test if this SpoIIIJ Gln to Lys variant (SpoIIIJ<sup>Q140K</sup>) is necessary and sufficient for  
157 tolerance of high  $\sigma^M$ , we introduced the *spoIIIJ*<sup>Q140K</sup> mutation at the native locus of strain 168 using

158 CRISPR, and found that *yhdL* was no longer essential (Fig. 1D, Fig. S1B). Conversely, changing  
159 the Lys140 into Gln in PY79 abolished the ability of PY79 to tolerate loss of *yhdL* (Fig. S1B),  
160 suggesting that the SpoIIIJ<sup>Q140K</sup> is necessary and sufficient for tolerance of a *yhdL* deletion  
161 mutation. To test if the *spoIIIJ*<sup>K140</sup> allele is dominant over the *spoIIIJ*<sup>Q140</sup> allele, we constructed  
162 merodiploid strains expressing both alleles of SpoIIIJ (using a vector with xylose-inducible  
163 promoter P<sub>xyIA</sub> that integrates into *ganA* and when induced produces about 70% amount of the  
164 native protein level (Fig. 2B)). Strains with either a P<sub>xyIA</sub>-*spoIIIJ*<sup>K140</sup> in the 168 strain, or P<sub>xyIA</sub>-  
165 *spoIIIJ*<sup>Q140</sup> in PY79 strain background could still tolerate the loss of *yhdL* (Fig. S1B). This  
166 dominance suggests that SpoIIIJ<sup>Q140K</sup> leads to a gain of function that enables cells to tolerate high  
167  $\sigma^M$  activity. Phase contrast microscopy revealed that a 168 SpoIIIJ<sup>Q140K</sup> *yhdL* mutant had a similar  
168 but slightly more elongated cell morphology compared with a PY79 *yhdL* mutant (Fig. 1E),  
169 confirming the major role of SpoIIIJ<sup>Q140K</sup> in tolerance of a *yhdL* null mutation.

170 As a general strategy to monitor cell fitness, we compared the impact of *spoIIIJ* alleles on  
171 morphology and colony size in the PY79 and 168 backgrounds mutant for *yhdK*. YhdK functions  
172 together with YhdL as an anti- $\sigma$  complex, but unlike *yhdL* a *yhdK* null mutant is tolerated in 168  
173 strains, although it does lead to an ~100-fold increase in  $\sigma^M$  regulon expression and severe growth  
174 defects [10]. Five independent trials with a 168 *yhdK* mutant, known to generate small colonies,  
175 revealed up to a ~10% change in average colony area. This variation likely results from small  
176 differences in the plating conditions. Although these small differences were in some cases judged  
177 to be statistically significant (based on P value in a t test, two tails, assuming unequal variances)  
178 (Fig. S1C), this reflects the high sample number in each measurement (100-1000 colonies per  
179 measurement). Considering this level of variation between genetically identical strains, we only  
180 regard as significant those changes of >10% in colony size. Using this assay, we found that the

181 small colony size, as well as the filamentous cell morphology of the 168 *yhdK* mutant, can be  
182 largely rescued by the *spoIIIJ*<sup>Q140K</sup> allele (Fig. 1F, G). Conversely, a *spoIIIJ*<sup>K140Q</sup> mutation in PY79  
183 *yhdK* converted the large colonies of the parent strain into the small round morphology of the 168  
184 *yhdK* strain, and the cells exhibited increased filamentation (Fig. 1F, G). Deletion of *spoIIIJ* in a  
185 PY79 *yhdK* mutant mimicked a *SpoIIIJ*<sup>K140Q</sup> mutation (Fig. 1G), likely because the cells now rely  
186 on the other YidC paralog, YidC2, which contains a glutamine residue in the equivalent position  
187 (Fig. 1C) [19]. Overall, our results show that *SpoIIIJ*<sup>Q140K</sup> mutation is necessary and sufficient for  
188 *B. subtilis* to tolerate high  $\sigma^M$  activity caused by the absence of the anti- $\sigma$  factor YhdL or its partner  
189 protein YhdK.

190

### 191 **Overexpression of SpoIIIJ increases tolerance of high $\sigma^M$ activity**

192 We hypothesized that the *SpoIIIJ*<sup>Q140K</sup> protein may simply be more active or abundant in  
193 cells than the native protein. To test if increasing insertase activity is sufficient to alleviate toxicity  
194 associated with high  $\sigma^M$ , we overexpressed the wild-type 168 *SpoIIIJ*<sup>Q140</sup> protein using a strong  
195 IPTG inducible promoter, P<sub>spac(hy)</sub> [24]. Induction of the P<sub>spac(hy)</sub>-*spoIIIJ*<sup>Q140</sup> allele led to a three-fold  
196 increase in the amount of *SpoIIIJ* protein compared with WT (Fig. 2B), and increased the colony  
197 size of a *yhdK* mutant by 68% (Fig. 2A). This increase is less than the effect of the *spoIIIJ*<sup>Q140K</sup>  
198 allele at the native locus (which increased *yhdK* colony size by 134%), and consistently it only  
199 marginally increased the growth of a *yhdL* depletion strain under depletion condition (Fig. S2C).  
200 The increase in the fitness of the *yhdK* mutant supports the hypothesis that higher insertase activity  
201 is beneficial for cells with elevated  $\sigma^M$  activity, but overexpression alone does not phenocopy the  
202 effect of the altered function allele.

203 We next tested whether overexpression of YidC2, the other YidC homolog in *Bacillus*,  
204 could benefit cells with high  $\sigma^M$  expression. Interestingly, when *yidC2* was overexpressed from  
205 the  $P_{\text{spac(hy)}}$  promoter, the growth defect of either the *yhdK* mutant or the *yhdL* depletion strain was  
206 exacerbated (Fig. 2A, S2C). Furthermore, when the equivalent glutamine residue of SpoIIIJ<sup>Q140</sup>  
207 was mutated to lysine, the YidC2<sup>Q148K</sup> mutant protein was toxic when overexpressed in a *yhdK*  
208 mutant (Fig. S2B). Thus, YidC2 is unable to compensate for SpoIIIJ in alleviating stress associated  
209 with high  $\sigma^M$  activity, even when the corresponding Gln to Lys substitution is present. Similarly,  
210 overexpression of *E. coli* YidC did not provide any benefit to a *yhdK* or *yhdL* mutant (Fig. 2A).  
211 However, when the equivalent Gln to Lys substitution was present, overexpression of the *E. coli*  
212 YidC<sup>Q429K</sup> mutant was modestly beneficial, and colony size of the *yhdK* mutant increased by 58%  
213 (Fig. 2A). These results suggest that different YidC homologs vary in their substrate preferences,  
214 and the Gln to Lys mutation may enhance the ability of the *B. subtilis* SpoIIIJ and *E. coli* YidC  
215 insertases to facilitate membrane insertion of at least some  $\sigma^M$ -dependent proteins.

216

### 217 **SpoIIIJ<sup>Q140K</sup> increases the positive charge inside the substrate binding groove**

218 The structure of YidC2 from *Bacillus halodurans* revealed a positively charged hydrophilic  
219 groove formed by five transmembrane segments [16]. A positively charged residue in the  
220 substrate-binding groove is essential for the function of the insertase, as a R73A substitution in *B.*  
221 *subtilis* SpoIIIJ completely abolished the essential function of SpoIIIJ *in vivo*, while an R73K  
222 substitution retained function [16]. Although the positive charge is essential, the R73 residue is  
223 not, as the positive charge can be provided by mutation of any of six other residues inside the  
224 hydrophilic groove to Arg. These six positions include Ile72 and Ile76 in transmembrane region 1  
225 (TM1), Gln140 and Leu144 in TM2, and Trp228 and Gly231 in TM5 [25] (Fig. 3A, S3B). Since

226 both Arg and Lys are positively charged, we hypothesized that the key feature of the PY79  
227 SpoIIIJ<sup>K140</sup> protein is the +2 charge inside its substrate binding chamber. To test this hypothesis,  
228 we engineered a SpoIIIJ<sup>R73AQ140K</sup> double substitution protein with a net charge of +1, where R73 is  
229 functionally replaced by K140. Expression of this protein is sufficient to support viability, as  
230 judged in a strain with depletion of *yidC2* (Fig. 3B), but is not sufficient to allow depletion of *yhdL*  
231 (Fig. 1D). This supports the idea that the key effect of the Q140K substitution is to increase the  
232 positive charge in the substrate binding groove.

233

### 234 **Increased charge inside the substrate binding groove is key for tolerance of high $\sigma^M$ activity**

235 Since it is the increased positive charge from +1 to +2, rather than the Q140K substitution  
236 *per se*, that rescues cells from high  $\sigma^M$  toxicity, we next set out to test if other combinations of  
237 positively charged residues can also rescue cells from high  $\sigma^M$  activity. To this end, we generated  
238 a library of SpoIIIJ variants with five of the six positions mentioned above substituted (or not)  
239 with Arg, as shown previously to support function in the absence of Arg73 [25], and Gln140  
240 substituted (or not) with Lys, as seen in PY79. In addition, we mutated Arg73 to Ala (or not) (Fig.  
241 3A). This leads to  $2^7=128$  possible charge combinations, ranging from 0 to a maximum of +7, with  
242 most containing a nominal positive charge of +2 to +5 in the substrate binding groove (Fig. S3A,  
243 S3B). Note that for the sake of simplicity, we assume that the K140 residue is positively charged,  
244 since the epsilon-amino group of free Lys has a pKa of  $\sim 10.5$ , but this will likely vary depending  
245 on the local charge environment.

246 To identify SpoIIIJ variants that can function to support growth of a *yhdL* depletion strain,  
247 we transformed a *spoIIIJ* null *yhdL* depletion strain and selected for transformants that grew in the  
248 absence of *yhdL* induction. After sequencing and validation, we identified 103 *spoIIIJ* mutants that

249 supported growth in the absence of *yhdL* induction (Table S3). Among them, 88 mutants contained  
250 a nominal double positive charge in 13 unique combinations (Fig. S3A). Five of these 13  
251 combinations include K140, including the combination present in the PY79 SpoIIIJ protein: R73  
252 K140. The remaining 15 mutants contained a nominal triple positive charge, with four unique  
253 combinations. Interestingly, all four of these variants contained K140, and in each case K140 was  
254 present together with a pair Arg residues that also supported growth with Q140. It is possible that  
255 the presence of nearby Arg residues lowers the pKa of K140, and the protonation state of this  
256 residue may also vary depending on the nature of the bound substrate. Among the 17 unique  
257 combinations of double and triple positive charges, none has more than one positive charge in  
258 TM1, whereas TM2 and TM5 can each harbor double positive charges (Fig. S3A, Table S3). We  
259 conclude that all 17 functional SpoIIIJ variants have an effective charge of between +2 and +3 in  
260 the substrate binding channel. This strongly suggests that a modest increase of charge inside the  
261 substrate binding chamber facilitates the insertion of  $\sigma^M$ -regulated proteins overproduced under  
262 YhdL depletion conditions, whereas a further increase may be detrimental to the activity or the  
263 stability of the insertase.

264 Each of these 17 SpoIIIJ variants can alleviate the stress imposed by high  $\sigma^M$  activity and  
265 support growth of the YhdL depletion strain (Fig. S3C), and increase the colony size of the *yhdK*  
266 mutant by up to 74% (Fig. 3C). We also found 16 of these 17 variants can support growth of a  
267 YidC2 depletion strain (Fig. S3D). Only the SpoIIIJ R72 K140 R144 variant was unable to support  
268 cell growth under these conditions, suggesting that it is compromised in the ability to insert  
269 proteins essential for cell growth, despite its ability to modestly increase colony size of the *yhdK*  
270 mutant (31%).



271 SpoIIIJ also inserts MifM into the membrane, which serves as a sensor of SpoIIIJ function  
272 to regulate expression of *yidC2* [21, 26]. We used a *yidC2'-lacZ* translational fusion reporter to  
273 measure the ability of each SpoIIIJ variant to insert MifM. A WT 168 strain exhibited very low  
274 level of *yidC2'-lacZ* activity in the presence of native *spoIIIJ* expression (~42 Miller Units (MU),  
275 Fig. 3D), and deletion of *spoIIIJ* increased the reporter activity by about 3-fold (~132 MU, Fig.  
276 3D). Complementation of a *spoIIIJ* null mutant with the 168 version of *spoIIIJ* (single positive  
277 charge at R73) at the *thrC* locus reduced the reporter activity to ~101 MU (Fig. 3D). The lack of  
278 complete complementation may be caused by the location of the gene, as the native locus is close  
279 to the origin of the chromosome and thus has higher copy number than *thrC* in fast growing cells.  
280 Indeed, under our growth condition (late exponential phase in LB at 37°C), less SpoIIIJ protein  
281 was detected in the *thrC::spoIIIJ* complementation strain than the WT (Fig. 3D).

282 Using this strain background, we found that most of the SpoIIIJ variants with double  
283 positive charge appear to have higher MifM insertion ability as they exhibited lower *yidC2'-lacZ*  
284 activity than the WT protein. Interestingly, the three mutants with double positive charge that have  
285 the largest colony size in a *yhdK* mutant background (R73 K140, K140 R144, and K140 R228),  
286 also showed the lowest *yidC2'-lacZ* activity, consistent with the hypothesis that they have higher  
287 insertase activity for both MifM and for proteins that contribute to toxicity in strains with high  $\sigma^M$ -  
288 activity. Conversely, one mutant with a nominal triple positive charge (R76 K140 R228) exhibited  
289 a strong increase in colony size in the *yhdK* mutant background (Fig. 3C), but appeared to have  
290 low MifM insertion activity (high *yidC2'-lacZ* expression; Fig. 3D). Overall these results suggest  
291 that increasing the positive charge inside the substrate binding groove affects the efficiency of  
292 inserting membrane proteins, with several variants that appear to enhance the insertion efficiency

293 for both MifM and  $\sigma^M$ -regulated proteins, while also retaining the ability to insert essential  
294 membrane proteins.

295

296 **High  $\sigma^M$  activity causes a cascade of stresses that can be partially compensated by its regulon**

297 SpoIIIJ functions as a membrane insertase, by either independently inserting some single  
298 pass membrane proteins or by functioning as part of the Sec translocon to facilitate the folding of  
299 the translocated proteins [18, 27]. The finding that SpoIIIJ<sup>Q140K</sup> can suppress growth defects caused  
300 by high  $\sigma^M$  leads us to reason that the toxicity of high  $\sigma^M$  is caused by overexpression of membrane  
301 proteins that overwhelm the secretion system, and that SpoIIIJ<sup>Q140K</sup> suppresses this stress by  
302 functioning as a more efficient insertase/foldase or chaperon. In *B. subtilis*, membrane secretion  
303 stress is sensed by the C<sub>ss</sub>R<sub>S</sub> (control of secretion stress regulator/sensor) two component system.  
304 In the presence of membrane secretion stress, caused either by overproduction of secreted proteins  
305 or high temperature, C<sub>ss</sub>R upregulates expression of membrane proteases HtrA (high temperature  
306 requirement A) and HtrB to facilitate the re-folding or degradation of misfolded proteins [28, 29].

307 To test whether high  $\sigma^M$  causes secretion stress, we constructed a P<sub>*htrA*</sub>-*lux* reporter to  
308 monitor induction of the C<sub>ss</sub>R-regulon. Indeed, P<sub>*htrA*</sub> activity was increased about ten-fold in a  
309 *yhdK* mutant, and this induction can be reduced by the SpoIIIJ<sup>Q140K</sup> allele by about 70% (Fig. 4A).  
310 To evaluate the role of the C<sub>ss</sub>R<sub>S</sub> system in alleviating the membrane protein overproduction stress  
311 under high  $\sigma^M$  condition, we constructed mutants missing components of the C<sub>ss</sub>R regulon and  
312 used *yhdK* mutant colony size as a measure of fitness. Surprisingly, we found that neither C<sub>ss</sub>R-  
313 regulated membrane protease (HtrA and HtrB) is important for fitness of the *yhdK* mutant as  
314 judged by the effect of their deletion on colony size. Deletion of the response regulator C<sub>ss</sub>R  
315 abolished the induction of the regulon [29], and has no effect on the fitness of *yhdK* mutant. In

316 contrast to a previous report [29], the absence of C<sub>ss</sub>S increased transcription of P<sub>*htrA*</sub>-*lux* reporter  
317 by ~80-fold. This suggests that C<sub>ss</sub>S may act both as a sensor kinase to activate C<sub>ss</sub>R and the  
318 regulon under induction conditions, and also as a phosphatase to deactivate C<sub>ss</sub>R in the absence  
319 of induction signals, as also noted for sensor kinases in other two component systems [30].

320 Deletion of *cssS* reduced *yhdK* mutant colony size by over 60% (Fig. 4B), and the reduction  
321 of colony size is reversed in a *cssS htrB* double mutant, suggesting that high HtrB activity is  
322 detrimental for the *yhdK* mutant. Consistently, when *htrB* but not *htrA* was overexpressed using  
323 the P<sub>spac(hy)</sub> promoter, the colony size of *yhdK* mutant was reduced by about 50% (Fig. 4B). Deletion  
324 of these genes in the WT 168 background did not have much effect on the colony size (Fig. S4A).  
325 These results suggest that the *yhdK* mutant is sensitive to the overproduction of membrane  
326 proteases. Single deletion of other proteases, including SipT, SipS, HtpX, PrsW and GlpG in a  
327 *yhdK* null mutant was also not detrimental, and in some cases led to a small beneficial effect in  
328 colony size (Fig S4B), again indicating that membrane protease activity is not beneficial for the  
329 *yhdK* mutant. We speculate that under high  $\sigma^M$  conditions, the overproduced proteins may cause a  
330 backlog of membrane proteins that require a longer time to correctly insert and fold in the  
331 membrane. Some of these proteins may be essential for cell growth and are vulnerable to  
332 degradation by membrane proteases.

333 Misfolding of membrane proteins, as well as jamming the Sec translocon by hybrid  
334 proteins, leads to the generation of reactive oxygen species (ROS) and ultimately DNA damage  
335 [31, 32]. To test whether high  $\sigma^M$  also triggers a similar cascade of stresses, we performed  
336 quantitative RT-PCR to measure induction of representative stress genes. Indeed, the high  $\sigma^M$   
337 activity in the *yhdK* null mutant was correlated with strong induction of genes involved in secretion  
338 stress (*secG*, *cssR*), oxidative stress (*katA*, *sodA*), and DNA repair (*lexA*, *dinB* and *recA*) (Fig 4C).

339 The induction of these stress response genes was largely suppressed in the presence of the  
340 *spoIIIJ*<sup>Q140K</sup> allele, suggesting that their induction is a downstream effect resulting from inefficient  
341 insertion of membrane proteins (Fig 4C).

342 Interestingly, while many genes in the  $\sigma^M$  regulon are involved in the synthesis and  
343 maintenance of the cell wall, there are also genes involved in regulation of redox balance (*spx* and  
344 the Spx regulon), DNA repair and recombination (for example, *radA*, *radC* and *recU*), and ppGpp  
345 synthesis and stringent response (*sasA*) [3]. There is also a candidate  $\sigma^M$  promoter associated with  
346 the *secDF* operon [3]. This suggests that a subset of genes in the  $\sigma^M$  regulon are involved in  
347 compensating for stresses associated with upregulation of  $\sigma^M$ . Indeed, deletion of *secDF*, *sasA* or  
348 the  $P_M$  of *spx* dramatically reduced the colony size of the *yhdK* mutant (Fig. 4D), while there was  
349 very little effect noted in the WT background (Fig. S4C). Thus, these genes seem to play an  
350 important role in cell fitness specifically under conditions of high  $\sigma^M$  expression. Deleting single  
351 genes inside the Spx regulon in the *yhdK* mutant did not lead to noticeable reduction of colony  
352 size (Fig. S4D), suggesting functional redundancy within the Spx regulon.

353 Among the 69 genes currently assigned to the  $\sigma^M$  regulon according to SubtiWiki [33], 38  
354 code for membrane-associated or secreted proteins (Table S4). To demonstrate the burden these  
355 membrane proteins may cause when overexpressed under high  $\sigma^M$  condition, we mutated the  $\sigma^M$ -  
356 dependent promoters ( $P_M$ ) for genes important for the elongasome and the divisome and tested the  
357 consequence on fitness measured by colony size of the *yhdK* mutant. We focused on a  $P_M$  inside  
358 *maf* gene that transcribes *radC-mreB-mreC-mreD-minC-minD* operon, a  $P_M$  upstream of *rodA*  
359 gene, and a  $P_M$  inside *murG* that contributes to transcription of the *murB-divIB-ylxW-ylxX-sbp-*  
360 *ftsA-ftsZ* operon (Fig 4E). Mutation of these three promoters individually or in combination had  
361 little effect on the colony size of the WT strain (Fig. S4E), since these genes are also expressed

362 from  $\sigma^A$ -dependent promoters. In a *yhdK* mutant, however, mutation of  $P_M(maf)$  and  $P_M(murG)$  led  
363 to an additive increase of colony size, while mutation of  $P_M(rodA)$  led to a small detrimental effect  
364 (Fig. 4F). We conclude that overexpression of genes downstream of  $P_M(maf)$  and  $P_M(murG)$  may  
365 overwhelm the membrane-protein insertion pathway, and thereby contribute to a net negative  
366 effect on cell fitness. Consistent with this idea, in cells expressing SpoIIIJ<sup>Q140K</sup>, the beneficial effect  
367 of mutating  $P_M(maf)$  and  $P_M(murG)$  was largely abolished (Fig. 4G).

368

## 369 Discussion

370 The YidC membrane protein insertase is the bacterial representative of the  
371 YidC/Oxa1/Alb3 protein family of evolutionary conserved integral membrane proteins [18, 27].  
372 In *E. coli*, YidC is required for the assembly of one or more essential protein complexes that reside  
373 in the inner membrane, including subunits of the energy generating  $F_1F_0$  ATPase and NADH  
374 dehydrogenase I [34]. Although YidC can function in concert with the SecYEG translocon as a  
375 foldase/chaperone, YidC can also function independently for the insertion of small membrane  
376 proteins with one or two transmembrane segments [35].

377 *Bacillus subtilis* encodes two YidC paralogs, SpoIIIJ and YidC2 (formerly YqjG). Either  
378 protein can support growth of *B. subtilis*, but a double mutant is inviable. Under most conditions  
379 SpoIIIJ is the functional YidC homolog and is responsible for insertion of transmembrane proteins,  
380 including the  $F_1F_0$  ATPase [19]. MifM, a membrane protein encoded upstream of *yidC2*, is also a  
381 substrate of SpoIIIJ and serves as a sensor for SpoIIIJ activity [21]. In the absence of SpoIIIJ  
382 activity, the translational pause caused by the membrane insertion of MifM is abolished and YidC2  
383 is translationally activated [26, 36]. Although either SpoIIIJ or YidC2 can support growth, they  
384 appear to differ in the efficacy of inserting specific proteins: cells lacking SpoIIIJ are impaired in

385 sporulation [20], whereas those lacking YidC2 have decreased competence [23]. The relationship  
386 between YidC protein sequence and the selection of specific client proteins is poorly understood.  
387 In cells depleted for both SpoIIIJ and YidC2 there was a substantial upregulation in expression of  
388 the Clp protease system and the LiaIH membrane-stress proteins that are regulated by the LiaRS  
389 two-component system [23]. This suggests that impairment of membrane protein insertion leads  
390 to an accumulation of misfolded proteins and disruption of the cell membrane.

391 One critical feature required for YidC function, as first visualized in the structure of the *B.*  
392 *halodurans* YidC protein [16], is a hydrophilic substrate-binding channel postulated to interact  
393 transiently with transmembrane segments of nascent integral membrane proteins. In YidC proteins  
394 the first transmembrane region (TM1) contains a conserved Arg residue that is essential for  
395 function in many, but not all, YidC orthologs [37]. This positively charged residue is postulated to  
396 form a salt-bridge with single-pass transmembrane client proteins with acidic residues in their  
397 amino-terminal region [16]. Remarkably, the function of this conserved Arg residues (R73 in  
398 *Bacillus* SpoIIIJ) can be replaced by Arg residues introduced at any of six other positions in  
399 transmembrane segments of YidC [25].

400 In this work, we have described an unusual variant of SpoIIIJ found in *B. subtilis* strain  
401 PY79 which contains the conserved R73 residue and additionally a second positively charged  
402 residue (K140) at a position that can functionally replace R73. This variant SpoIIIJ protein  
403 (SpoIIIJ<sup>Q140K</sup>) is necessary and sufficient for *B. subtilis* to survive high level expression of the  $\sigma^M$   
404 regulon. By screening of a library of SpoIIIJ variants with different charges, we revealed that all  
405 SpoIIIJ proteins that enable cells to tolerate loss of *yhdL* contain at least two, and in some cases  
406 three, positively charged residues in this channel. We postulated that these SpoIIIJ variants may  
407 be more capable of accommodating the increased expression of membrane proteins under  $\sigma^M$

408 control. Support for this hypothesis derives from experiments in which the deletion of individual  
409  $\sigma^M$ -dependent promoters that control operons encoding multiple integral membrane proteins was  
410 found to improve fitness of strains with high  $\sigma^M$  activity. Thus we reason that the relevant feature  
411 of SpoIIIJ<sup>Q140K</sup> is the presence of increased positive charge in the substrate-binding channel, which  
412 probably results in an increased insertase/foldase activity for specific  $\sigma^M$ -regulated membrane  
413 proteins.

414 Our results have clarified the nature of the lethality associated with a *yhdL* deletion that  
415 unleashes high level  $\sigma^M$  activity. In strains with elevated  $\sigma^M$  activity there is an increased flux of  
416 proteins targeted to the inner membrane and a subset of these may be inefficiently inserted by the  
417 native SpoIIIJ protein. This can result in a jamming of YidC-dependent protein translocation and  
418 a disruption of membrane function. The downstream sequelae associated with this disruption  
419 includes misfolding of proteins and induction of the secretion stress response (CssR), as well as  
420 genes associated with oxidative stress and DNA damage. These types of stresses may explain, in  
421 part, the inclusion of appropriate compensatory functions (including Spx, some DNA repair  
422 functions, and SecDF) as part of the  $\sigma^M$  regulon. It is presently unclear why the *spoIIIJ*<sup>Q140K</sup> allele  
423 arose in the PY79 strain, or what conditions may have led to its selection. However, this strain was  
424 derived from strains treated with chemical mutagens to cure the endogenous prophage SP $\beta$  [14]  
425 and this or other selection conditions may have contributed to emergence of this mutation. Further  
426 studies will be required to better understand how variations in YidC structure can fine-tune the  
427 substrate selectivity of this essential membrane protein insertase, and the stresses that arise when  
428 this system is challenged by the induction of highly expressed membrane proteins.

429

## 430 **Material and Methods**

## 431 **Strains, plasmids and growth condition**

432 All strains used in this work are listed in Table S5, and all DNA primers are listed in Table  
433 S6. Bacteria were routinely grown in liquid lysogeny broth (LB) with vigorous shaking, or on  
434 plates (1.5% agar; Difco) at 37 °C unless otherwise stated. LB medium contains 10 g tryptone, 5  
435 g yeast extract, and 5 g NaCl per liter. Plasmids were constructed using standard methods [38],  
436 and amplified in *E. coli* DH5 $\alpha$  or TG1 before transforming into *B. subtilis*. For selection of  
437 transformants, 100  $\mu\text{g ml}^{-1}$  ampicillin or 30  $\mu\text{g ml}^{-1}$  kanamycin was used for *E. coli*. Antibiotics  
438 used for selection of *B. subtilis* transformants include: kanamycin 15  $\mu\text{g ml}^{-1}$ , spectinomycin 100  
439  $\mu\text{g ml}^{-1}$ , macrolide-lincosamide-streptogramin B (MLS, contains 1  $\mu\text{g ml}^{-1}$  erythromycin and 25  
440  $\mu\text{g ml}^{-1}$  lincomycin), and chloramphenicol 10  $\mu\text{g ml}^{-1}$ . For spot dilution assays, cells were first  
441 grown in liquid culture at 37 °C with shaking to mid-exponential phase ( $\text{OD}_{600} \sim 0.3-0.4$ ), washed  
442 twice in LB medium without inducer, then serial diluted in LB medium without inducer. 10  $\mu\text{l}$  of  
443 each diluted culture was then spotted onto plates and allowed to dry before incubation at 37 °C for  
444 12-24 hours.

445

## 446 **Genetic techniques**

447 Chromosomal and plasmid DNA transformation was performed as previously stated [39].  
448 The pPL82 plasmid-based  $P_{\text{spac(hy)}}$  overexpression constructs were sequencing confirmed before  
449 linearized and integrated into the *amyE* locus [24]. The pAX01 plasmid-based  $P_{\text{xyIA}}$  overexpression  
450 constructs were sequencing confirmed before linearized and integrated into the *ganA* locus [40].  
451 The *ganA::P\_{xyIA}-yhdL-cat* and *thrC::P\_M-spoVG-lacZ-spec* constructs were made with LFH PCR to  
452 avoid antibiotic marker conflicts [10]. Markerless in-frame deletion mutants were constructed  
453 from BKE or BKK strains as described [41]. Briefly, BKE or BKK strains were acquired from the



454 *Bacillus* Genetics Stock Center (<http://www.bgsc.org>), chromosomal DNA was extracted, and the  
455 mutation containing an *erm*<sup>R</sup> (for BKE strains) or *kan*<sup>R</sup> (for BKK strains) cassette was transformed  
456 into our WT 168 strain. The antibiotic cassette was subsequently removed by introduction of the  
457 Cre recombinase carried on plasmid pDR244, which was later cured by growing at the non-  
458 permissive temperature of 42 °C. Gene deletions were confirmed by PCR screening using flanking  
459 primers. Unless otherwise described, all PCR products were generated using *B. subtilis* 168 strain  
460 chromosomal DNA as template. DNA fragments used for gene over-expression were verified by  
461 sequencing. Null mutant constructions were verified by PCR.

462 Mutations to selectively inactivate  $\sigma^M$ -dependent promoters were generated by either  
463 promoter deletion (*rodA*) or by inactivating point mutations (*murG*, *maf*, *spx*). To inactivate  
464  $P_M(\textit{rodA})$ , a 91 bp region containing the  $P_M$  (located upstream of a  $\sigma^A$ -dependent promoter) was  
465 deleted using CRISPR. The resulting deletion had a junction sequence of:  
466 CACATTATCGC/TTTCGTGTAGC. The point mutations inactivating *murG* and *maf* both  
467 changed the -10 region sequence from consensus, CGTC, to TGTT. The  $P_M^*$  mutation inactivating  
468 the promoter regulating the *yjbC-spx* operon is a 3 bp substitution changing the -10 region from  
469 consensus, CGTC, to AAGT, as previously described [42].

470 Mutations of *spoIIIJ* at native locus, as well as  $\Delta P_M\textit{-rodA}$  were constructed using a  
471 clustered regularly interspaced short palindromic repeats (CRISPR)-based mutagenesis method as  
472 previously described [10]. Briefly, possible protospacer adjacent motifs (PAM) site, which is NGG  
473 for *Streptococcus pyogenes* Cas9, was identified and off-target sites were checked against *B.*  
474 *subtilis* genome using BLAST. If no off-target site was identified, the PAM site was chosen and  
475 20 bps upstream of the site were used as sgRNA and cloned into vector pJOE8999 [43]. The repair  
476 template was generated by joining two or more PCR products, with intended mutation (with

477 additional mutation to abolish gRNA recognition if necessary) introduced by PCR primers, and  
478 cloned into the pJOE8999-sgRNA vector. DNA sequence for amino acid substitution was chosen  
479 according to the preferred codons of *B. subtilis* [44]. The pJOE8999 derivative containing both the  
480 sgRNA and repair template was then cloned into competent cells of *E. coli* strain TG1 to produce  
481 concatemer plasmids, which were transformed into *B. subtilis* at 30°C. Transformants were then  
482 grown at 42°C to cure the plasmid, and intended mutations were confirmed by sequencing.  $\Delta P_M$ -  
483 *rodA* was constructed with repair template amplified using primers 7426, 7427, 7428 and 7429,  
484 and the gRNA constructed using 7430 and 7431. SpoIIIJ<sup>Q140K</sup> mutation in 168 was constructed with  
485 repair template amplified using primers 7868, 7869, 7870 and 7871, and the gRNA constructed  
486 using 7866 and 7867. SpoIIIJ<sup>K140Q</sup> mutation in PY79 was constructed with repair template  
487 amplified using primers 7866, 8247, 8246 and 7871, and the gRNA constructed using 8248 and  
488 8249. SpoIIIJ<sup>R73A</sup> mutation was constructed with repair template amplified using strain 168  
489 genomic DNA as template with primers 7868, 8280, 8281 and 7871, and the gRNA constructed  
490 using 8278 and 8279. SpoIIIJ<sup>R73AQ140K</sup> mutation was constructed with the same primer sets for  
491 SpoIIIJ<sup>R73A</sup> mutation, except the repair template was amplified using strain PY79 genomic DNA.  
492 All constructs were sequencing confirmed.

493 SpoIIIJ library of different positive charges were constructed using degenerate primers and  
494 LFH PCR. Four DNA fragments were amplified and joined using LFH PCR. The fragments  
495 include one with part of gene *hom* and *thrC* (amplified with primers 8766 and 8767), one with the  
496 spoIIIJ gene from 168 (amplified with primers 8768 and 8681, containing the native promoter and  
497 ribosomal binding site), one with a spec<sup>R</sup> cassette (amplified with primers 8682 and 8769), and  
498 one with part of *thrC* and full length of *thrB* (amplified with primers 8770 and 8771). The joined  
499 PCR product was first transformed into strain 168 to generate HB23976. Then using genomic

500 DNA of HB23976 as template, four new DNA fragments were amplified using degenerate primer  
501 pairs 8766 and 8689, 8686 and 8690, 8687 and 8691, and 8688 and 8771. These fragments were  
502 joined together using LFH PCR and the joined PCR product (more than 10  $\mu$ g DNA) was expected  
503 to contain all 128 possible combinations of SpoIIIJ charge from 0 to +7. The PCR product library  
504 was used to transform strain 168, and more than ten-thousand transformants (from 20 plates, each  
505 contains more than 500 colonies) were pooled together to extract genomic DNA to form a virtually  
506 equivalent DNA library of the *spoIIIJ* variants. This genomic DNA library provides high  
507 transformation efficiency and was used to transform a *yhdL* depletion strain (HB23953) and  
508 transformants were selected on LB plate supplemented with X-gal but no xylose for *yhdL*  
509 induction. More than 200 transformants were re-streaked onto fresh LB plate with X-gal but no  
510 xylose to confirm robust growth under high SigM condition, and 103 of them were Sanger  
511 sequenced for the *thrC-spoIIIJ-spec* region to identify the *spoIIIJ* variants.

512

### 513 **Whole genome re-sequencing and sequence analysis**

514 Chromosomal DNA of suppressor strains was extracted using Qiagen DNeasy Blood &  
515 Tissue Kit. DNA was then sent to Cornell University Institute of Biotechnology for sequencing  
516 using Illumina HiSeq2500 with Single-end 100 bp reads. Sequencing results were analyzed using  
517 CLC workbench version 8.5.1 and mapped to the genome of strain 168 (reference accession  
518 number NC\_000964.3). Note that our working stock of *B. subtilis* 168 has 21 SNPs compared to  
519 the cited reference sequence, and these common SNPs were not considered, and only newly  
520 introduced SNPs from the PY79 strain were tabulated (Table S2). Unmapped reads were de novo  
521 assembled and contigs larger than 1 kb were BLASTed against genome of strain PY79 (reference  
522 accession number NC\_022898.1). Single nucleotide variants (SNVs) were detected using default

523 settings, and gene deletions larger than 300 bps were identified by manually scanning regions of  
524 low coverage.

525

### 526 **Colony size measurement**

527 Colony size was measured using Fiji Image J [45]. Briefly, bacterial cells were grown in liquid LB  
528 medium at 37°C with vigorous shaking to mid-exponential phase ( $OD_{600} \sim 0.3-0.4$ ), then serial  
529 diluted to desired concentrations. Diluted cells were plated onto fresh LB plates (15 ml medium  
530 per plate, the diameter of the plate is 10 cm and the height 15 mm, VWR, US, Catalog number  
531 25384-342), and multiple dilutions were used. Plates were incubated at 37 °C for 24 hours. Plates  
532 containing less than 100 separate single colonies were used for size measurement, because this  
533 number of colonies per plate ensures sufficient sample size and does not cause reduced colony size  
534 due to crowdedness and nutrient limitation. Pictures of plates were taken with a ruler as a length  
535 reference, and colony size was measured using Fiji Image J per software's instruction. For each  
536 strain, at least 100 colonies were measured, and box and whisker plots were used.

537

### 538 **Luciferase reporter construction and measurement**

539 Luciferase reporter construction and measurement was performed as previous described  
540 [46]. The luciferase reporters were constructed by inserting the tested promoters into the  
541 multicloning sites of pBS3*Clux* [47]. The promoter  $P_{htrA}$  was amplified using primers 8403 and  
542 8404. For luciferase measurements, 1  $\mu$ l of exponentially growing cells were inoculated into 99  $\mu$ l  
543 of fresh medium in a 96 well plate, incubated at 37 °C with shaking using a SpectraMax i3x plate  
544 reader, and  $OD_{600}$  and luminescence were measured every 12 min. The data was analyzed using

545 SoftMax Pro 7.0 software. Promoter activity was normalized by dividing the relative light units  
546 (RLU) by OD<sub>600</sub>.

547

#### 548 **Phase contrast microscopy**

549 Cells were grown in liquid LB medium to exponential phase (OD<sub>600</sub> ~0.4) and loaded on  
550 saline (0.90% NaCl, w/v) agarose pads (0.8% final concentration) on a glass slide. Phase contrast  
551 images were taken using a Leica DMI8 microscope equipped with a 100x immersion objective and  
552 Leica Application Suite X software.

553

#### 554 **Western blot**

555 Western blot was performed as described previously [42]. Briefly, cells were grown in 5  
556 ml LB medium in a 20 ml test tube at 37 °C with vigorous shaking. Inducer IPTG or xylose were  
557 added when required by the construct to induce SpoIIIJ. After reaching exponential phase  
558 (OD<sub>600</sub>~0.3-0.4), 1 ml cells were pelleted by centrifugation at 4°C, resuspended in 100 µl pre-  
559 chilled buffer (containing 25 µl 4X Laemmli Sample buffer (Bio-Rad, USA), 10 µl 1M DTT, 65  
560 µl H<sub>2</sub>O) and kept on ice. Cells were then lysed and crude cell lysate was loaded to a 4-20% SDS-  
561 PAGE stain-free gel for electrophoresis. The gel was visualized using ImageLab with stain-free  
562 gel protocol. Proteins were then transferred onto a PVDF membrane using the TransBlot Turbo  
563 Transfer System (Bio-Rad, USA), and immune blotting was performed using anti-SpoIIIJ  
564 antiserum. The blot was visualized using the Clarity Western ECL substrate (Bio-Rad) and  
565 ImageLab software. Band intensity was calculated using the ImageLab software and normalized  
566 using total protein amount according to SDS-PAGE gel image.

567

568  **$\beta$ -galactosidase assay for *yidC2'-lacZ***

569 Bacterial cells containing the *yidC2'-lacZ* translational fusion were grown to late exponential  
570 phase (OD<sub>600</sub> 0.6-0.8) in 96-well plates with 200  $\mu$ l LB medium per well at 37 °C with vigorous  
571 shaking. Cells were pelleted by centrifugation, resuspended in Z buffer supplemented with DTT  
572 (Dithiothreitol, 400 nM final concentration), and lysed by lysozyme. OD<sub>600</sub> was measured before  
573 lysozyme treatment. After lysis, ONPG (ortho-nitrophenyl- $\beta$ -galactoside) was added and OD<sub>420</sub>  
574 and OD<sub>550</sub> were measured every 2 minutes. Product accumulation was calculated using formula  
575  $\text{product}=1000\times[\text{OD}_{420}-(1.75\times\text{OD}_{550})]$  and plotted against time. The slope of the linear part of the  
576 product accumulation curve was calculated using Excel and Miller Unit (MU) was calculated using  
577 formula  $\text{MU}=\text{Slope}/\text{OD}_{600}/V$ , where V is the volume of cells used for the reaction (200  $\mu$ l).

578

579 **RNA extraction and qRT-PCR**

580 Cells were grown to mid-exponential phase (OD<sub>600</sub> ~0.4) and RNA was extracted using RNeasy  
581 Mini Kit (Qiagen). The extracted was then treated with DNase I (Invitrogen) and the quality of  
582 RNA was checked with electrophoresis. RNA was then reverse transcribed into cDNA using High-  
583 Capacity cDNA Reverse Transcription Kit (Applied Biosystems). Quantitative real-time PCR  
584 (qRT-PCR) was performed using SYBR Green (BioRad) and the *topA* gene was used for reference  
585 of data normalization.

586

587 **Acknowledgements:** We thank Dr. Shinobu Chiba for providing the *yidC2'-lacZ* translational  
588 fusion reporter and antiserum for SpoIIIJ, Dr. David Rudner and Alexander Meeske for strain  
589 BAM1077, Dr. Vaidehi Patel and Wen-Wen Zhou for providing the P<sub>M</sub>\* mutations for the *murG*  
590 and *maf* operons, and Dr. Tobias Doerr for valuable discussions and sharing equipment. We also

591 thank Dr. Pete Chandransu and Ahmed Gaballa for help with experimental design and  
592 interpretation, and Daniel Roistacher for helping with experiments.

593

#### 594 Author Contributions

595 Conceptualization: Heng Zhao, John D. Helmann

596 Funding acquisition: John D. Helmann.

597 Investigation: Heng Zhao, Anita Sachla

598 Project administration: John D. Helmann.

599 Writing - original draft: Heng Zhao, John D. Helmann.

600 Writing - review & editing: Heng Zhao, Anita Sachla, John D. Helmann.

601

602

603 **References**

604

- 605 1. Helmann JD. *Bacillus subtilis* extracytoplasmic function (ECF) sigma factors and defense  
606 of the cell envelope. *Curr Opin Microbiol.* 2016;30:122-32. Epub 2016/02/24. doi:  
607 10.1016/j.mib.2016.02.002. PubMed PMID: 26901131; PubMed Central PMCID:  
608 PMC4821709.
- 609 2. Sineva E, Savkina M, Ades SE. Themes and variations in gene regulation by  
610 extracytoplasmic function (ECF) sigma factors. *Curr Opin Microbiol.* 2017;36:128-37. doi:  
611 10.1016/j.mib.2017.05.004. PubMed PMID: 28575802; PubMed Central PMCID:  
612 PMC5534382.
- 613 3. Eiamphungporn W, Helmann JD. The *Bacillus subtilis* sigma(M) regulon and its  
614 contribution to cell envelope stress responses. *Mol Microbiol.* 2008;67(4):830-48. Epub  
615 2008/01/09. doi: 10.1111/j.1365-2958.2007.06090.x. PubMed PMID: 18179421; PubMed  
616 Central PMCID: PMC3025603.
- 617 4. Horsburgh MJ, Moir A. Sigma M, an ECF RNA polymerase sigma factor of *Bacillus*  
618 *subtilis* 168, is essential for growth and survival in high concentrations of salt. *Mol*  
619 *Microbiol.* 1999;32(1):41-50. Epub 1999/04/27. PubMed PMID: 10216858.
- 620 5. Luo Y, Helmann JD. Analysis of the role of *Bacillus subtilis* sigma(M) in beta-lactam  
621 resistance reveals an essential role for c-di-AMP in peptidoglycan homeostasis. *Mol*  
622 *Microbiol.* 2012;83(3):623-39. Epub 2012/01/04. doi: 10.1111/j.1365-2958.2011.07953.x.  
623 PubMed PMID: 22211522; PubMed Central PMCID: PMC3306796.
- 624 6. Meeske AJ, Riley EP, Robins WP, Uehara T, Mekalanos JJ, Kahne D, et al. SEDS proteins  
625 are a widespread family of bacterial cell wall polymerases. *Nature.* 2016;537(7622):634-8.  
626 Epub 2016/08/16. doi: 10.1038/nature19331. PubMed PMID: 27525505; PubMed Central  
627 PMCID: PMC5161649.
- 628 7. Asai K. Anti-sigma factor-mediated cell surface stress responses in *Bacillus subtilis*. *Genes*  
629 *Genet Syst.* 2018;92(5):223-34. Epub 2018/01/19. doi: 10.1266/ggs.17-00046. PubMed  
630 PMID: 29343670.
- 631 8. Woods EC, McBride SM. Regulation of antimicrobial resistance by extracytoplasmic  
632 function (ECF) sigma factors. *Microbes Infect.* 2017;19(4-5):238-48. doi:



- 633 10.1016/j.micinf.2017.01.007. PubMed PMID: 28153747; PubMed Central PMCID:  
634 PMCPMC5403605.
- 635 9. Yoshimura M, Asai K, Sadaie Y, Yoshikawa H. Interaction of *Bacillus subtilis*  
636 extracytoplasmic function (ECF) sigma factors with the N-terminal regions of their  
637 potential anti-sigma factors. *Microbiology*. 2004;150(Pt 3):591-9. doi:  
638 10.1099/mic.0.26712-0. PubMed PMID: 14993308.
- 639 10. Zhao H, Roistacher DM, Helmann JD. Deciphering the essentiality and function of the  
640 anti-sigma(M) factors in *Bacillus subtilis*. *Mol Microbiol*. 2019. doi: 10.1111/mmi.14216.  
641 PubMed PMID: 30715747.
- 642 11. Murakami T, Haga K, Takeuchi M, Sato T. Analysis of the *Bacillus subtilis spoIIIJ* gene  
643 and its Parologue gene, *yqjG*. *J Bacteriol*. 2002;184(7):1998-2004. doi:  
644 10.1128/jb.184.7.1998-2004.2002. PubMed PMID: 11889108; PubMed Central PMCID:  
645 PMCPMC134917.
- 646 12. Tjalsma H, Bron S, van Dijl JM. Complementary impact of paralogous Oxa1-like proteins  
647 of *Bacillus subtilis* on post-translocational stages in protein secretion. *J Biol Chem*.  
648 2003;278(18):15622-32. doi: 10.1074/jbc.M301205200. PubMed PMID: 12586834.
- 649 13. Zeigler DR, Pragai Z, Rodriguez S, Chevreux B, Muffler A, Albert T, et al. The origins of  
650 168, W23, and other *Bacillus subtilis* legacy strains. *J Bacteriol*. 2008;190(21):6983-95.  
651 Epub 2008/08/30. doi: 10.1128/JB.00722-08. PubMed PMID: 18723616; PubMed Central  
652 PMCID: PMCPMC2580678.
- 653 14. Schroeder JW, Simmons LA. Complete Genome Sequence of *Bacillus subtilis* Strain  
654 PY79. *Genome Announc*. 2013;1(6). Epub 2013/12/21. doi: 10.1128/genomeA.01085-13.  
655 PubMed PMID: 24356846; PubMed Central PMCID: PMCPMC3868870.
- 656 15. Dubnau D, Cirigliano C. Fate of transforming DNA following uptake by competent  
657 *Bacillus subtilis*. Formation and properties of products isolated from transformed cells  
658 which are derived entirely from donor DNA. *J Mol Biol*. 1972;64(1):9-29. Epub  
659 1972/02/28. PubMed PMID: 4622632.
- 660 16. Kumazaki K, Chiba S, Takemoto M, Furukawa A, Nishiyama K, Sugano Y, et al.  
661 Structural basis of Sec-independent membrane protein insertion by YidC. *Nature*.  
662 2014;509(7501):516-20. Epub 2014/04/18. doi: 10.1038/nature13167. PubMed PMID:  
663 24739968.

- 664 17. Tsirigotaki A, De Geyter J, Sostaric N, Economou A, Karamanou S. Protein export through  
665 the bacterial Sec pathway. *Nat Rev Microbiol.* 2017;15(1):21-36. Epub 2016/11/29. doi:  
666 10.1038/nrmicro.2016.161. PubMed PMID: 27890920.
- 667 18. Hennon SW, Soman R, Zhu L, Dalbey RE. YidC/Alb3/Oxa1 Family of Insertases. *J Biol*  
668 *Chem.* 2015;290(24):14866-74. Epub 2015/05/08. doi: 10.1074/jbc.R115.638171. PubMed  
669 PMID: 25947384; PubMed Central PMCID: PMC4463434.
- 670 19. Saller MJ, Fusetti F, Driessen AJ. *Bacillus subtilis* SpoIIIJ and YqjG function in membrane  
671 protein biogenesis. *J Bacteriol.* 2009;191(21):6749-57. Epub 2009/09/01. doi:  
672 10.1128/JB.00853-09. PubMed PMID: 19717609; PubMed Central PMCID:  
673 PMC42795313.
- 674 20. Errington J, Appleby L, Daniel RA, Goodfellow H, Partridge SR, Yudkin MD. Structure  
675 and function of the *spoIIIJ* gene of *Bacillus subtilis*: a vegetatively expressed gene that is  
676 essential for sigma G activity at an intermediate stage of sporulation. *J Gen Microbiol.*  
677 1992;138(12):2609-18. Epub 1992/12/01. doi: 10.1099/00221287-138-12-2609. PubMed  
678 PMID: 1487728.
- 679 21. Chiba S, Ito K. MifM monitors total YidC activities of *Bacillus subtilis*, including that of  
680 YidC2, the target of regulation. *J Bacteriol.* 2015;197(1):99-107. Epub 2014/10/15. doi:  
681 10.1128/JB.02074-14. PubMed PMID: 25313395; PubMed Central PMCID:  
682 PMC4288694.
- 683 22. Corte L, Valente F, Serrano M, Gomes CM, Moran CP, Jr., Henriques AO. A conserved  
684 cysteine residue of *Bacillus subtilis* SpoIIIJ is important for endospore development. *PLoS*  
685 *One.* 2014;9(8):e99811. Epub 2014/08/19. doi: 10.1371/journal.pone.0099811. PubMed  
686 PMID: 25133632; PubMed Central PMCID: PMC4136701.
- 687 23. Saller MJ, Otto A, Berrelkamp-Lahpor GA, Becher D, Hecker M, Driessen AJ. *Bacillus*  
688 *subtilis* YqjG is required for genetic competence development. *Proteomics.*  
689 2011;11(2):270-82. Epub 2011/01/05. doi: 10.1002/pmic.201000435. PubMed PMID:  
690 21204254.
- 691 24. Quisel JD, Burkholder WF, Grossman AD. In vivo effects of sporulation kinases on mutant  
692 Spo0A proteins in *Bacillus subtilis*. *J Bacteriol.* 2001;183(22):6573-8. doi:  
693 10.1128/JB.183.22.6573-6578.2001. PubMed PMID: 11673427; PubMed Central PMCID:  
694 PMC495488.

- 695 25. Shimokawa-Chiba N, Kumazaki K, Tsukazaki T, Nureki O, Ito K, Chiba S. Hydrophilic  
696 microenvironment required for the channel-independent insertase function of YidC protein.  
697 Proc Natl Acad Sci U S A. 2015;112(16):5063-8. Epub 2015/04/10. doi:  
698 10.1073/pnas.1423817112. PubMed PMID: 25855636; PubMed Central PMCID:  
699 PMCPMC4413333.
- 700 26. Chiba S, Ito K. Multisite ribosomal stalling: a unique mode of regulatory nascent chain  
701 action revealed for MifM. Mol Cell. 2012;47(6):863-72. Epub 2012/08/07. doi:  
702 10.1016/j.molcel.2012.06.034. PubMed PMID: 22864117.
- 703 27. Kuhn A, Kiefer D. Membrane protein insertase YidC in bacteria and archaea. Mol  
704 Microbiol. 2017;103(4):590-4. Epub 2016/11/24. doi: 10.1111/mmi.13586. PubMed  
705 PMID: 27879020.
- 706 28. Hyyrylainen HL, Bolhuis A, Darmon E, Muukkonen L, Koski P, Vitikainen M, et al. A  
707 novel two-component regulatory system in *Bacillus subtilis* for the survival of severe  
708 secretion stress. Mol Microbiol. 2001;41(5):1159-72. PubMed PMID: 11555295.
- 709 29. Darmon E, Noone D, Masson A, Bron S, Kuipers OP, Devine KM, et al. A novel class of  
710 heat and secretion stress-responsive genes is controlled by the autoregulated CssRS two-  
711 component system of *Bacillus subtilis*. J Bacteriol. 2002;184(20):5661-71. doi:  
712 10.1128/jb.184.20.5661-5671.2002. PubMed PMID: 12270824; PubMed Central PMCID:  
713 PMCPMC139597.
- 714 30. Podgornaia AI, Laub MT. Determinants of specificity in two-component signal  
715 transduction. Curr Opin Microbiol. 2013;16(2):156-62. Epub 2013/01/29. doi:  
716 10.1016/j.mib.2013.01.004. PubMed PMID: 23352354.
- 717 31. Takahashi N, Gruber CC, Yang JH, Liu X, Braff D, Yashaswini CN, et al. Lethality of  
718 MalE-LacZ hybrid protein shares mechanistic attributes with oxidative component of  
719 antibiotic lethality. Proc Natl Acad Sci U S A. 2017. Epub 2017/08/11. doi:  
720 10.1073/pnas.1707466114. PubMed PMID: 28794281; PubMed Central PMCID:  
721 PMCPMC5576823.
- 722 32. Kohanski MA, Dwyer DJ, Wierzbowski J, Cottarel G, Collins JJ. Mistranslation of  
723 membrane proteins and two-component system activation trigger antibiotic-mediated cell  
724 death. Cell. 2008;135(4):679-90. Epub 2008/11/18. doi: 10.1016/j.cell.2008.09.038.  
725 PubMed PMID: 19013277; PubMed Central PMCID: PMCPMC2684502.

- 726 33. Zhu B, Stulke J. SubtiWiki in 2018: from genes and proteins to functional network  
727 annotation of the model organism *Bacillus subtilis*. *Nucleic Acids Res.* 2018;46(D1):D743-  
728 D8. Epub 2018/05/23. doi: 10.1093/nar/gkx908. PubMed PMID: 29788229; PubMed  
729 Central PMCID: PMC5753275.
- 730 34. Price CE, Driessen AJ. YidC is involved in the biogenesis of anaerobic respiratory  
731 complexes in the inner membrane of *Escherichia coli*. *J Biol Chem.* 2008;283(40):26921-7.  
732 doi: 10.1074/jbc.M804490200. PubMed PMID: 18635537.
- 733 35. Dalbey RE, Kuhn A, Zhu L, Kiefer D. The membrane insertase YidC. *Biochim Biophys*  
734 *Acta.* 2014;1843(8):1489-96. doi: 10.1016/j.bbamcr.2013.12.022. PubMed PMID:  
735 24418623.
- 736 36. Chiba S, Lamsa A, Pogliano K. A ribosome-nascent chain sensor of membrane protein  
737 biogenesis in *Bacillus subtilis*. *EMBO J.* 2009;28(22):3461-75. Epub 2009/09/26. doi:  
738 10.1038/emboj.2009.280. PubMed PMID: 19779460; PubMed Central PMCID:  
739 PMC2782093.
- 740 37. Chen Y, Soman R, Shanmugam SK, Kuhn A, Dalbey RE. The role of the strictly conserved  
741 positively charged residue differs among the Gram-positive, Gram-negative, and  
742 chloroplast YidC homologs. *J Biol Chem.* 2014;289(51):35656-67. Epub 2014/11/02. doi:  
743 10.1074/jbc.M114.595082. PubMed PMID: 25359772; PubMed Central PMCID:  
744 PMC4271247.
- 745 38. Luo Y, Asai K, Sadaie Y, Helmann JD. Transcriptomic and phenotypic characterization of  
746 a *Bacillus subtilis* strain without extracytoplasmic function sigma factors. *J Bacteriol.*  
747 2010;192(21):5736-45. Epub 2010/09/08. doi: 10.1128/JB.00826-10. PubMed PMID:  
748 20817771; PubMed Central PMCID: PMC2953670.
- 749 39. Zhao H, Sun Y, Peters JM, Gross CA, Garner EC, Helmann JD. Depletion of Undecaprenyl  
750 Pyrophosphate Phosphatases Disrupts Cell Envelope Biogenesis in *Bacillus subtilis*. *J*  
751 *Bacteriol.* 2016;198(21):2925-35. doi: 10.1128/JB.00507-16. PubMed PMID: 27528508;  
752 PubMed Central PMCID: PMC5055597.
- 753 40. Hartl B, Wehrl W, Wiegert T, Homuth G, Schumann W. Development of a new integration  
754 site within the *Bacillus subtilis* chromosome and construction of compatible expression  
755 cassettes. *J Bacteriol.* 2001;183(8):2696-9. Epub 2001/03/29. doi: 10.1128/JB.183.8.2696-  
756 2699.2001. PubMed PMID: 11274134; PubMed Central PMCID: PMC95191.

- 757 41. Koo BM, Kritikos G, Farelli JD, Todor H, Tong K, Kimsey H, et al. Construction and  
758 Analysis of Two Genome-Scale Deletion Libraries for *Bacillus subtilis*. *Cell Syst*.  
759 2017;4(3):291-305 e7. Epub 2017/02/13. doi: 10.1016/j.cels.2016.12.013. PubMed PMID:  
760 28189581; PubMed Central PMCID: PMC5400513.
- 761 42. Rojas-Tapias DF, Helmann JD. Induction of the Spx regulon by cell wall stress reveals  
762 novel regulatory mechanisms in *Bacillus subtilis*. *Mol Microbiol*. 2018;107(5):659-74.  
763 Epub 2017/12/23. doi: 10.1111/mmi.13906. PubMed PMID: 29271514; PubMed Central  
764 PMCID: PMC5820111.
- 765 43. Altenbuchner J. Editing of the *Bacillus subtilis* Genome by the CRISPR-Cas9 System.  
766 *Appl Environ Microbiol*. 2016;82(17):5421-7. Epub 2016/06/28. doi:  
767 10.1128/AEM.01453-16. PubMed PMID: 27342565; PubMed Central PMCID:  
768 PMC4988203.
- 769 44. Moszer I, Rocha EP, Danchin A. Codon usage and lateral gene transfer in *Bacillus subtilis*.  
770 *Curr Opin Microbiol*. 1999;2(5):524-8. Epub 1999/10/06. PubMed PMID: 10508724.
- 771 45. Schindelin J, Arganda-Carreras I, Frise E, Kaynig V, Longair M, Pietzsch T, et al. Fiji: an  
772 open-source platform for biological-image analysis. *Nat Methods*. 2012;9(7):676-82. Epub  
773 2012/06/30. doi: 10.1038/nmeth.2019. PubMed PMID: 22743772; PubMed Central  
774 PMCID: PMC3855844.
- 775 46. Zhao H, Roistacher DM, Helmann JD. Aspartate deficiency limits peptidoglycan synthesis  
776 and sensitizes cells to antibiotics targeting cell wall synthesis in *Bacillus subtilis*. *Mol*  
777 *Microbiol*. 2018;109(6):826-44. Epub 2018/07/12. doi: 10.1111/mmi.14078. PubMed  
778 PMID: 29995990; PubMed Central PMCID: PMC6185803.
- 779 47. Radeck J, Kraft K, Bartels J, Cikovic T, Durr F, Emenegger J, et al. The *Bacillus* BioBrick  
780 Box: generation and evaluation of essential genetic building blocks for standardized work  
781 with *Bacillus subtilis*. *J Biol Eng*. 2013;7(1):29. Epub 2013/12/04. doi: 10.1186/1754-  
782 1611-7-29. PubMed PMID: 24295448; PubMed Central PMCID: PMC4177231.
- 783 48. Pettersen EF, Goddard TD, Huang CC, Couch GS, Greenblatt DM, Meng EC, et al. UCSF  
784 Chimera--a visualization system for exploratory research and analysis. *J Comput Chem*.  
785 2004;25(13):1605-12. Epub 2004/07/21. doi: 10.1002/jcc.20084. PubMed PMID:  
786 15264254.

787

788

789

## 790 **Figure Legends**

791

792 **Fig. 1. Identification of a SpoIIIJ variant that is necessary and sufficient to abolish the**  
793 **essentiality of the anti- $\sigma^M$  factor YhdL.** (A) Growth of PY79  $P_M$ -*lacZ yhdL* strain on LB plate  
794 with 60  $\mu$ g/ml X-Gal. (B) Transformation plate using 168  $P_M$ -*lacZ* as recipient and PY79  $P_M$ -  
795 *lacZ yhdL::kan* as DNA donor, with LB medium supplemented with kanamycin and X-Gal. Red  
796 arrows are pointed at intermediate sized blue colonies that were further analyzed by whole  
797 genome re-sequencing. (C) Alignment of YidC homologs from bacterial and eukaryotic species.  
798 Region of the Q140 of *B. subtilis* SpoIIIJ is shown. (D) Spot dilution of *yhdL*  $P_{xyIA}$ -*yhdL*  
799 depletion strain with different SpoIIIJ alleles. WT168 has SpoIIIJ<sup>Q140</sup> allele. (E) Representative  
800 phase contrast microscopy image of *yhdL* mutants in different strain backgrounds. PY79 WT has  
801 SpoIIIJ<sup>K140</sup> allele. (F) Representative phase contrast microscopy photo of *yhdK* mutants in  
802 different strain backgrounds. (G) Colony morphology and size of *yhdK* mutants in different  
803 backgrounds. Colony size data were plotted using Box and Whisker chart and the bottom and top  
804 of the box are the first and third quartiles, the band inside the box is the second quartile (the  
805 median), and the X inside the box is the mean. Whiskers are one standard deviation above or  
806 below the mean. Outliers are shown as single dots. Average colony size change was calculated  
807 using formulation “change = (sample - control) / control x 100%”. P value was calculated using  
808 student’s t test, two tails, assuming unequal variances. Sample number n is at least 100 for each  
809 sample.

810

811 **Fig. 2. Overexpression of SpoIIIJ increases tolerance of high  $\sigma^M$  activity.** (A) Colony size of  
812 *yhdK* mutants in 168 background with overexpression of YidC homologs using an IPTG  
813 inducible  $P_{spac(hy)}$  promoter. Cells were grown on LB plate supplemented with 1 mM IPTG for 24  
814 hours at 37 °C. Box and Whisker chart was plotted as in Fig. 1G. (B) Representative Western  
815 blot of SpoIIIJ protein in different strain backgrounds.  $P_{spac(hy)}$  and  $P_{xyIA}$  induced SpoIIIJ strains  
816 contain the native SpoIIIJ and were induced with 1 mM IPTG or 1% (w/v) xylose, respectively.  
817 Part of the SDS PAGE gel was shown as a loading control. Relative SpoIIIJ quantity was



818 calculated using band intensity values from three biological replicates and normalized using total  
819 lane intensity from the SDS PAGE gel. Data is presented as mean  $\pm$  SEM.

820

821 **Fig. 3. Effects of different charge variants inside the SpoIIIJ substrate binding groove.** (A)  
822 Schematic drawing showing the extracellular, transmembrane and cytoplasmic domains of  
823 SpoIIIJ. The native sequence in strain 168 of the seven residues for the positive charge library  
824 were shown. (B) Spot dilution of *yidC2* P<sub>xyIA</sub>-*yidC2* depletion strain with different SpoIIIJ  
825 variants in strain 168. (C) Colony size of *yhdK spoIIIJ* mutants with different *spoIIIJ* alleles  
826 integrated in *thrC* site. Residues that provide positive charge(s), as well as total positive  
827 charge(s) provided by these seven variable positions are labelled. The red line shows the median  
828 of colony size with a WT SpoIIIJ from strain 168. Box and Whisker chart was plotted as in Fig.  
829 1G. (D) Top, representative Western blots of SpoIIIJ protein in different strain backgrounds. Part  
830 of the SDS PAGE gels were shown as loading control. Bottom, activity of *yidC2'*-*lacZ*  
831 translational fusion in the same strain backgrounds of the Western blots. “WT” has a native copy  
832 of *spoIIIJ* while “*spoIIIJ*” is a markerless deletion mutant. All other strains have the native  
833 *spoIIIJ* deleted and contain variants of *spoIIIJ* at *thrC* site. Among the seven variable positions,  
834 residues that provide positive charge(s) are labelled. SpoIIIJ variants inside the red boxes cannot  
835 support growth of a *yidC2* P<sub>xyIA</sub>-*yidC2* depletion strain in the absence of inducer xylose. Green  
836 shading highlights the difference between the activity of SpoIIIJ at the native and *thrC* loci.  
837 Variants with *yidC2'*-*lacZ* activity inside the green shading exhibit increased MifM insertion  
838 activity compared with WT.

839

840 **Fig. 4. High  $\sigma^M$  activity causes a cascade of stresses that can be partially compensated by its**  
841 **own regulon.** (A) Maximum promoter activity of *htrA* measured using a P<sub>htrA</sub>-*lux* transcriptional  
842 fusion reporter in different strain backgrounds. Data is presented as mean  $\pm$  SEM, and  
843 statistically significant different samples (Student’s t test, two-tailed P<0.05) are labelled with  
844 different letters. Sample number n is at least 4. (B) Colony size of *yhdK* mutants in strain 168  
845 with different additional mutations. Box and Whisker chart was plotted as in Fig. 1G. (C) Fold  
846 change of transcription levels of representative genes for stress response or housekeeping genes.  
847 Data is presented as mean  $\pm$  SEM. Sample number n is at least 4. (D) Colony size of *yhdK*  
848 mutants in strain 168 with different additional mutations.  $\Delta$ P<sub>M</sub>-*spx* strain has the native *spx*

849 deleted and an ectopic copy without the  $P_M$  promoter [42]. (E) Schematic drawing of *maf*, *murG*  
850 operon and *rodA* gene.  $\sigma^A$  and  $\sigma^M$  controlled promoters are shown with arrows. Cytoplasmic  
851 proteins are labelled in blue boxes, peripheral membrane proteins in pink boxes, and membrane  
852 integral proteins in red boxes. (F, G) Colony size of *yhdK* mutants with different  $P_M$  promoter(s)  
853 mutated in (F) WT strain 168 or (G) strain 168 with the native *spoIIIJ* deleted and a *SpoIIIJ*<sup>Q140K</sup>  
854 allele integrated at the *thrC* site. Box and Whisker chart was plotted as in Fig. 1G.

855

## 856 Supplemental Figure legends

857

858 **Fig. S1. A.** Map of SNPs from strain PY79 to 168 and distribution of SNPs contained in each  
859 congression suppressors. Genome coordinates were based on the 168 reference genome with  
860 NCBI accession number NC\_000964.3. **B.** Transformation plates of *yhdL::kan* allele transformed  
861 into different strain backgrounds, selected on LB plates supplemented with kanamycin, X-gal  
862 and 1% xylose. **C.** Variation of *yhdK* colony size measurement between trials on different days  
863 with different batches of LB plates. P value was calculated using Student's t test, and percentage  
864 changes of average colony size were shown.

865

866 **Fig. S2. A.** Venn diagram of function overlap and distinction of *SpoIIIJ* and *YidC2* of *Bacillus*  
867 *subtilis*. **B.** Streaking of *yhdK*  $P_{\text{spac(hy)}}\text{-yidC2}^{\text{Q148K}}$  on plates of LB or LB supplemented with 1 mM  
868 IPTG (final concentration). **C.** Spot dilution of *yhdL* depletion strains with  $P_{\text{spac(hy)}}$  based  
869 overexpression of different *YidC* homologs, on LB plates supplemented with a final  
870 concentration of 1% xylose (+Xylose), 1 mM IPTG (+IPTG) or nothing (None).

871

872 **Fig. S3. A.** Distribution of 128 possible charges of *SpoIIIJ* in the *spoIIIJ* variants library.  
873 Theoretically, the majority of *SpoIIIJ* in the input DNA library contains +2 to +5 charges, while  
874 experimental data from 103 samples suggests the ones capable of providing high SigM tolerance  
875 contain +2 or +3 charges. Among the 103 samples with +2 or +3 charges, the positive charge can  
876 be located in one, two or three transmembrane segments, with the exception that no sample  
877 contains more than one positive charge in TM1 alone. **B.** Crystal structure of *YidC* from *Bacillus*  
878 *halodurans* (PDB ID 3WO6), showing the seven variable amino acid providing positive charges  
879 in the hydrophilic substrate binding chamber of the enzyme. Gly231 is not visible due to the lack



880 of side chain of this residue. TM1-5, transmembrane region 1-5; E1, extracytoplasmic region 1;  
881 C1, cytoplasmic region 1. This figure was generated using UCSF Chimera 1.13[48]. **C.** Streaking  
882 of *yhdL* depletion strains with SpoIIIJ variants on LB plates with or without xylose inducer for  
883 *yhdL*. The positive charge of each variant was labelled next to the streaking, with a negative  
884 control “None” meaning no *spoIIIJ* variants at *thrC* locus (weak growth due to the depletion  
885 conditions, and cannot be restreaked), and a positive control “SpoIIIJ<sub>PY79</sub>” meaning the native  
886 SpoIIIJ mutated into the PY79 Q140K version (HB23719). **D.** Spot dilution of YidC depletion  
887 strains with *spoIIIJ* variants at *thrC* locus. The depletion strain has its native *spoIIIJ* and *yidC2*  
888 deleted, and a xylose inducible copy of P<sub>xyIA</sub>-*yidC2*. Diluted cultures were spotted on LB without  
889 xylose (-Xyl) or with 1% final concentration of xylose (+Xyl). The negative control (None) has  
890 no *spoIIIJ* at *thrC* locus, while the positive control has the 168 version of *spoIIIJ* that contains a  
891 single positive charge at R73. Some SpoIIIJ variants exhibited reduced growth ability, and the  
892 variant containing R72 K140 R144 failed to growth, although the emergence of suppressors was  
893 noted.

894

895 **Fig. S4.** Colony size of different strains. Percentage changes of average colony size were shown  
896 on each Box and Whisker plot.

897

898 **Table S1.** Genes compared between reference genomes of *B. subtilis* 168 (NCBI accession  
899 number NC\_000964.3) and PY79 (NC\_022898.1). No mutations were found in these genes.

900

901 **Table S2.** Whole genome sequencing of transformants generated by congression.

902

903 **Table S3.** Amino acid substitutions in SpoIIIJ variants selected in *yhdL* depletion strain.

904

905 **Table S4.** Secreted and membrane-associated proteins in the  $\sigma^M$  regulon.

906

907 **Table S5.** *Bacillus subtilis* strains used in this study.

908

909 **Table S6.** Primers used in this study.

910

# Figure 1. Identification of a SpoIIJ mutant that is necessary and sufficient to abolish the essentiality of the anti-SigM factor YhdL

**A**

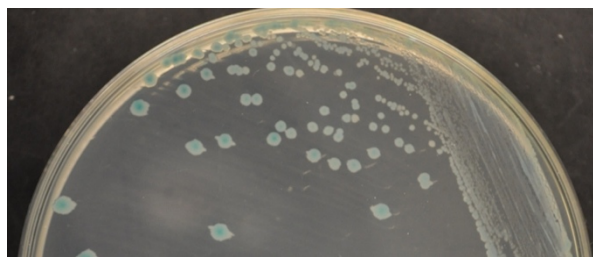

PY79  $P_M$ -lacZ *yhdL*

**B**

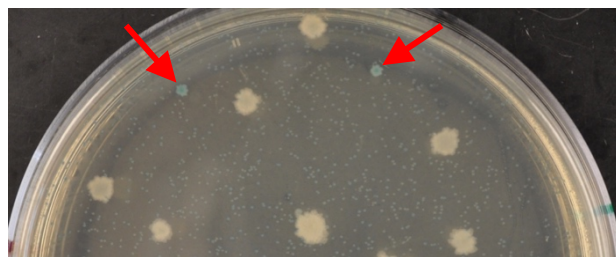

Transformation of 168 using PY79 *yhdL* genomic DNA

**C**

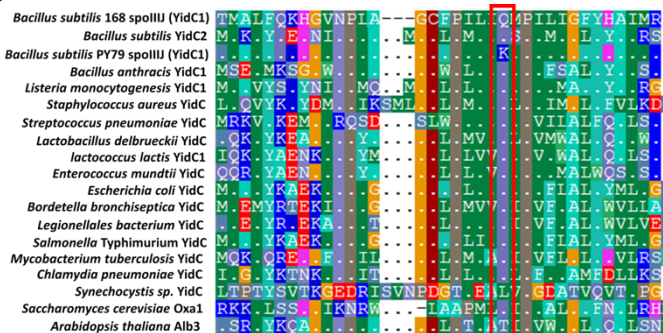

**D**

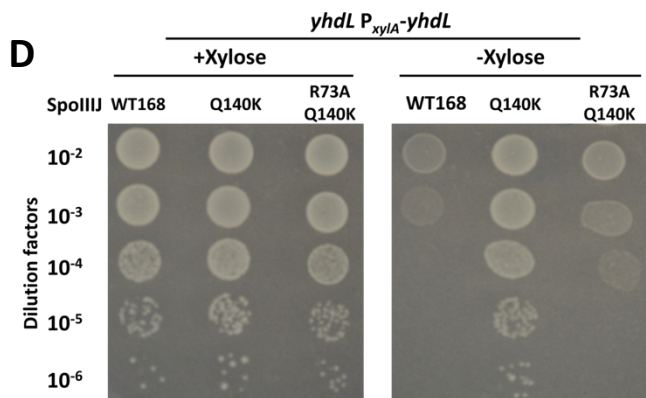

**E**

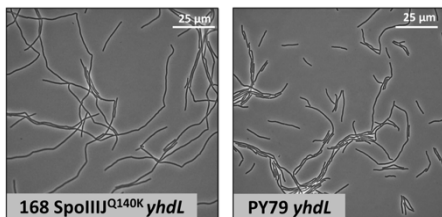

**F**

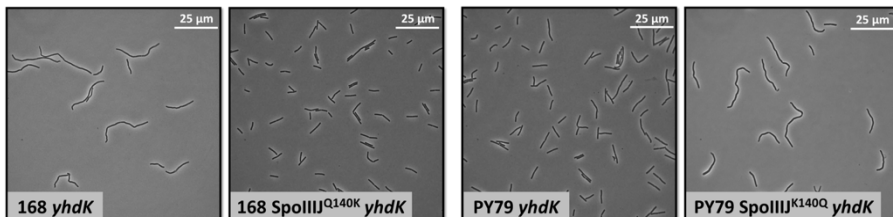

**G**

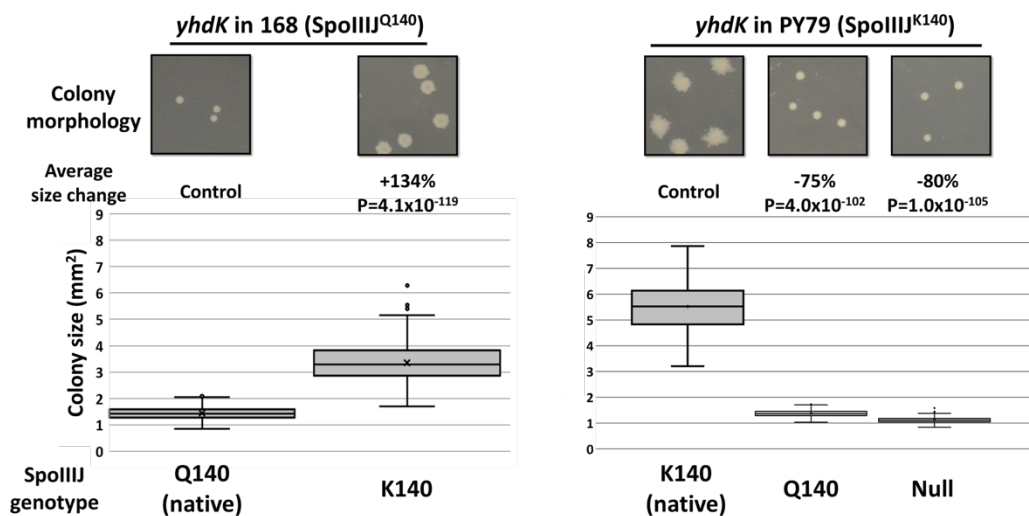

**Figure 2. Overexpression of SpoIIIJ increases tolerance of high  $\sigma^M$  activity.**

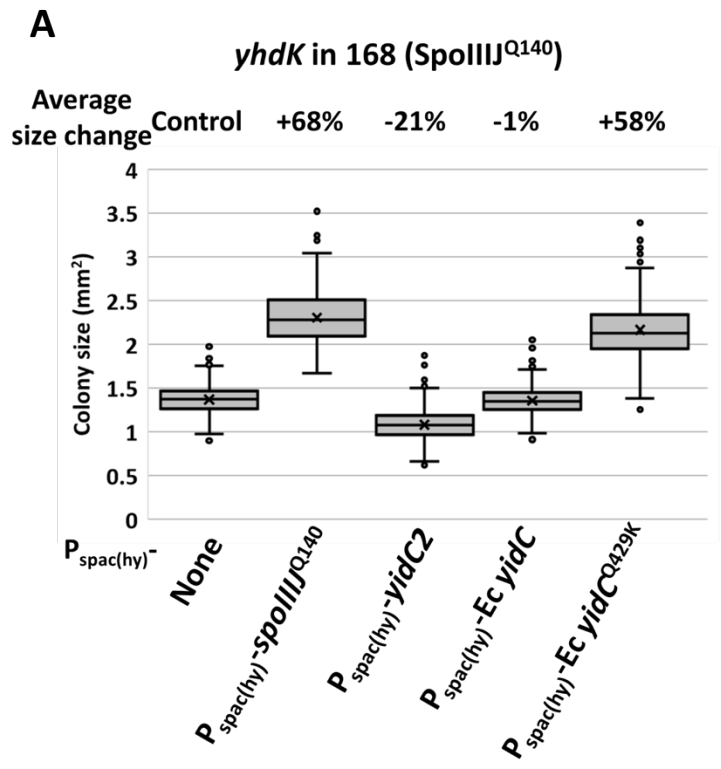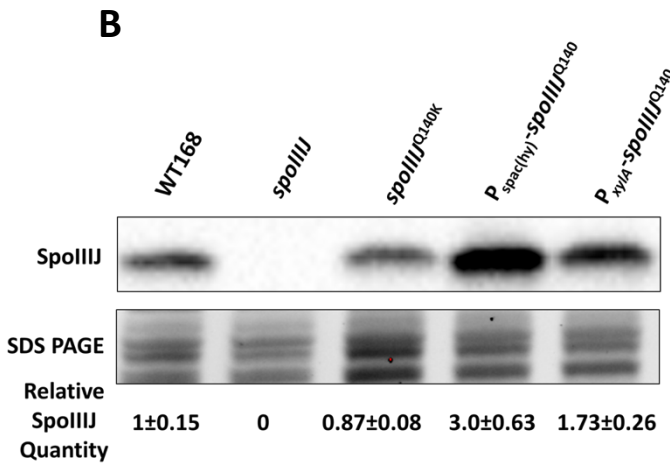

**Figure 3. Effects of different charge variants inside the SpoIIJ substrate binding groove**

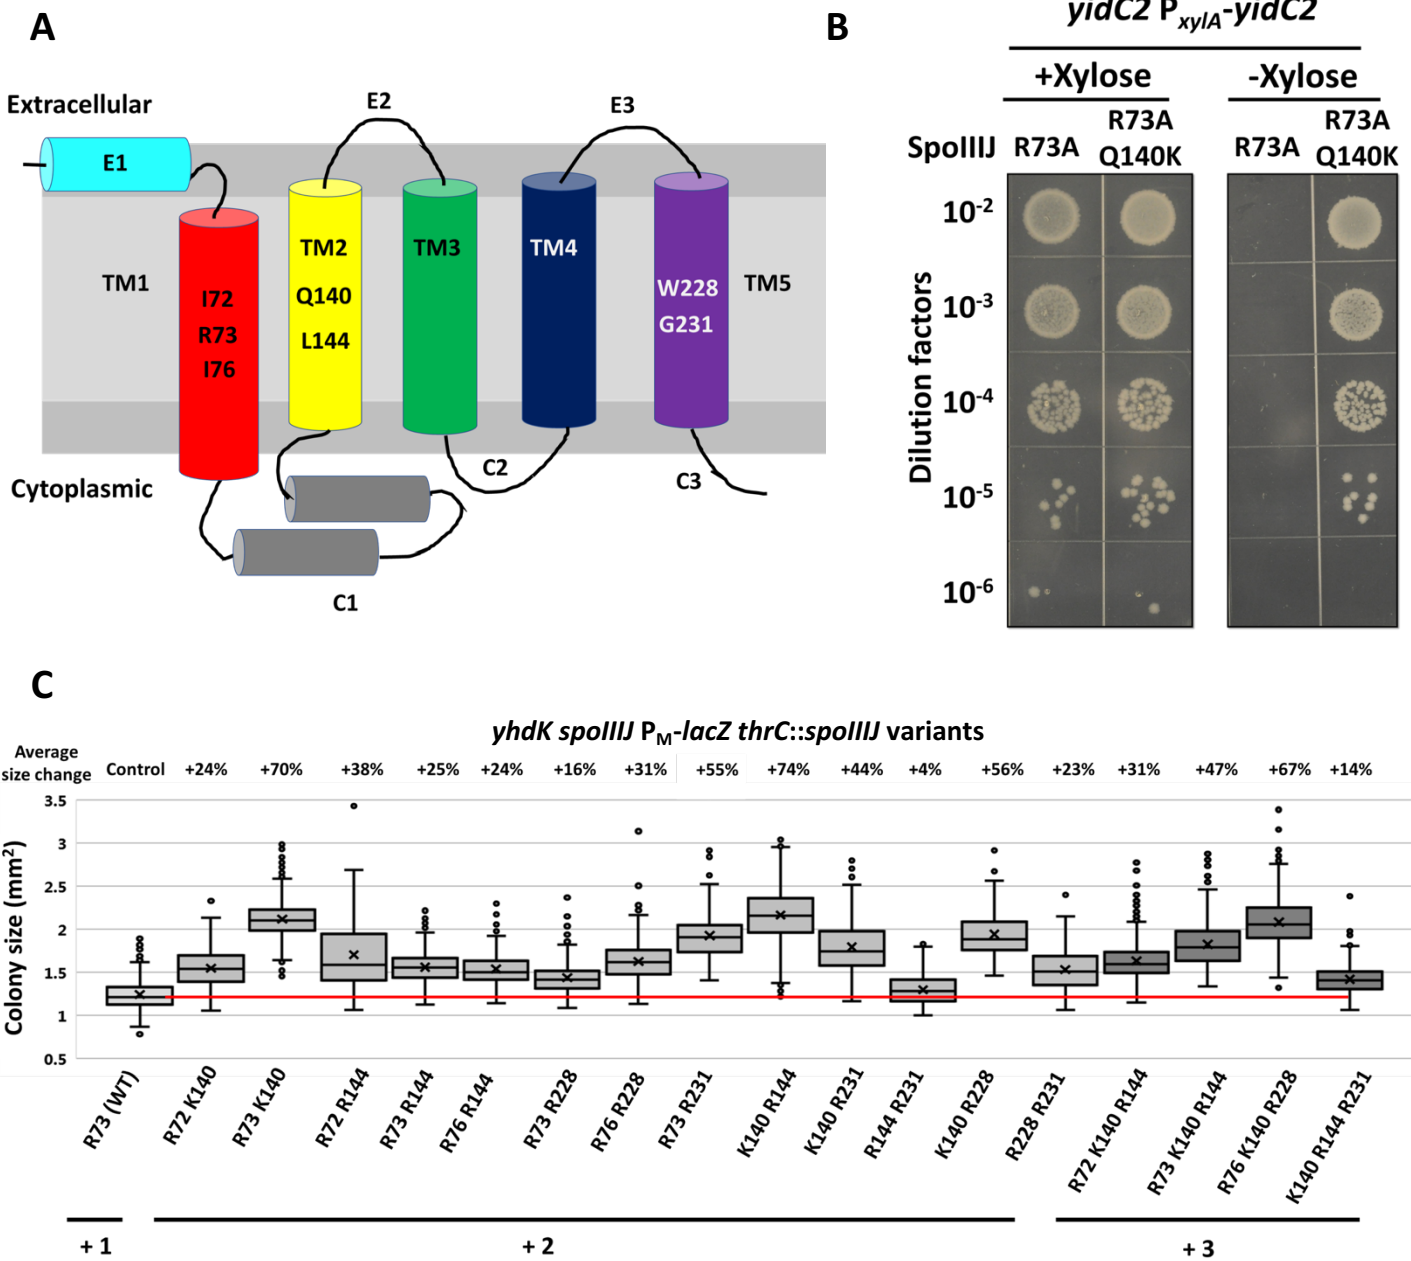

**Figure 3. Effects of different charge variants inside the SpoIIJ substrate binding groove**

**D**

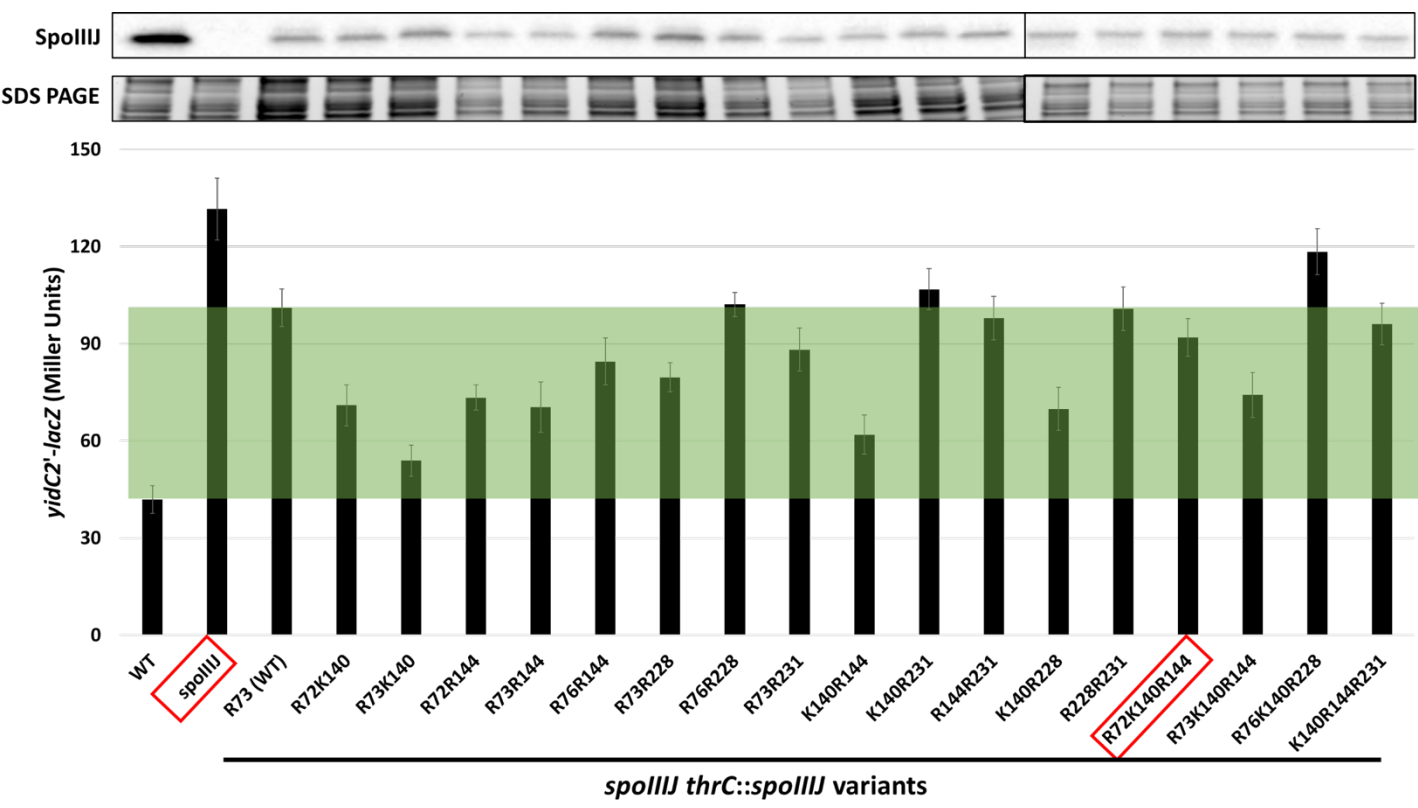

**Figure 4. High  $\sigma^M$  activity causes a cascade of stresses that can be partially compensated by its own regulon**

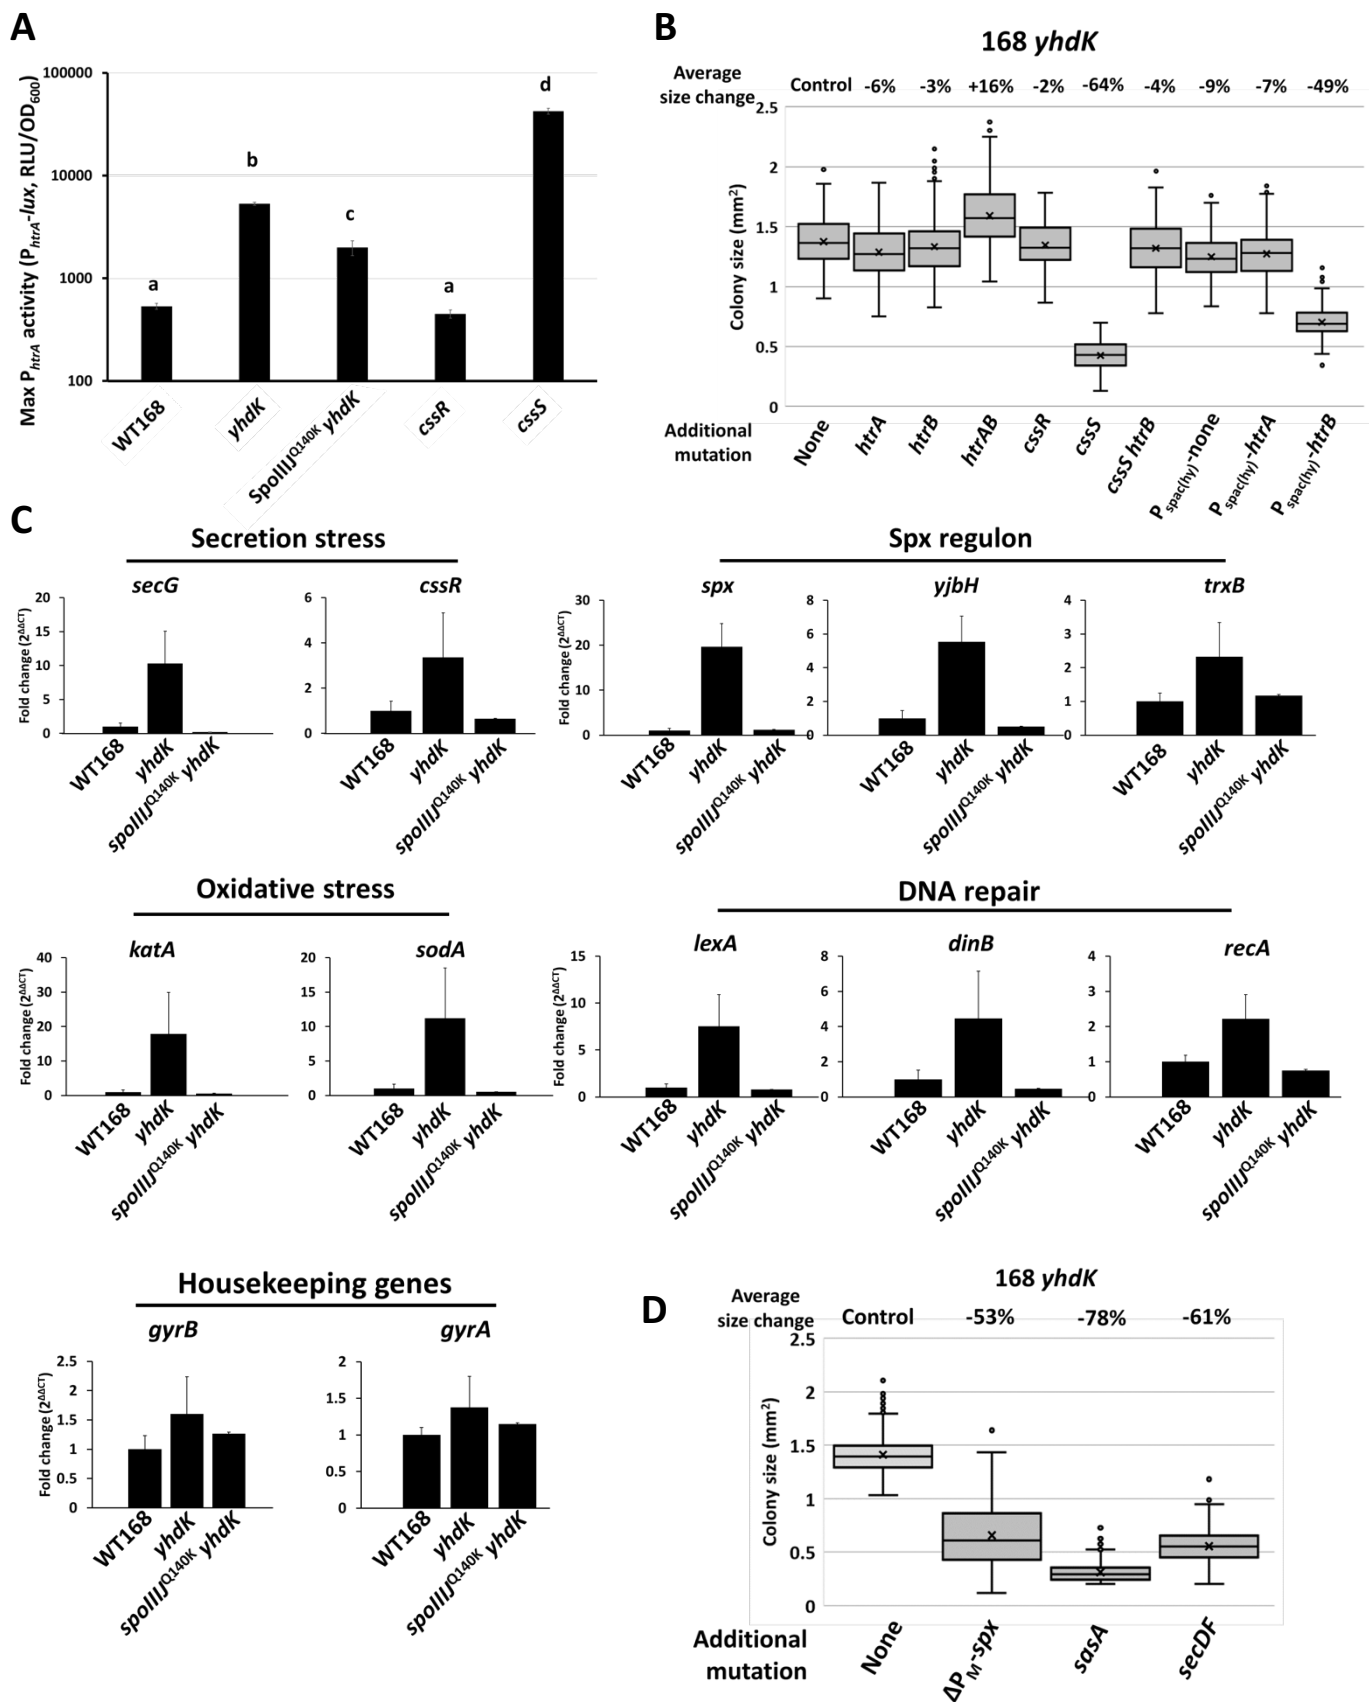

**Figure 4. High SigM activity causes a cascade of stresses that can be partially compensated by its regulon**

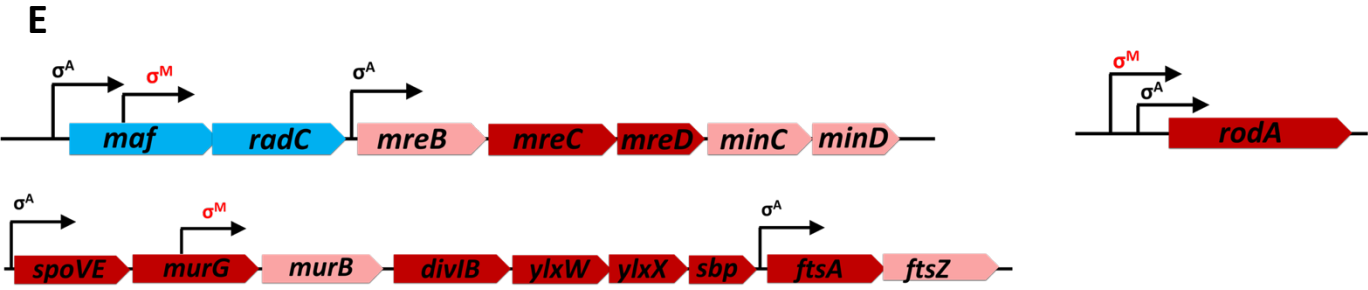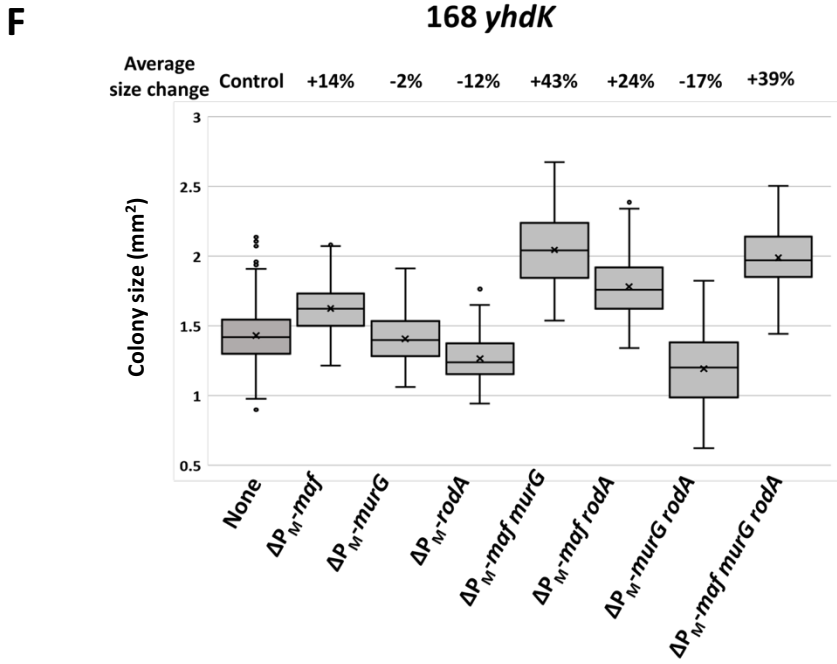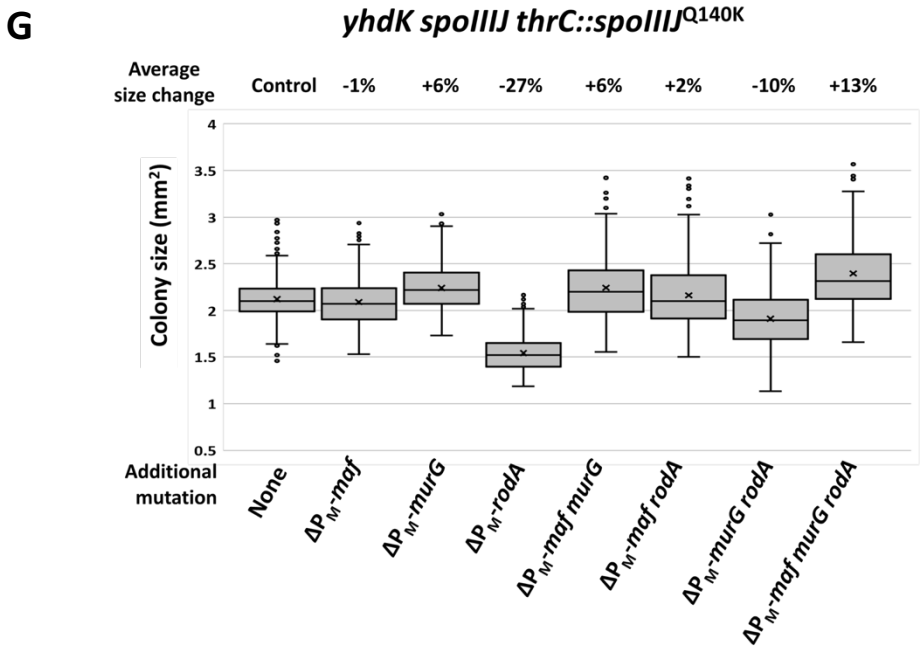

# Figure S1

A

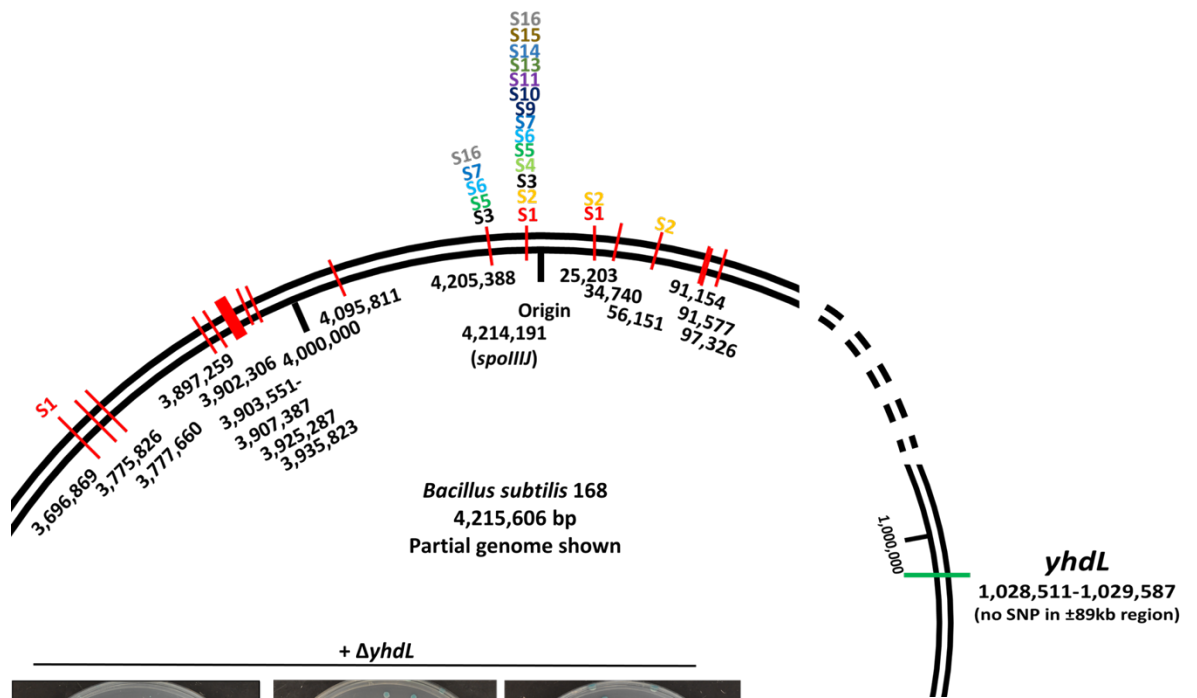

B

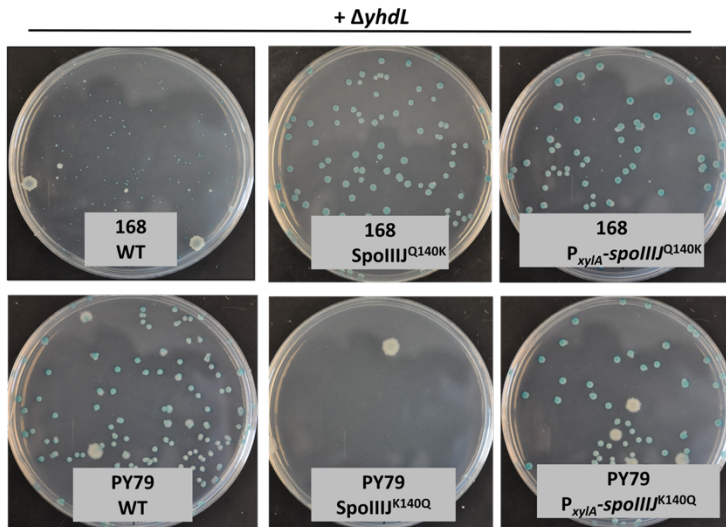

C

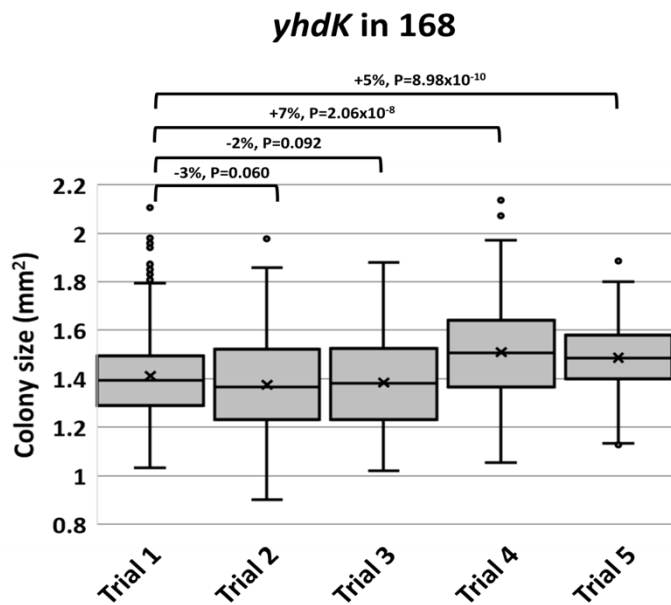



**Figure S2**

**A**

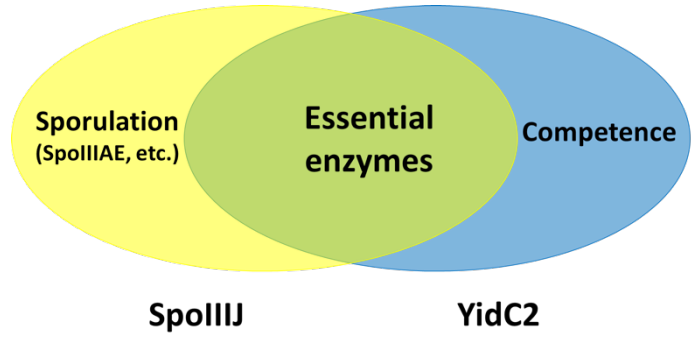

**B**

*yhdK* P<sub>spac(hy)</sub>-*yidC2*<sup>Q148K</sup>

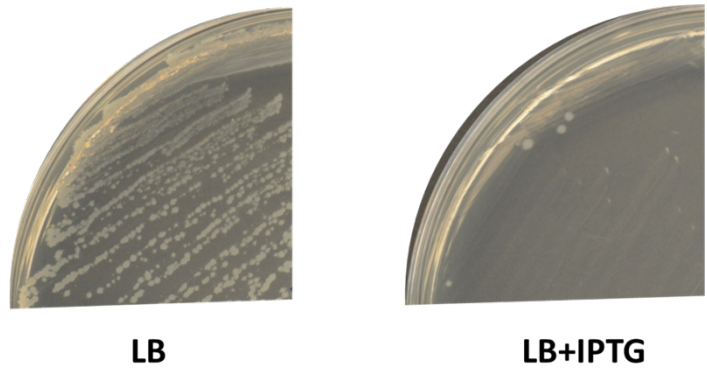

**C**

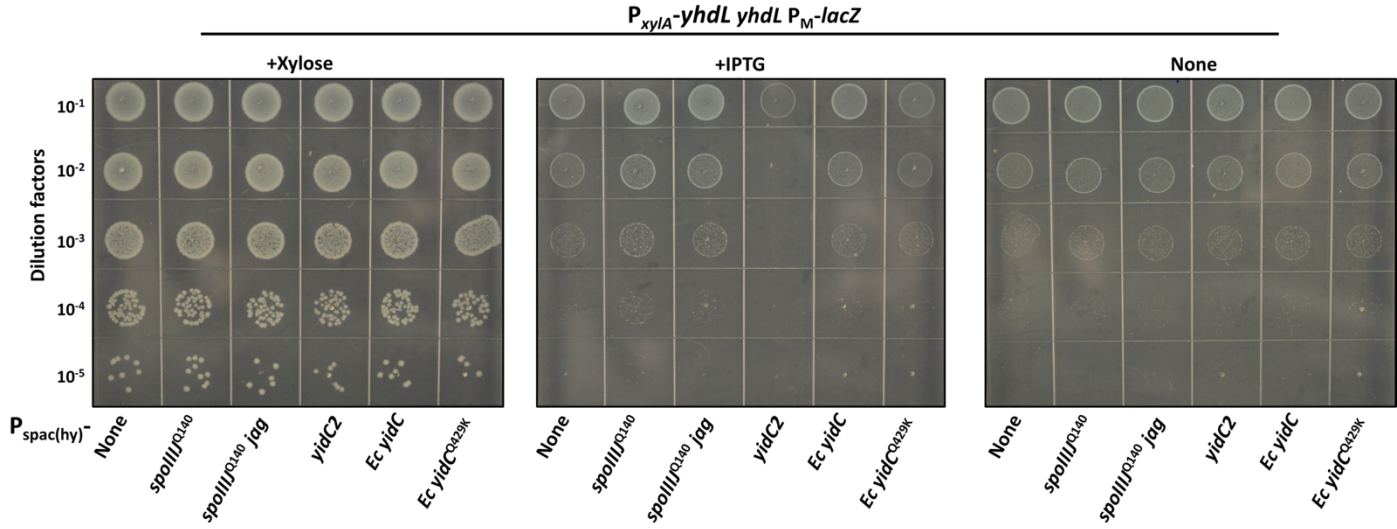

Figure S3

A

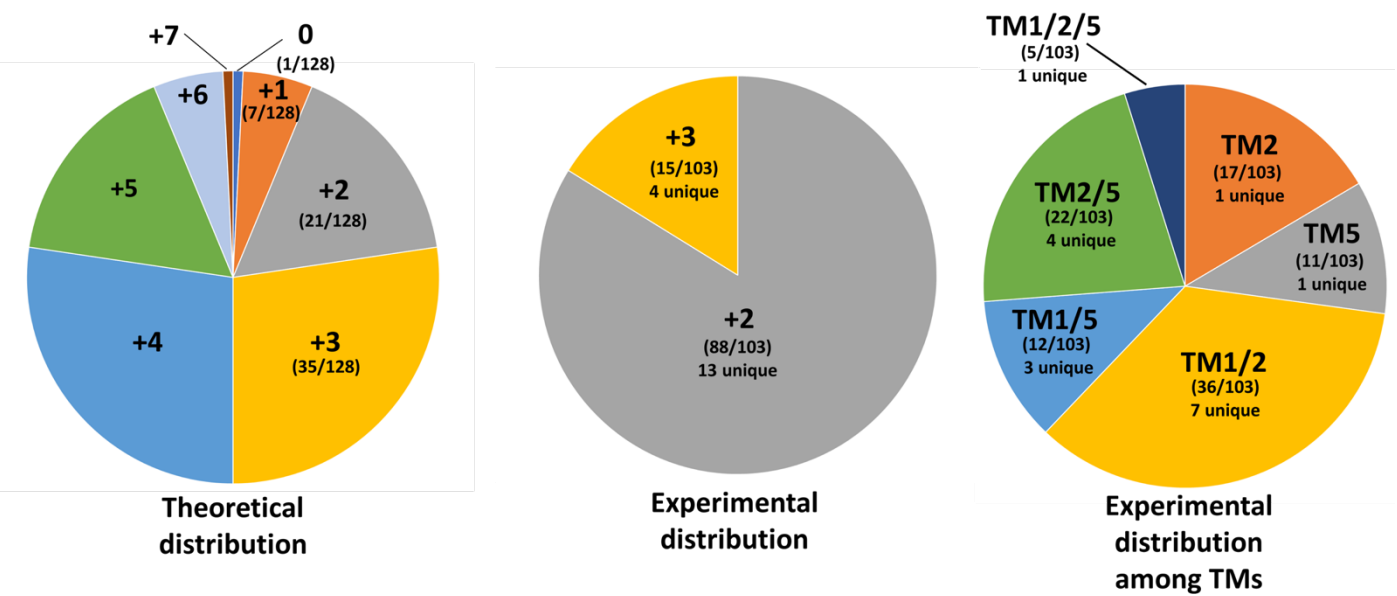

B

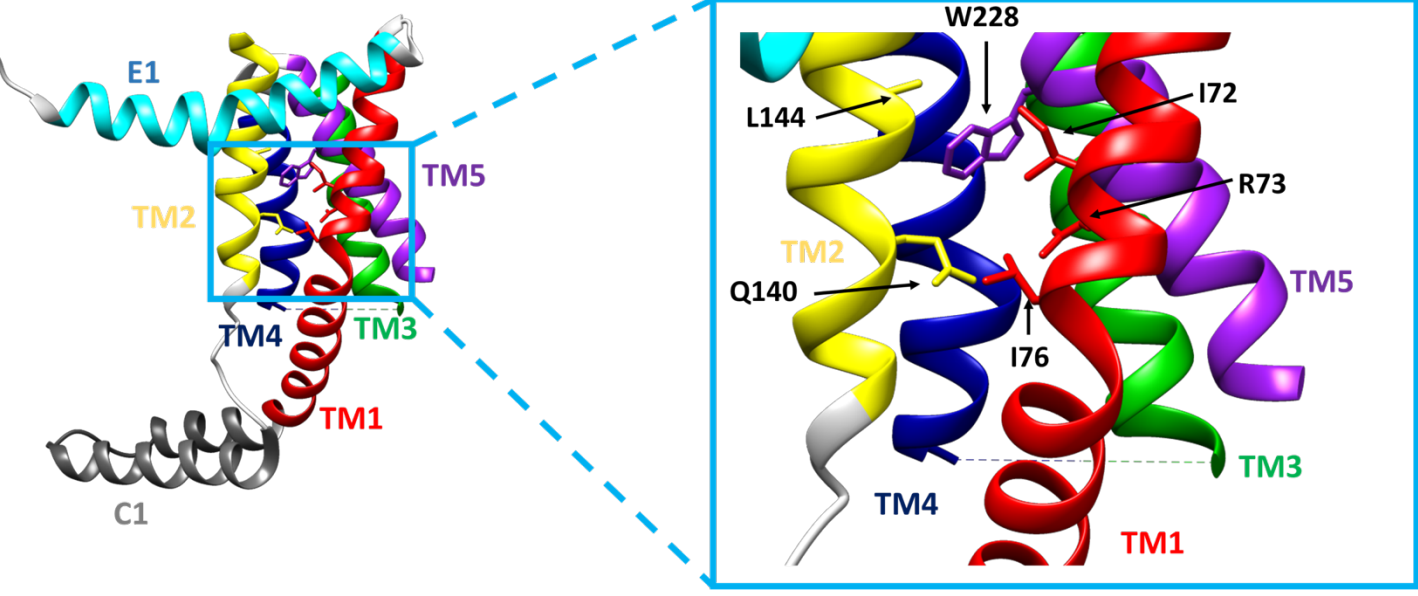

Figure S3

C

$P_{xyIA}$ -yhdL yhdL spoIIJ  
thrC::spoIIJ variants

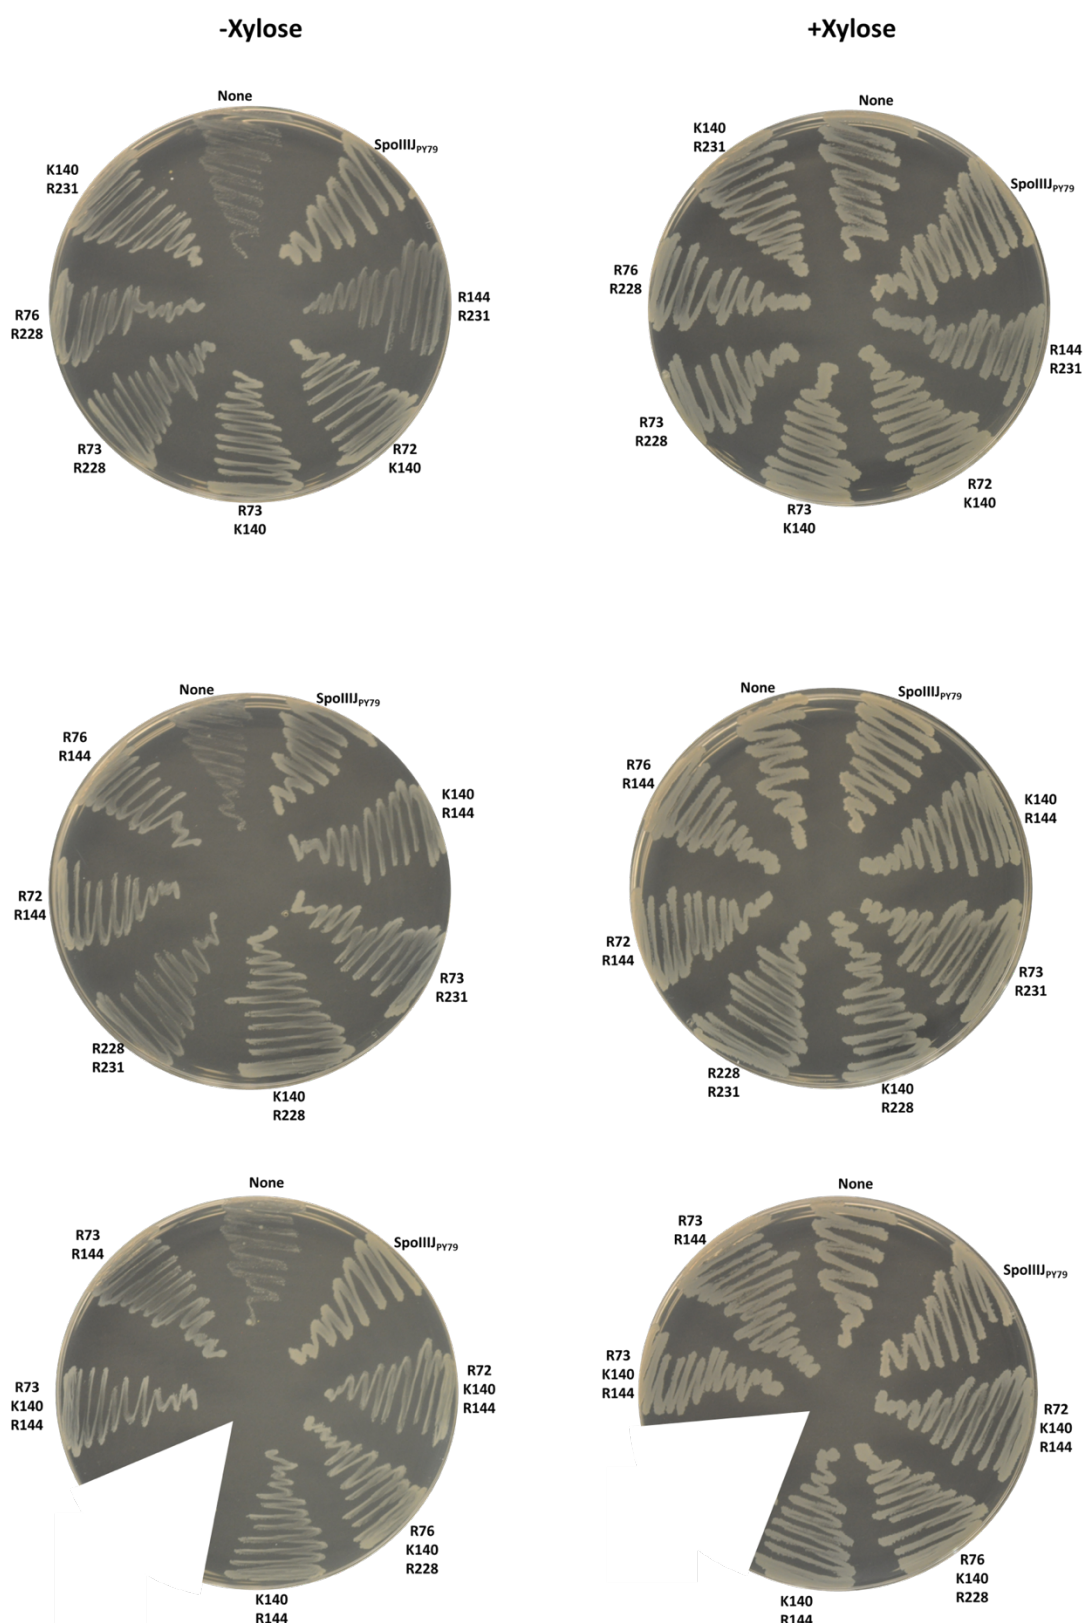

Figure S3

D

*spolIJ yidC2 P<sub>xylA</sub>-yidC2*

+Xyl

-Xyl

Dilution factors

None

*thrC::spolIJ*<sub>168</sub> (R73)

R144 R231

R72 K140

R73 K140

R73 R228

R76 R228

K140 R231

R76 R144

K140 R144

R73 R144

R73 R231

K140 R228

R228 R231

R72 R144

R72 K140 R144

R76 K140 R228

K140 R144 R231

R73 K140 R144

+1

+2

+3

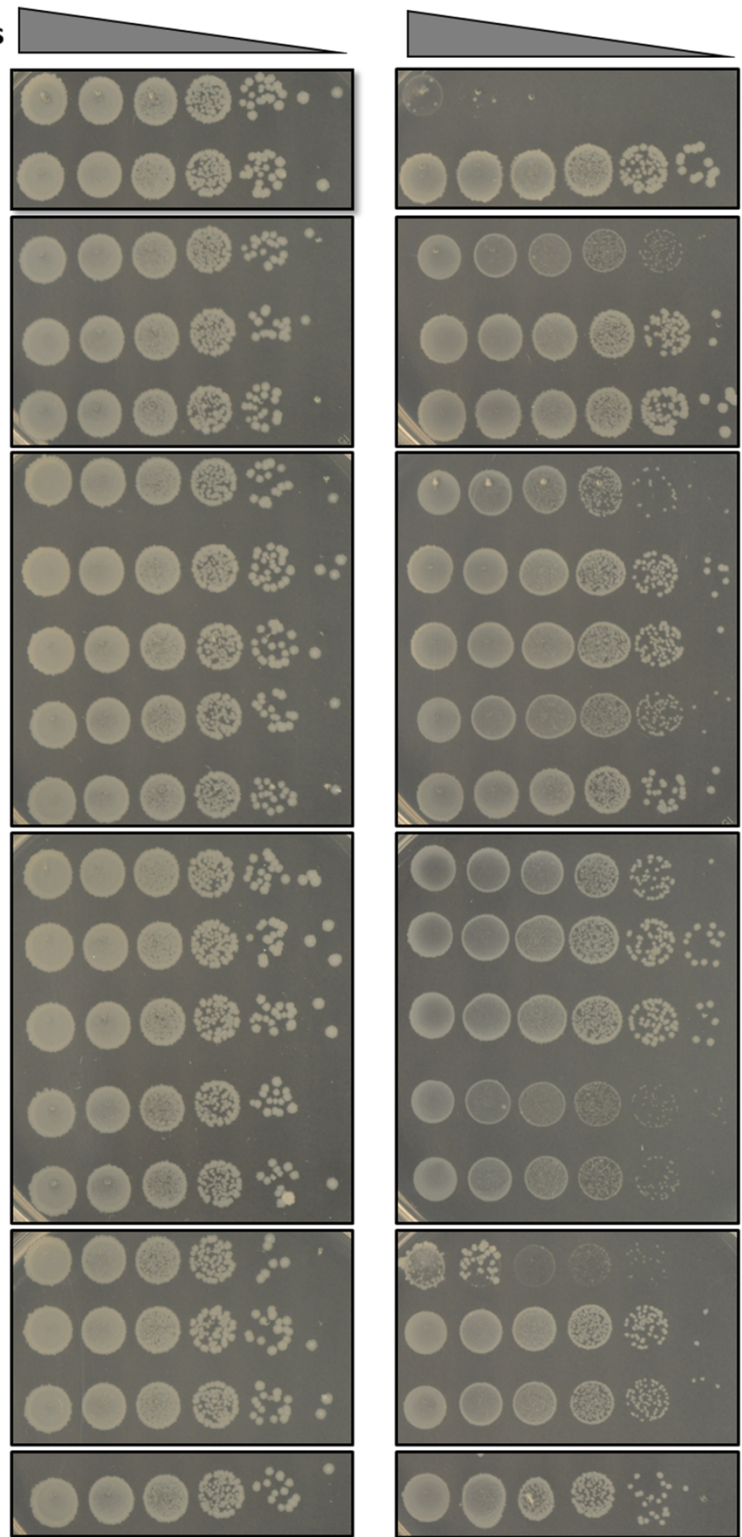



**Figure S4**

**A**

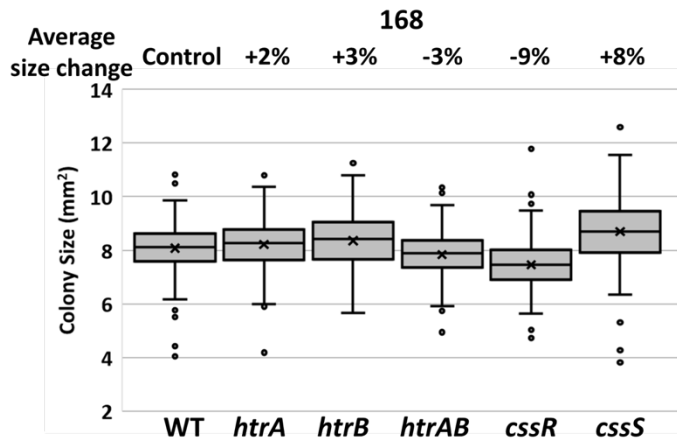

**B**

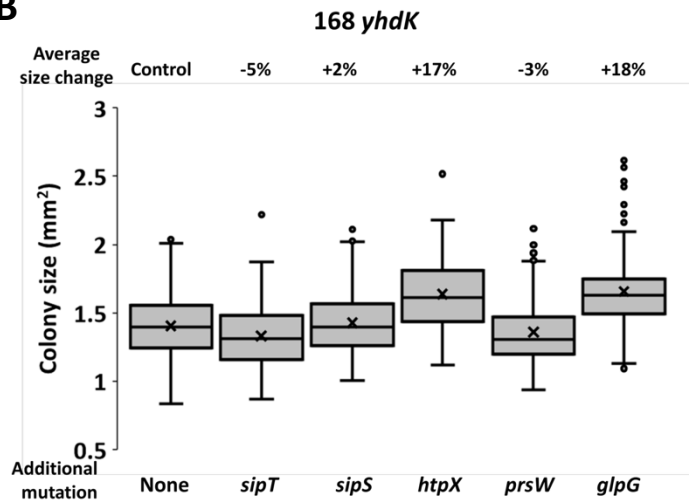

**C**

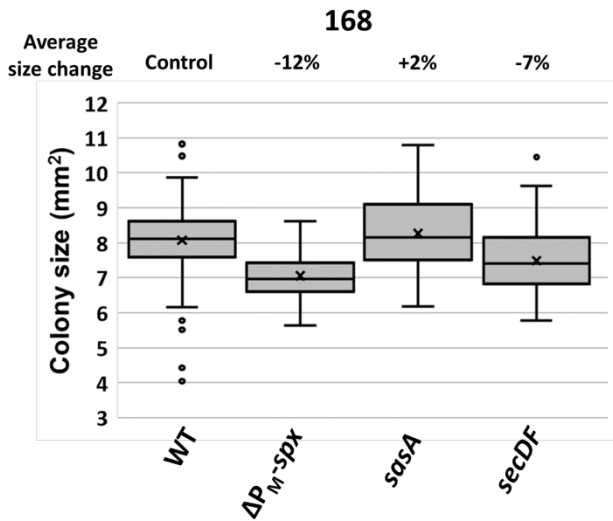

**D**

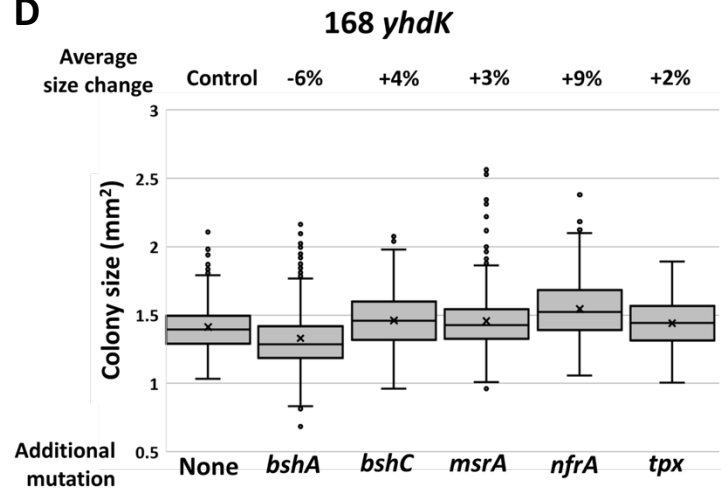

**E**

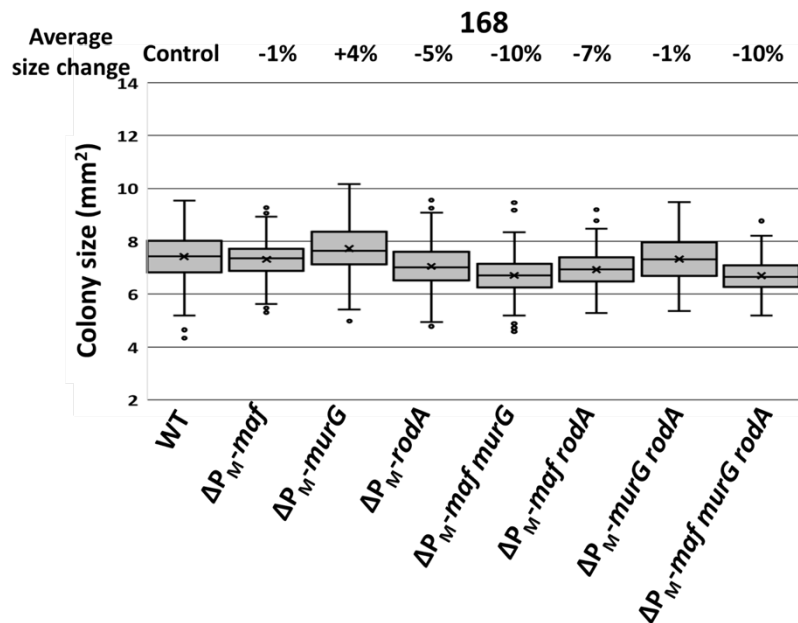



**Table S2. Whole genome sequencing of transformants generated by congression**

| Position      | Reference | Allele | Count | Coverage | Frequency | Gene           | DNA change        | Amino acid change |
|---------------|-----------|--------|-------|----------|-----------|----------------|-------------------|-------------------|
| <b>Supp-1</b> |           |        |       |          |           |                |                   |                   |
| 25203         | G         | A      | 72    | 75       | 96        |                |                   |                   |
| 96240         | G         | A      | 86    | 138      | 62.32     |                |                   |                   |
| 96260         | G         | A      | 65    | 122      | 53.28     |                |                   |                   |
| 486574        | T         | C      | 68    | 69       | 98.55     | <i>ydaO</i>    | 143T>C            | Ile48Thr          |
| 1297396       | G         | A      | 73    | 73       | 100       | <i>yjIA</i>    | 199C>T            | Pro67Ser          |
| 2277179       | A         | C      | 83    | 83       | 100       | <i>yokI</i>    | 243T>G            | Ile81Met          |
| 2277245       | GT        | AC     | 36    | 64       | 56.25     | <i>yokI</i>    | 176_177delACinsGT | Asp59Gly          |
| 3391676       | A         | G      | 41    | 41       | 100       | <i>gerAA</i>   | 895A>G            | Thr299Ala         |
| 3696869       | T         | C      | 97    | 97       | 100       | <i>pgdS</i>    | 630A>G            |                   |
| 4214191       | G         | T      | 63    | 63       | 100       | <i>spoIIIJ</i> | 418C>A            | Gln140Lys         |
| <b>Supp-2</b> |           |        |       |          |           |                |                   |                   |
| 25203         | G         | A      | 61    | 61       | 100       |                |                   |                   |
| 56151         | G         | A      | 67    | 67       | 100       | <i>spoVG</i>   | 286G>A            | Ala96Thr          |
| 455105        | T         | C      | 14    | 25       | 56        | <i>yczH</i>    | 156A>G            |                   |
| 4214191       | G         | T      | 50    | 50       | 100       | <i>spoIIIJ</i> | 418C>A            | Gln140Lys         |

| Position      | Reference    | Allele | Count | Coverage | Frequency | Gene           | DNA change | Amino acid change |
|---------------|--------------|--------|-------|----------|-----------|----------------|------------|-------------------|
| <b>Supp-3</b> |              |        |       |          |           |                |            |                   |
| 4205388       | G            | A      | 101   | 101      | 100       | <i>yycC</i>    | 489G>A     |                   |
| 4214191       | G            | T      | 60    | 60       | 100       | <i>spoIIIJ</i> | 418C>A     | Gln140Lys         |
| <b>Supp-4</b> |              |        |       |          |           |                |            |                   |
| 4214191       | G            | T      | 49    | 49       | 100       | <i>spoIIIJ</i> | 418C>A     | Gln140Lys         |
| <b>Supp-5</b> |              |        |       |          |           |                |            |                   |
| 2600044       | TATTGTATAATG | -      | 42    | 43       | 97.67     |                |            |                   |
| 4205388       | G            | A      | 79    | 79       | 100       | <i>yycC</i>    | 489G>A     |                   |
| 4214191       | G            | T      | 67    | 68       | 98.53     | <i>spoIIIJ</i> | 418C>A     | Gln140Lys         |
| <b>Supp-6</b> |              |        |       |          |           |                |            |                   |
| 4205388       | G            | A      | 97    | 97       | 100       | <i>yycC</i>    | 489G>A     |                   |
| 4214191       | G            | T      | 67    | 69       | 97.1      | <i>spoIIIJ</i> | 418C>A     | Gln140Lys         |



---

| Position | Reference | Allele | Count | Coverage | Frequency | Gene | DNA change | Amino acid change |
|----------|-----------|--------|-------|----------|-----------|------|------------|-------------------|
|----------|-----------|--------|-------|----------|-----------|------|------------|-------------------|

---

**Supp-7**

---

|         |   |   |    |    |     |                |        |           |
|---------|---|---|----|----|-----|----------------|--------|-----------|
| 4205388 | G | A | 72 | 72 | 100 | <i>yycC</i>    | 489G>A |           |
| 4214191 | G | T | 47 | 47 | 100 | <i>spoIIIJ</i> | 418C>A | Gln140Lys |

---

**Supp-9**

---

|         |   |   |    |    |     |                |        |  |
|---------|---|---|----|----|-----|----------------|--------|--|
| 4214191 | G | T | 11 | 11 | 100 | <i>spoIIIJ</i> | 418C>A |  |
|---------|---|---|----|----|-----|----------------|--------|--|

---

**Supp-10**

---

|         |   |   |    |    |     |                |        |           |
|---------|---|---|----|----|-----|----------------|--------|-----------|
| 4214191 | G | T | 51 | 51 | 100 | <i>spoIIIJ</i> | 418C>A | Gln140Lys |
|---------|---|---|----|----|-----|----------------|--------|-----------|

---

**Supp-11**

---

|         |   |   |    |    |      |                |        |           |
|---------|---|---|----|----|------|----------------|--------|-----------|
| 2002473 | T | G | 85 | 87 | 97.7 |                |        |           |
| 4214191 | G | T | 71 | 71 | 100  | <i>spoIIIJ</i> | 418C>A | Gln140Lys |

---

**Supp-12**

---

|         |   |   |    |    |      |  |  |  |
|---------|---|---|----|----|------|--|--|--|
| 2707867 | A | C | 59 | 86 | 68.6 |  |  |  |
|---------|---|---|----|----|------|--|--|--|

---

| Position       | Reference | Allele | Count | Coverage | Frequency | Gene           | DNA change        | Amino acid change |
|----------------|-----------|--------|-------|----------|-----------|----------------|-------------------|-------------------|
| <b>Supp-13</b> |           |        |       |          |           |                |                   |                   |
| 3810012        | G         | A      | 128   | 129      | 99.22     |                |                   |                   |
| 4214191        | G         | T      | 47    | 47       | 100       | <i>spoIIIJ</i> | 418C>A            | Gln140Lys         |
| <b>Supp-14</b> |           |        |       |          |           |                |                   |                   |
| 96240          | G         | A      | 16    | 17       | 94.12     |                |                   |                   |
| 96260          | G         | A      | 13    | 14       | 92.86     |                |                   |                   |
| 775706         | -         | T      | 18    | 32       | 56.25     | <i>yesZ</i>    | 907_908insT       | Ala303fs          |
| 775707         | C         | T      | 18    | 32       | 56.25     | <i>yesZ</i>    | 909C>T            |                   |
| 775710         | -         | T      | 17    | 33       | 51.52     | <i>yesZ</i>    | 911_912insT       | Leu305fs          |
| 775721         | CC        | AA     | 12    | 28       | 42.86     | <i>yesZ</i>    | 923_924delCCinsAA | Ser308*           |
| 1013666        | G         | T      | 15    | 28       | 53.57     | <i>nsrR</i>    | 186C>A            |                   |
| 1855412        | A         | T      | 17    | 34       | 50        | <i>pksR</i>    | 4523A>T           | Asn1508Ile        |
| 1855416        | A         | T      | 18    | 36       | 50        | <i>pksR</i>    | 4527A>T           | Gln1509His        |
| 1855428        | T         | G      | 21    | 40       | 52.5      | <i>pksR</i>    | 4539T>G           | Ile1513Met        |
| 2129223        | G         | C      | 37    | 37       | 100       | <i>yodE</i>    | 771C>G            |                   |
| 2846430        | T         | A      | 11    | 21       | 52.38     | <i>nadA</i>    | 632A>T            | Glu211Val         |

| Position                      | Reference | Allele | Count | Coverage | Frequency | Gene           | DNA change        | Amino acid change |
|-------------------------------|-----------|--------|-------|----------|-----------|----------------|-------------------|-------------------|
| <b>Supp-14</b><br>(continued) |           |        |       |          |           |                |                   |                   |
| 3510969                       | AA        | GC     | 14    | 41       | 34.15     | <i>yvfH</i>    | 190_191delAAinsGC | Lys64Ala          |
| 3510977                       | G         | A      | 21    | 40       | 52.5      | <i>yvfH</i>    | 198G>A            |                   |
| 3510979                       | T         | A      | 20    | 40       | 50        | <i>yvfH</i>    | 200T>A            | Met67Lys          |
| 4214191                       | G         | T      | 31    | 31       | 100       | <i>spoIIIJ</i> | 418C>A            | Gln140Lys         |
| <b>Supp-15</b>                |           |        |       |          |           |                |                   |                   |
| 1976137                       | C         | T      | 134   | 134      | 100       | <i>ppsC</i>    | 6412G>A           | Asp2138Asn        |
| 4214191                       | G         | T      | 49    | 49       | 100       | <i>spoIIIJ</i> | 418C>A            | Gln140Lys         |
| <b>Supp-16</b>                |           |        |       |          |           |                |                   |                   |
| 4205388                       | G         | A      | 93    | 94       | 98.94     | <i>yyaC</i>    | 489G>A            |                   |
| 4214191                       | G         | T      | 59    | 59       | 100       | <i>spoIIIJ</i> | 418C>A            | Gln140Lys         |

\*Suppressor 8 is not listed here as it contains over 900 SNPs compared with strain 168, and is possibly a contamination of PY79 endospore that survived genomic DNA extraction.

**Table S3. Amino acid substitutions in SpoIIIJ variants selected in *yhdL* depletion strain**

| Suppressor | Total Charge | T119G<br>(Ile72Arg) | A122G<br>(Gln73Arg) | T131G<br>(Ile76Arg) | C322A<br>(Gln140Lys) | T335G<br>(Leu144Arg) | T586C<br>(Trp228Arg) | G595C<br>(Gly231Arg) |
|------------|--------------|---------------------|---------------------|---------------------|----------------------|----------------------|----------------------|----------------------|
| 1          | 3            |                     |                     |                     | 1                    | 1                    |                      | 1                    |
| 2          | 2            |                     |                     |                     |                      |                      | 1                    | 1                    |
| 3          | 2            |                     |                     |                     | 1                    | 1                    |                      |                      |
| 4          | 2            |                     |                     |                     |                      | 1                    |                      | 1                    |
| 5          | 2            |                     |                     |                     |                      |                      | 1                    | 1                    |
| 6          | 3            | 1                   |                     |                     | 1                    | 1                    |                      |                      |
| 7          | 3            | 1                   |                     |                     | 1                    | 1                    |                      |                      |
| 8          | 2            | 1                   |                     |                     | 1                    |                      |                      |                      |
| 9          | 2            |                     | 1                   |                     |                      |                      | 1                    |                      |
| 10         | 2            | 1                   |                     |                     | 1                    |                      |                      |                      |
| 11         | 2            |                     | 1                   |                     | 1                    |                      |                      |                      |
| 12         | 2            |                     |                     |                     | 1                    |                      | 1                    |                      |
| 13         | 2            | 1                   |                     |                     | 1                    |                      |                      |                      |
| 14         | 2            |                     |                     | 1                   |                      | 1                    |                      |                      |
| 15         | 2            |                     |                     | 1                   |                      |                      | 1                    |                      |
| 16         | 2            |                     |                     |                     | 1                    |                      | 1                    |                      |
| 17         | 2            |                     |                     |                     | 1                    |                      | 1                    |                      |
| 18         | 2            |                     |                     |                     |                      |                      | 1                    | 1                    |
| 19         | 3            |                     |                     |                     | 1                    | 1                    |                      | 1                    |
| 20         | 2            |                     | 1                   |                     |                      |                      | 1                    |                      |
| 21         | 3            |                     |                     | 1                   | 1                    |                      | 1                    |                      |
| 22         | 2            |                     |                     |                     |                      |                      | 1                    | 1                    |
| 23         | 2            |                     | 1                   |                     |                      |                      | 1                    |                      |
| 24         | 2            |                     |                     | 1                   |                      |                      | 1                    |                      |
| 25         | 2            |                     |                     |                     |                      |                      | 1                    | 1                    |
| 26         | 2            |                     |                     |                     | 1                    |                      | 1                    |                      |
| 27         | 2            | 1                   |                     |                     | 1                    |                      |                      |                      |
| 28         | 3            |                     |                     | 1                   | 1                    |                      | 1                    |                      |
| 29         | 2            |                     | 1                   |                     | 1                    |                      |                      |                      |
| 30         | 2            |                     | 1                   |                     |                      |                      | 1                    |                      |
| 31         | 2            | 1                   |                     |                     | 1                    |                      |                      |                      |
| 32         | 2            |                     |                     |                     | 1                    |                      |                      | 1                    |
| 33         | 3            | 1                   |                     |                     | 1                    | 1                    |                      |                      |
| 34         | 2            |                     |                     |                     |                      |                      | 1                    | 1                    |
| 35         | 2            |                     |                     | 1                   |                      |                      | 1                    |                      |
| 36         | 2            |                     |                     | 1                   |                      | 1                    |                      |                      |
| 37         | 3            |                     |                     |                     | 1                    | 1                    |                      | 1                    |
| 38         | 2            |                     |                     |                     | 1                    | 1                    |                      |                      |
| 39         | 2            |                     |                     | 1                   |                      | 1                    |                      |                      |
| 40         | 2            |                     | 1                   |                     |                      | 1                    |                      |                      |
| 41         | 2            |                     |                     |                     | 1                    |                      |                      | 1                    |

| Suppressor | Total Charge | T119G<br>(Ile72Arg) | A122G<br>(Gln73Arg) | T131G<br>(Ile76Arg) | C322A<br>(Gln140Lys) | T335G<br>(Leu144Arg) | T586C<br>(Trp228Arg) | G595C<br>(Gly231Arg) |
|------------|--------------|---------------------|---------------------|---------------------|----------------------|----------------------|----------------------|----------------------|
| 42         | 2            |                     | 1                   |                     |                      |                      |                      | 1                    |
| 43         | 2            |                     |                     | 1                   |                      | 1                    |                      |                      |
| 44         | 2            |                     |                     |                     | 1                    | 1                    |                      |                      |
| 45         | 2            |                     |                     | 1                   |                      | 1                    |                      |                      |
| 46         | 2            | 1                   |                     |                     |                      | 1                    |                      |                      |
| 47         | 2            | 1                   |                     |                     | 1                    |                      |                      |                      |
| 48         | 2            |                     |                     |                     |                      |                      | 1                    | 1                    |
| 49         | 2            |                     | 1                   |                     | 1                    |                      |                      |                      |
| 50         | 2            |                     | 1                   |                     |                      |                      | 1                    |                      |
| 51         | 2            |                     |                     |                     | 1                    |                      | 1                    |                      |
| 52         | 2            | 1                   |                     |                     | 1                    |                      |                      |                      |
| 53         | 2            |                     |                     |                     | 1                    |                      | 1                    |                      |
| 54         | 2            |                     |                     |                     | 1                    |                      | 1                    |                      |
| 55         | 2            |                     |                     |                     | 1                    |                      | 1                    |                      |
| 56         | 2            |                     |                     |                     |                      |                      | 1                    | 1                    |
| 57         | 2            |                     |                     |                     | 1                    |                      | 1                    |                      |
| 58         | 2            |                     |                     |                     | 1                    |                      |                      | 1                    |
| 59         | 3            |                     |                     | 1                   | 1                    |                      | 1                    |                      |
| 60         | 2            | 1                   |                     |                     |                      | 1                    |                      |                      |
| 61         | 2            |                     |                     |                     | 1                    |                      | 1                    |                      |
| 62         | 2            |                     |                     |                     |                      |                      | 1                    | 1                    |
| 63         | 2            |                     |                     |                     | 1                    | 1                    |                      |                      |
| 64         | 2            |                     |                     | 1                   |                      | 1                    |                      |                      |
| 65         | 2            |                     | 1                   |                     |                      | 1                    |                      |                      |
| 66         | 3            |                     |                     | 1                   | 1                    |                      | 1                    |                      |
| 67         | 2            |                     |                     |                     | 1                    | 1                    |                      |                      |
| 68         | 2            |                     | 1                   |                     | 1                    |                      |                      |                      |
| 69         | 2            |                     |                     |                     |                      |                      | 1                    | 1                    |
| 70         | 2            |                     |                     |                     | 1                    | 1                    |                      |                      |
| 71         | 2            |                     |                     |                     | 1                    | 1                    |                      |                      |
| 72         | 2            |                     |                     |                     |                      |                      | 1                    | 1                    |
| 73         | 2            |                     |                     |                     | 1                    |                      | 1                    |                      |
| 74         | 2            |                     | 1                   |                     |                      | 1                    |                      |                      |
| 75         | 2            |                     |                     |                     | 1                    |                      | 1                    |                      |
| 76         | 2            |                     |                     |                     | 1                    | 1                    |                      |                      |
| 77         | 2            |                     |                     |                     | 1                    |                      | 1                    |                      |
| 78         | 2            |                     |                     |                     | 1                    | 1                    |                      |                      |
| 79         | 2            |                     |                     |                     | 1                    |                      | 1                    |                      |
| 80         | 2            |                     |                     |                     | 1                    | 1                    |                      |                      |
| 81         | 2            |                     |                     | 1                   |                      |                      | 1                    |                      |
| 82         | 2            | 1                   |                     |                     | 1                    |                      |                      |                      |
| 83         | 2            |                     |                     |                     | 1                    | 1                    |                      |                      |
| 84         | 2            | 1                   |                     |                     | 1                    |                      |                      |                      |

| Suppressor | Total Charge | T119G<br>(Ile72Arg) | A122G<br>(Gln73Arg) | T131G<br>(Ile76Arg) | C322A<br>(Gln140Lys) | T335G<br>(Leu144Arg) | T586C<br>(Trp228Arg) | G595C<br>(Gly231Arg) |
|------------|--------------|---------------------|---------------------|---------------------|----------------------|----------------------|----------------------|----------------------|
| 85         | 2            |                     | 1                   |                     |                      |                      | 1                    |                      |
| 86         | 2            |                     |                     |                     | 1                    | 1                    |                      |                      |
| 87         | 2            |                     | 1                   |                     |                      |                      | 1                    |                      |
| 88         | 2            |                     |                     |                     | 1                    | 1                    |                      |                      |
| 89         | 2            |                     |                     |                     | 1                    | 1                    |                      |                      |
| 90         | 2            |                     |                     |                     | 1                    |                      | 1                    |                      |
| 91         | 2            |                     |                     |                     | 1                    | 1                    |                      |                      |
| 92         | 2            | 1                   |                     |                     | 1                    |                      |                      |                      |
| 93         | 2            |                     | 1                   |                     | 1                    |                      |                      |                      |
| 94         | 2            |                     |                     | 1                   |                      | 1                    |                      |                      |
| 95         | 3            |                     | 1                   |                     | 1                    | 1                    |                      |                      |
| 96         | 3            |                     |                     | 1                   | 1                    |                      | 1                    |                      |
| 97         | 2            |                     |                     |                     | 1                    | 1                    |                      |                      |
| 98         | 3            |                     | 1                   |                     | 1                    | 1                    |                      |                      |
| 99         | 2            |                     |                     |                     | 1                    | 1                    |                      |                      |
| 100        | 2            |                     | 1                   |                     | 1                    |                      |                      |                      |
| 101        | 2            |                     |                     | 1                   |                      | 1                    |                      |                      |
| 102        | 2            | 1                   |                     |                     |                      | 1                    |                      |                      |
| 103        | 3            |                     | 1                   |                     | 1                    | 1                    |                      |                      |

**Table S4. Secreted and membrane-associated proteins in the  $\sigma^M$  regulon**

| <b>Locus</b> | <b>Gene</b>  | <b>Protein Localization</b>        | <b>Number of predicted transmembrane segments</b> |
|--------------|--------------|------------------------------------|---------------------------------------------------|
| BSU00570     | <i>yabM</i>  | cytoplasmic membrane               | 14                                                |
| BSU00600     | <i>yabP</i>  | forespore outer membrane           | Unknown                                           |
| BSU00610     | <i>yabQ</i>  | forespore outer membrane           | 6                                                 |
| BSU00620     | <i>divIC</i> | peripheral membrane protein        | Peripheral                                        |
| BSU00690     | <i>ftsH</i>  | cytoplasmic membrane               | 2                                                 |
| BSU02900     | <i>yceD</i>  | peripheral membrane protein        | Peripheral                                        |
| BSU02920     | <i>yceF</i>  | cytoplasmic membrane               | 6                                                 |
| BSU03240     | <i>ycgQ</i>  | cytoplasmic membrane               | 4                                                 |
| BSU03250     | <i>ycgR</i>  | cytoplasmic membrane               | 8                                                 |
| BSU04230     | <i>amj</i>   | cytoplasmic membrane               | 7                                                 |
| BSU06380     | <i>yebC</i>  | cytoplasmic membrane               | 5                                                 |
| BSU09500     | <i>yhdK</i>  | cytoplasmic membrane               | 3                                                 |
| BSU09510     | <i>yhdL</i>  | cytoplasmic membrane               | 1                                                 |
| BSU15220     | <i>murG</i>  | peripheral membrane protein        | Peripheral                                        |
| BSU15240     | <i>divIB</i> | cytoplasmic membrane               | 1                                                 |
| BSU15250     | <i>ylxW</i>  | Integral membrane protein          | Unknown                                           |
| BSU15260     | <i>ylxX</i>  | cytoplasmic membrane               | 1                                                 |
| BSU15270     | <i>sbp</i>   | cytoplasmic membrane               | 3                                                 |
| BSU15280     | <i>ftsA</i>  | cytoplasmic membrane and cytoplasm | Peripheral                                        |
| BSU15290     | <i>ftsZ</i>  | cytoplasmic membrane and cytoplasm | Peripheral                                        |
| BSU18190     | <i>yngC</i>  | cytoplasmic membrane               | 4                                                 |
| BSU21920     | <i>ugtP</i>  | peripheral membrane protein        | Peripheral                                        |
| BSU22320     | <i>ponA</i>  | cytoplasmic membrane               | 1                                                 |
| BSU27160     | <i>yrhJ</i>  | cytoplasmic membrane               | Unknown                                           |
| BSU27650     | <i>secDF</i> | cytoplasmic membrane               | 12                                                |
| BSU27990     | <i>minD</i>  | peripheral membrane protein        | Peripheral                                        |
| BSU28000     | <i>minC</i>  | peripheral membrane protein        | Peripheral                                        |
| BSU28010     | <i>mreD</i>  | cytoplasmic membrane               | 5                                                 |
| BSU28020     | <i>mreC</i>  | cytoplasmic membrane               | 1                                                 |
| BSU28030     | <i>mreB</i>  | peripheral membrane protein        | Peripheral                                        |
| BSU35650     | <i>tagU</i>  | cytoplasmic membrane               | 1                                                 |
| BSU35840     | <i>tagT</i>  | cytoplasmic membrane               | 1                                                 |
| BSU36530     | <i>bcrC</i>  | cytoplasmic membrane               | 4                                                 |
| BSU38120     | <i>rodA</i>  | cytoplasmic membrane               | 11                                                |
| BSU38260     | <i>efeB</i>  | Secreted protein                   | Secreted                                          |
| BSU38270     | <i>efeO</i>  | cytoplasmic membrane               | Peripheral                                        |
| BSU38280     | <i>efeU</i>  | cytoplasmic membrane               | 6                                                 |
| BSU38510     | <i>dltB</i>  | cytoplasmic membrane               | 10                                                |

**Table S5. *Bacillus subtilis* strains used in this study**

| Number  | Genotype                                                                        | Note                                                                                                                                      |
|---------|---------------------------------------------------------------------------------|-------------------------------------------------------------------------------------------------------------------------------------------|
| HB16780 | $\Delta P_M\text{-}murG$                                                        | Mutated sigM promoter inside <i>murG</i> gene using vector pMutin4                                                                        |
| HB16812 | $\Delta P_M\text{-}murG \Delta P_M\text{-}maf$                                  |                                                                                                                                           |
| HB17934 | $\Delta P_M\text{-}maf$                                                         | Mutated sigM promoter inside <i>maf</i> gene using vector pMutin4                                                                         |
| HB18905 | <i>spx::P<sub>spx</sub>(P<sub>M1</sub>*)-spx (kan)</i>                          | From Daniel RT(1)                                                                                                                         |
| HB20830 | <i>yhdK::erm</i>                                                                | All gene:: <i>erm</i> and gene:: <i>kan</i> strains were constructed as using genomic DNA of BKE or BKK strains into recipient strains(2) |
| HB20922 | <i>spx::P<sub>spx</sub>(P<sub>M1</sub>*)-spx (kan) yhdK::erm</i>                |                                                                                                                                           |
| HB21099 | $\Delta P_M\text{-}rodA$                                                        | P <sub>M</sub> promoter of <i>rodA</i> removed using CRISPR                                                                               |
| HB21117 | $\Delta P_M\text{-}rodA \Delta P_M\text{-}murG$                                 | $\Delta P_M\text{-}murG$ transformed with CRISPR plasmid to remove P <sub>M</sub> of <i>rodA</i>                                          |
| HB21118 | $\Delta P_M\text{-}rodA \Delta P_M\text{-}maf$                                  | $\Delta P_M\text{-}maf$ transformed with CRISPR plasmid to remove P <sub>M</sub> of <i>rodA</i>                                           |
| HB21266 | $\Delta P_M\text{-}maf \Delta P_M\text{-}murG \Delta P_M\text{-}rodA$           | P <sub>M</sub> promoter of <i>rodA</i> removed using CRISPR from $\Delta P_M\text{-}maf \Delta P_M\text{-}murG$ background                |
| HB25433 | $\Delta P_M\text{-}maf yhdK::erm$                                               |                                                                                                                                           |
| HB25434 | $\Delta P_M\text{-}murG yhdK::erm$                                              |                                                                                                                                           |
| HB25435 | $\Delta P_M\text{-}rodA yhdK::erm$                                              |                                                                                                                                           |
| HB25436 | $\Delta P_M\text{-}murG \Delta P_M\text{-}maf yhdK::erm$                        |                                                                                                                                           |
| HB25437 | $\Delta P_M\text{-}rodA \Delta P_M\text{-}maf yhdK::erm$                        |                                                                                                                                           |
| HB25438 | $\Delta P_M\text{-}rodA \Delta P_M\text{-}murG yhdK::erm$                       |                                                                                                                                           |
| HB25439 | $\Delta P_M\text{-}maf \Delta P_M\text{-}murG \Delta P_M\text{-}rodA yhdK::erm$ |                                                                                                                                           |
| HB21248 | PY79 P <sub>M</sub> - <i>lacZ yhdL::kan</i>                                     | PY79 background, <i>yhdL</i> is not essential in PY79 background                                                                          |
| HB21258 | 168 P <sub>M</sub> - <i>lacZ yhdL::kan</i> congression from PY79-1              |                                                                                                                                           |
| HB21259 | 168 P <sub>M</sub> - <i>lacZ yhdL::kan</i> congression from PY79-2              |                                                                                                                                           |
| HB21260 | 168 P <sub>M</sub> - <i>lacZ yhdL::kan</i> congression from PY79-3              |                                                                                                                                           |
| HB21261 | 168 P <sub>M</sub> - <i>lacZ yhdL::kan</i> congression from PY79-4              |                                                                                                                                           |
| HB21262 | 168 P <sub>M</sub> - <i>lacZ yhdL::kan</i> congression from PY79-5              |                                                                                                                                           |
| HB21263 | 168 P <sub>M</sub> - <i>lacZ yhdL::kan</i> congression from PY79-6              |                                                                                                                                           |
| HB21264 | 168 P <sub>M</sub> - <i>lacZ yhdL::kan</i> congression from PY79-7              |                                                                                                                                           |
| HB21265 | 168 P <sub>M</sub> - <i>lacZ yhdL::kan</i> congression from PY79-8              | Not included in Figure S1, as this strain contains too many SNPs from PY79, possible endospore contamination from PY79 genomic DNA prep   |
| HB21250 | 168 P <sub>M</sub> - <i>lacZ yhdL::kan</i> congression from PY79-9              |                                                                                                                                           |
| HB21251 | 168 P <sub>M</sub> - <i>lacZ yhdL::kan</i> congression from PY79-10             |                                                                                                                                           |



HB21252 168 P<sub>M</sub>-lacZ yhdL::kan congression from PY79-11  
 HB21253 168 P<sub>M</sub>-lacZ yhdL::kan congression from PY79-12  
 HB21254 168 P<sub>M</sub>-lacZ yhdL::kan congression from PY79-13  
 HB21255 168 P<sub>M</sub>-lacZ yhdL::kan congression from PY79-14  
 HB21256 168 P<sub>M</sub>-lacZ yhdL::kan congression from PY79-15  
 HB21257 168 P<sub>M</sub>-lacZ yhdL::kan congression from PY79-16  
 HB22728 *spoIIIJ*  
 HB22789 P<sub>M</sub>-lacZ SpoIIIJ<sup>Q140K</sup> yhdL::kan  
 HB22848 SpoIIIJ<sup>Q140K</sup> yhdK::erm  
 HB22849 PY79 P<sub>M</sub>-lacZ SpoIIIJ<sup>K140Q</sup> yhdK::erm  
 HB22850 PY79 P<sub>M</sub>-lacZ *spoIIIJ* yhdK::erm  
 HB22883 PY79 yhdK::erm  
 HB22925 PY79 P<sub>M</sub>-lacZ SpoIIIJ<sup>K140Q</sup>  
 HB22926 PY79 P<sub>M</sub>-lacZ *spoIIIJ*  
 HB22966 SpoIIIJ<sup>Q140K</sup>  
 HB23553 *amyE*::P<sub>spac(hy)</sub>-*spoIIIJ*  
 HB23556 *amyE*::P<sub>spac(hy)</sub>-*yidC2*  
 HB23558 *amyE*::P<sub>spac(hy)</sub>-*E.coli-yidC*  
 HB23595 *amyE*::P<sub>spac(hy)</sub>-*E.coli-YidC*<sup>Q429K</sup>  
 HB25405 *amyE*::P<sub>spac(hy)</sub>-*spoIIIJ* yhdK::erm  
 HB25406 *amyE*::P<sub>spac(hy)</sub>-*yidC2* yhdK::erm  
 HB25407 *amyE*::P<sub>spac(hy)</sub>-*E.coli-yidC* yhdK::erm  
 HB25408 *amyE*::P<sub>spac(hy)</sub>-*E.coli-YidC*<sup>Q429K</sup> yhdK::erm  
 HB23605 *thrC*::P<sub>M</sub>-*spoVG-lacZ-spec* *ganA*::P<sub>xyIA</sub>-*yhdL* *amyE*::*spoIIIJ* yhdL::kan  
 HB23606 *thrC*::P<sub>M</sub>-*spoVG-lacZ-spec* *ganA*::P<sub>xyIA</sub>-*yhdL* *amyE*::*spoIIIJ-jag* yhdL::kan  
 HB23607 *thrC*::P<sub>M</sub>-*spoVG-lacZ-spec* *ganA*::P<sub>xyIA</sub>-*yhdL* *amyE*::*yidC2* yhdL::kan  
 HB23608 *thrC*::P<sub>M</sub>-*spoVG-lacZ-spec* *ganA*::P<sub>xyIA</sub>-*yhdL* *amyE*::*E.coli-yidC* yhdL::kan  
 HB23609 *thrC*::P<sub>M</sub>-*spoVG-lacZ-spec* *ganA*::P<sub>xyIA</sub>-*yhdL* *amyE*::*E.coli-YidC*<sup>Q429K</sup> yhdL::kan  
 HB23610 SpoIIIJ<sup>R73A</sup> *ganA*::P<sub>xyIA</sub>-*yidC2* *yidC2*::kan  
 HB23611 SpoIIIJ<sup>R73AQ140K</sup> *ganA*::P<sub>xyIA</sub>-*yidC2* *yidC2*::kan  
 HB23698 SpoIIIJ<sup>R73AQ140K</sup> *ganA*::P<sub>xyIA</sub>-*yhdL-cat* yhdL::kan

*spoIIIJ* was mutated at its native locus using CRISPR  
*amyE*::P<sub>spac(hy)</sub> constructs were made using plasmid pPL82

*ganA*::P<sub>xyIA</sub>-*yhdL* was constructed using pAX01, *thrC*::P<sub>M</sub>-*spoVG-lacZ* reporter was constructed using pDG1663, with the *Erm*<sup>R</sup> cassette replaced by a *Spec*<sup>R</sup> cassette using LFH PCR

*ganA*::P<sub>xyIA</sub>-*yidC2* was constructed using pAX01

*ganA*::P<sub>xyIA</sub>-*yhdL-cat* was constructed using pAX01, and the original *Erm*<sup>R</sup> cassette in pAX01 was replaced by a *CM*<sup>R</sup> cassette using LFH PCR

|         |                                                                                                                                                                  |                                                                                                             |
|---------|------------------------------------------------------------------------------------------------------------------------------------------------------------------|-------------------------------------------------------------------------------------------------------------|
| HB23719 | <i>SpoIIIJ</i> <sup>Q140K</sup> <i>ganA</i> ::P <sub>xyIA</sub> - <i>yhdL</i> -cat <i>yhdL</i> :: <i>Kan</i>                                                     |                                                                                                             |
| HB23902 | <i>amyE</i> ::P <sub>spac(hy)</sub> - <i>YidC2</i> <sup>Q148K</sup>                                                                                              |                                                                                                             |
| HB25409 | <i>amyE</i> ::P <sub>spac(hy)</sub> - <i>YidC2</i> <sup>Q148K</sup> <i>yhdK</i> :: <i>erm</i>                                                                    |                                                                                                             |
| HB23917 | <i>yidC2</i> '-lacZ                                                                                                                                              | Genomic DNA of SCB751 transformed into 168(3)                                                               |
| HB23918 | <i>yidC2</i> '-lacZ <i>spoIIIJ</i>                                                                                                                               | Genomic DNA of SCB751 transformed into HB22728(3)                                                           |
| HB23935 | <i>yidC2</i> '-lacZ <i>spoIIIJ thrC</i> :: <i>spoIIIJ</i> -spec                                                                                                  |                                                                                                             |
| HB23953 | <i>ganA</i> ::P <sub>xyIA</sub> - <i>yhdL</i> P <sub>M</sub> -lacZ <i>yhdL</i> :: <i>kan</i>                                                                     |                                                                                                             |
| HB23955 | <i>yidC2 ganA</i> ::P <sub>xyIA</sub> - <i>yidC2 spoIIIJ</i> :: <i>kan</i>                                                                                       |                                                                                                             |
| HB23965 | <i>thrC</i> :: <i>spoIIIJ</i> -spec                                                                                                                              | <i>thrC</i> :: <i>spoIIIJ</i> -spec WT allele was constructed using LFH PCR                                 |
| HB23966 | P <sub>M</sub> -lacZ <i>thrC</i> :: <i>spoIIIJ</i> -spec                                                                                                         |                                                                                                             |
| HB23967 | <i>spoIIIJ P<sub>M</sub>-lacZ thrC</i> :: <i>spoIIIJ</i> -spec                                                                                                   |                                                                                                             |
| HB23968 | <i>yidC2 P<sub>xyIA</sub>-yidC2 spoIIIJ</i> :: <i>kan thrC</i> :: <i>spoIIIJ</i> -spec                                                                           |                                                                                                             |
| HB23969 | <i>thrC</i> :: <i>SpoIIIJ</i> <sup>Q140K</sup> -spec ΔP <sub>M</sub> - <i>maf</i>                                                                                |                                                                                                             |
| HB23970 | <i>thrC</i> :: <i>SpoIIIJ</i> <sup>Q140K</sup> -spec ΔP <sub>M</sub> - <i>murG</i>                                                                               |                                                                                                             |
| HB23971 | <i>thrC</i> :: <i>SpoIIIJ</i> <sup>Q140K</sup> -spec ΔP <sub>M</sub> - <i>rodA</i>                                                                               |                                                                                                             |
| HB23972 | <i>thrC</i> :: <i>SpoIIIJ</i> <sup>Q140K</sup> -spec ΔP <sub>M</sub> - <i>maf</i> ΔP <sub>M</sub> - <i>murG</i>                                                  |                                                                                                             |
| HB23973 | <i>thrC</i> :: <i>SpoIIIJ</i> <sup>Q140K</sup> -spec ΔP <sub>M</sub> - <i>maf</i> ΔP <sub>M</sub> - <i>rodA</i>                                                  |                                                                                                             |
| HB23974 | <i>thrC</i> :: <i>SpoIIIJ</i> <sup>Q140K</sup> -spec ΔP <sub>M</sub> - <i>murG</i> ΔP <sub>M</sub> - <i>rodA</i>                                                 |                                                                                                             |
| HB23975 | <i>thrC</i> :: <i>SpoIIIJ</i> <sup>Q140K</sup> -spec ΔP <sub>M</sub> - <i>maf</i> ΔP <sub>M</sub> - <i>murG</i> ΔP <sub>M</sub> - <i>rodA</i>                    |                                                                                                             |
| HB25440 | <i>thrC</i> :: <i>SpoIIIJ</i> <sup>Q140K</sup> -spec ΔP <sub>M</sub> - <i>maf yhdK</i> :: <i>erm</i>                                                             |                                                                                                             |
| HB25441 | <i>thrC</i> :: <i>SpoIIIJ</i> <sup>Q140K</sup> -spec ΔP <sub>M</sub> - <i>murG yhdK</i> :: <i>erm</i>                                                            |                                                                                                             |
| HB25442 | <i>thrC</i> :: <i>SpoIIIJ</i> <sup>Q140K</sup> -spec ΔP <sub>M</sub> - <i>rodA yhdK</i> :: <i>erm</i>                                                            |                                                                                                             |
| HB25443 | <i>thrC</i> :: <i>SpoIIIJ</i> <sup>Q140K</sup> -spec ΔP <sub>M</sub> - <i>maf</i> ΔP <sub>M</sub> - <i>murG yhdK</i> :: <i>erm</i>                               |                                                                                                             |
| HB25444 | <i>thrC</i> :: <i>SpoIIIJ</i> <sup>Q140K</sup> -spec ΔP <sub>M</sub> - <i>maf</i> ΔP <sub>M</sub> - <i>rodA yhdK</i> :: <i>erm</i>                               |                                                                                                             |
| HB25445 | <i>thrC</i> :: <i>SpoIIIJ</i> <sup>Q140K</sup> -spec ΔP <sub>M</sub> - <i>murG</i> ΔP <sub>M</sub> - <i>rodA yhdK</i> :: <i>erm</i>                              |                                                                                                             |
| HB25446 | <i>thrC</i> :: <i>SpoIIIJ</i> <sup>Q140K</sup> -spec ΔP <sub>M</sub> - <i>maf</i> ΔP <sub>M</sub> - <i>murG</i> ΔP <sub>M</sub> - <i>rodA yhdK</i> :: <i>erm</i> |                                                                                                             |
| HB23976 | <i>thrC</i> :: <i>spoIIIJ</i> -spec WT (R73)                                                                                                                     |                                                                                                             |
| HB23977 | P <sub>M</sub> -lacZ <i>thrC</i> :: <i>spoIIIJ</i> -spec WT (R73)                                                                                                |                                                                                                             |
| HB23978 | <i>spoIIIJ P<sub>M</sub>-lacZ thrC</i> :: <i>spoIIIJ</i> -spec WT (R73)                                                                                          |                                                                                                             |
| HB25354 | <i>spoIIIJ P<sub>M</sub>-lacZ thrC</i> :: <i>spoIIIJ</i> -spec sup (R144R231)                                                                                    | <i>thrC</i> :: <i>spoIIIJ</i> -spec allele variants were constructed using degenerative primers and LFH PCR |
| HB25355 | <i>spoIIIJ P<sub>M</sub>-lacZ thrC</i> :: <i>spoIIIJ</i> -spec sup (R72K140)                                                                                     |                                                                                                             |
| HB25356 | <i>spoIIIJ P<sub>M</sub>-lacZ thrC</i> :: <i>spoIIIJ</i> -spec sup (R73R228)                                                                                     |                                                                                                             |

HB25357 *spoIIIJ P<sub>M</sub>-lacZ thrC::spoIIIJ-spec sup* (K140R231)  
HB25358 *spoIIIJ P<sub>M</sub>-lacZ thrC::spoIIIJ-spec sup* (R76R144)  
HB25359 *spoIIIJ P<sub>M</sub>-lacZ thrC::spoIIIJ-spec sup* (R73R144)  
HB25360 *spoIIIJ P<sub>M</sub>-lacZ thrC::spoIIIJ-spec sup* (R73R231)  
HB25361 *spoIIIJ P<sub>M</sub>-lacZ thrC::spoIIIJ-spec sup* (K140R228)  
HB25362 *spoIIIJ P<sub>M</sub>-lacZ thrC::spoIIIJ-spec sup* (R228R231)  
HB25363 *spoIIIJ P<sub>M</sub>-lacZ thrC::spoIIIJ-spec sup* (R72R144)  
HB25364 *spoIIIJ P<sub>M</sub>-lacZ thrC::spoIIIJ-spec sup* (K140R144R231)  
HB25366 *spoIIIJ P<sub>M</sub>-lacZ thrC::spoIIIJ-spec sup* (R73K140R144)  
HB25376 *yhdK::erm spoIIIJ P<sub>M</sub>-lacZ thrC::spoIIIJ-spec sup* (R144R231)  
HB25377 *yhdK::erm spoIIIJ P<sub>M</sub>-lacZ thrC::spoIIIJ-spec sup* (R72K140)  
HB25378 *yhdK::erm spoIIIJ P<sub>M</sub>-lacZ thrC::spoIIIJ-spec sup* (R73R228)  
HB25379 *yhdK::erm spoIIIJ P<sub>M</sub>-lacZ thrC::spoIIIJ-spec sup* (K140R231)  
HB25380 *yhdK::erm spoIIIJ P<sub>M</sub>-lacZ thrC::spoIIIJ-spec sup* (R76R144)  
HB25381 *yhdK::erm spoIIIJ P<sub>M</sub>-lacZ thrC::spoIIIJ-spec sup* (R73R144)  
HB25382 *yhdK::erm spoIIIJ P<sub>M</sub>-lacZ thrC::spoIIIJ-spec sup* (R73R231)  
HB25383 *yhdK::erm spoIIIJ P<sub>M</sub>-lacZ thrC::spoIIIJ-spec sup* (K140R228)  
HB25384 *yhdK::erm spoIIIJ P<sub>M</sub>-lacZ thrC::spoIIIJ-spec sup* (R228R231)  
HB25385 *yhdK::erm spoIIIJ P<sub>M</sub>-lacZ thrC::spoIIIJ-spec sup* (R72R144)  
HB25386 *yhdK::erm spoIIIJ P<sub>M</sub>-lacZ thrC::spoIIIJ-spec sup* (K140R144R231)  
HB25387 *yhdK::erm spoIIIJ P<sub>M</sub>-lacZ thrC::spoIIIJ-spec sup* (R73K140R144)  
HB23987 *spoIIIJ P<sub>M</sub>-lacZ thrC::spoIIIJ-spec sup* (R73K140)  
HB23988 *spoIIIJ P<sub>M</sub>-lacZ thrC::spoIIIJ-spec sup* (R76R228)  
HB23989 *spoIIIJ P<sub>M</sub>-lacZ thrC::spoIIIJ-spec sup* (K140R144)  
HB23990 *spoIIIJ P<sub>M</sub>-lacZ thrC::spoIIIJ-spec sup* (R72K140R144)  
HB23991 *spoIIIJ P<sub>M</sub>-lacZ thrC::spoIIIJ-spec sup* (R76K140R228)  
HB25388 *yhdK::erm spoIIIJ P<sub>M</sub>-lacZ thrC::spoIIIJ-spec sup* (R73K140)  
HB25389 *yhdK::erm spoIIIJ P<sub>M</sub>-lacZ thrC::spoIIIJ-spec sup* (R76R228)  
HB25390 *yhdK::erm spoIIIJ P<sub>M</sub>-lacZ thrC::spoIIIJ-spec sup* (K140R144)  
HB25391 *yhdK::erm spoIIIJ P<sub>M</sub>-lacZ thrC::spoIIIJ-spec sup* (R72K140R144)  
HB25392 *yhdK::erm spoIIIJ P<sub>M</sub>-lacZ thrC::spoIIIJ-spec sup* (R76K140R228)  
HB25404 *yhdK::erm spoIIIJ P<sub>M</sub>-lacZ thrC::spoIIIJ-spec WT* (R73)

HB25107 *P<sub>M</sub>-lacZ ganaA::P<sub>xyIA</sub>-yhdL yhdL::kan spoIIJ thrC::spoIIJ sup* (R144R231)  
HB25108 *P<sub>M</sub>-lacZ ganaA::P<sub>xyIA</sub>-yhdL yhdL::kan spoIIJ thrC::spoIIJ sup* (R72K140)  
HB25109 *P<sub>M</sub>-lacZ ganaA::P<sub>xyIA</sub>-yhdL yhdL::kan spoIIJ thrC::spoIIJ sup* (R73K140)  
HB25110 *P<sub>M</sub>-lacZ ganaA::P<sub>xyIA</sub>-yhdL yhdL::kan spoIIJ thrC::spoIIJ sup* (R73R228)  
HB25111 *P<sub>M</sub>-lacZ ganaA::P<sub>xyIA</sub>-yhdL yhdL::kan spoIIJ thrC::spoIIJ sup* (R76R228)  
HB25112 *P<sub>M</sub>-lacZ ganaA::P<sub>xyIA</sub>-yhdL yhdL::kan spoIIJ thrC::spoIIJ sup* (K140R231)  
HB25113 *P<sub>M</sub>-lacZ ganaA::P<sub>xyIA</sub>-yhdL yhdL::kan spoIIJ thrC::spoIIJ sup* (R76R144)  
HB25114 *P<sub>M</sub>-lacZ ganaA::P<sub>xyIA</sub>-yhdL yhdL::kan spoIIJ thrC::spoIIJ sup* (K140R144)  
HB25115 *P<sub>M</sub>-lacZ ganaA::P<sub>xyIA</sub>-yhdL yhdL::kan spoIIJ thrC::spoIIJ sup* (R73R144)  
HB25116 *P<sub>M</sub>-lacZ ganaA::P<sub>xyIA</sub>-yhdL yhdL::kan spoIIJ thrC::spoIIJ sup* (R73R231)  
HB25117 *P<sub>M</sub>-lacZ ganaA::P<sub>xyIA</sub>-yhdL yhdL::kan spoIIJ thrC::spoIIJ sup* (K140R228)  
HB25118 *P<sub>M</sub>-lacZ ganaA::P<sub>xyIA</sub>-yhdL yhdL::kan spoIIJ thrC::spoIIJ sup* (R228R231)  
HB25119 *P<sub>M</sub>-lacZ ganaA::P<sub>xyIA</sub>-yhdL yhdL::kan spoIIJ thrC::spoIIJ sup* (R72R144)  
HB25120 *P<sub>M</sub>-lacZ ganaA::P<sub>xyIA</sub>-yhdL yhdL::kan spoIIJ thrC::spoIIJ sup* (R72K140R144)  
HB25121 *P<sub>M</sub>-lacZ ganaA::P<sub>xyIA</sub>-yhdL yhdL::kan spoIIJ thrC::spoIIJ sup* (R76K140R228)  
HB25122 *P<sub>M</sub>-lacZ ganaA::P<sub>xyIA</sub>-yhdL yhdL::kan spoIIJ thrC::spoIIJ sup* (K140R144R231)  
HB25123 *P<sub>M</sub>-lacZ ganaA::P<sub>xyIA</sub>-yhdL yhdL::kan spoIIJ thrC::spoIIJ sup* (R73K140R228)  
HB25124 *P<sub>M</sub>-lacZ ganaA::P<sub>xyIA</sub>-yhdL yhdL::kan spoIIJ thrC::spoIIJ sup* (R73K140R144)  
HB25227 *yidC2'-lacZ spoIIJ thrC::spoIIJ sup* (R144R231)  
HB25228 *yidC2'-lacZ spoIIJ thrC::spoIIJ sup* (R72K140)  
HB25229 *yidC2'-lacZ spoIIJ thrC::spoIIJ sup* (R73K140)  
HB25230 *yidC2'-lacZ spoIIJ thrC::spoIIJ sup* (R73R228)  
HB25231 *yidC2'-lacZ spoIIJ thrC::spoIIJ sup* (R76R228)  
HB25232 *yidC2'-lacZ spoIIJ thrC::spoIIJ sup* (K140R231)  
HB25233 *yidC2'-lacZ spoIIJ thrC::spoIIJ sup* (R76R144)  
HB25234 *yidC2'-lacZ spoIIJ thrC::spoIIJ sup* (K140R144)  
HB25235 *yidC2'-lacZ spoIIJ thrC::spoIIJ sup* (R73R144)  
HB25236 *yidC2'-lacZ spoIIJ thrC::spoIIJ sup* (R73R231)  
HB25237 *yidC2'-lacZ spoIIJ thrC::spoIIJ sup* (K140R228)  
HB25238 *yidC2'-lacZ spoIIJ thrC::spoIIJ sup* (R228R231)  
HB25239 *yidC2'-lacZ spoIIJ thrC::spoIIJ sup* (R72R144)  
HB25240 *yidC2'-lacZ spoIIJ thrC::spoIIJ sup* (R72K140R144)

HB25241 *yidC2'-lacZ spoIIIJ thrC::spoIIIJ* sup (R76K140R228)  
HB25242 *yidC2'-lacZ spoIIIJ thrC::spoIIIJ* sup (K140R144R231)  
HB25243 *yidC2'-lacZ spoIIIJ thrC::spoIIIJ* sup (R73K140R228)  
HB25244 *yidC2'-lacZ spoIIIJ thrC::spoIIIJ* sup (R73K140R144)  
HB25287 *yidC2 ganA::P<sub>xyIA</sub>-yidC2 spoIIIJ::kan thrC::spoIIIJ* sup (R144R231)  
HB25288 *yidC2 ganA::P<sub>xyIA</sub>-yidC2 spoIIIJ::kan thrC::spoIIIJ* sup (R72K140)  
HB25289 *yidC2 ganA::P<sub>xyIA</sub>-yidC2 spoIIIJ::kan thrC::spoIIIJ* sup (R73K140)  
HB25290 *yidC2 ganA::P<sub>xyIA</sub>-yidC2 spoIIIJ::kan thrC::spoIIIJ* sup (R73R228)  
HB25291 *yidC2 ganA::P<sub>xyIA</sub>-yidC2 spoIIIJ::kan thrC::spoIIIJ* sup (R76R228)  
HB25292 *yidC2 ganA::P<sub>xyIA</sub>-yidC2 spoIIIJ::kan thrC::spoIIIJ* sup (K140R231)  
HB25293 *yidC2 ganA::P<sub>xyIA</sub>-yidC2 spoIIIJ::kan thrC::spoIIIJ* sup (R76R144)  
HB25294 *yidC2 ganA::P<sub>xyIA</sub>-yidC2 spoIIIJ::kan thrC::spoIIIJ* sup (K140R144)  
HB25295 *yidC2 ganA::P<sub>xyIA</sub>-yidC2 spoIIIJ::kan thrC::spoIIIJ* sup (R73R144)  
HB25296 *yidC2 ganA::P<sub>xyIA</sub>-yidC2 spoIIIJ::kan thrC::spoIIIJ* sup (R73R231)  
HB25297 *yidC2 ganA::P<sub>xyIA</sub>-yidC2 spoIIIJ::kan thrC::spoIIIJ* sup (K140R228)  
HB25298 *yidC2 ganA::P<sub>xyIA</sub>-yidC2 spoIIIJ::kan thrC::spoIIIJ* sup (R228R231)  
HB25299 *yidC2 ganA::P<sub>xyIA</sub>-yidC2 spoIIIJ::kan thrC::spoIIIJ* sup (R72R144)  
HB25300 *yidC2 ganA::P<sub>xyIA</sub>-yidC2 spoIIIJ::kan thrC::spoIIIJ* sup (R72K140R144)  
HB25301 *yidC2 ganA::P<sub>xyIA</sub>-yidC2 spoIIIJ::kan thrC::spoIIIJ* sup (R76K140R228)  
HB25302 *yidC2 ganA::P<sub>xyIA</sub>-yidC2 spoIIIJ::kan thrC::spoIIIJ* sup (K140R144R231)  
HB25303 *yidC2 ganA::P<sub>xyIA</sub>-yidC2 spoIIIJ::kan thrC::spoIIIJ* sup (R73K140R228)  
HB25304 *yidC2 ganA::P<sub>xyIA</sub>-yidC2 spoIIIJ::kan thrC::spoIIIJ* sup (R73K140R144)  
HB23636 *htrA::kan*  
HB23637 *htrB::kan*  
HB23638 *glpG::kan*  
HB23639 *sipS::kan*  
HB23640 *sipT::kan*  
HB23641 *htpX::kan*  
HB23648 *htrAB*  
HB23650 *P<sub>htrA</sub>-lux*  
HB23651 *cssR*  
HB23653 *cssS*

|         |                                              |                         |
|---------|----------------------------------------------|-------------------------|
| HB23657 | $P_{htrA}$ -lux spoIIIJ <sup>Q140K</sup>     |                         |
| HB23660 | <i>amyE</i> :: $P_{spac(hy)}$ -none          | pPL82 empty vector      |
| HB23663 | <i>amyE</i> :: $P_{spac(hy)}$ - <i>htrA</i>  | constructed using pPL82 |
| HB23664 | <i>amyE</i> :: $P_{spac(hy)}$ - <i>htrB</i>  | constructed using pPL82 |
| HB23667 | $P_{htrA}$ -lux <i>cssR</i> :: <i>kan</i>    |                         |
| HB23668 | $P_{htrA}$ -lux <i>cssS</i> :: <i>kan</i>    |                         |
| HB23682 | <i>prsW</i> :: <i>kan</i>                    |                         |
| HB23690 | <i>cssS htrB</i>                             |                         |
| HB23910 | <i>secDF</i>                                 |                         |
| HB23926 | <i>sasA</i>                                  |                         |
| HB23806 | <i>bshC</i>                                  |                         |
| HB23807 | <i>msrA</i>                                  |                         |
| HB23808 | <i>nfrA</i>                                  |                         |
| HB23809 | <i>tpx</i>                                   |                         |
| HB23811 | <i>bshA</i>                                  |                         |
| HB25410 | <i>htrA</i> :: <i>kan yhdK</i> :: <i>erm</i> |                         |
| HB25411 | <i>htrB</i> :: <i>kan yhdK</i> :: <i>erm</i> |                         |
| HB25412 | <i>glpG</i> :: <i>kan yhdK</i> :: <i>erm</i> |                         |
| HB25413 | <i>sipS</i> :: <i>kan yhdK</i> :: <i>erm</i> |                         |
| HB25414 | <i>sipT</i> :: <i>kan yhdK</i> :: <i>erm</i> |                         |
| HB25415 | <i>htpX</i> :: <i>kan yhdK</i> :: <i>erm</i> |                         |
| HB25416 | <i>htrAB yhdK</i> :: <i>erm</i>              |                         |
| HB25417 | <i>cssR yhdK</i> :: <i>erm</i>               |                         |
| HB25418 | <i>cssS yhdK</i> :: <i>erm</i>               |                         |
| HB25419 | <i>prsW</i> :: <i>kan yhdK</i> :: <i>erm</i> |                         |
| HB25420 | <i>cssS htrB yhdK</i> :: <i>erm</i>          |                         |
| HB25421 | <i>secDF yhdK</i> :: <i>erm</i>              |                         |
| HB25422 | <i>sasA yhdK</i> :: <i>erm</i>               |                         |
| HB25423 | <i>bshC yhdK</i> :: <i>erm</i>               |                         |
| HB25424 | <i>msrA yhdK</i> :: <i>erm</i>               |                         |
| HB25425 | <i>nfrA yhdK</i> :: <i>erm</i>               |                         |
| HB25426 | <i>tpx yhdK</i> :: <i>erm</i>                |                         |

|         |                                                               |
|---------|---------------------------------------------------------------|
| HB25427 | <i>bshA yhdK::erm</i>                                         |
| HB25428 | <i>amyE::P<sub>spac(hy)</sub>-none yhdK::erm</i>              |
| HB25429 | <i>amyE::P<sub>spac(hy)</sub>-htrA yhdK::erm</i>              |
| HB25430 | <i>amyE::P<sub>spac(hy)</sub>-htrB yhdK::erm</i>              |
| HB25431 | <i>P<sub>htrA</sub>-lux yhdK::erm</i>                         |
| HB25432 | <i>P<sub>htrA</sub>-lux spoIIIJ<sup>Q140K</sup> yhdK::erm</i> |

**Table S6. Primers used in this study**

| Number | Name                | Sequence                                              |
|--------|---------------------|-------------------------------------------------------|
| 1295   | kan-F               | CAGCGAACCATTTGAGGTGATAGG                              |
| 1296   | kan-R               | CGATACAAATTCCTCGTAGGCGCTCG                            |
| 6580   | sigM-F-NotI         | ATCGGCGGCCGCGCACTATCTTTTGC GGCCAT                     |
| 6581   | sigM-R-HindIII      | ATCGAAGCTTTGGTCGCTCATTTCCCCATT                        |
| 6582   | yhdL-up-F           | GCCGTTTTCGTTGCGAGAAT                                  |
| 6583   | yhdL-up-R           | CGCCGACATTCGCTGATTTTTCTGGTCGCTCATTTCCC                |
| 6584   | yhdL-mid-F          | GGGAAATGAGCGACCAGGAAAAATCAGCGAATGTCCGGCG              |
| 6585   | yhdL-mid-R          | CCTATCACCTCAAATGGTTCGCTGTCCGAAAACCGGTATAACGAAA        |
| 6586   | yhdL-down-F         | CGAGCGCCTACGAGGAATTTGTATCGAGATACGAATTTACAGTTTGGCT     |
| 6587   | yhdL-down-R         | ACGAATCGGGCAATCATGTG                                  |
| 6588   | chr-sigM-seq-F      | CCATTGTGCCACTCCTTCAC                                  |
| 6589   | chr-sigM-seq-R      | TGCAGTCATTTCTGGTCGC                                   |
| 6590   | pAX01-check-F       | GGGGGAAATGACAAATGGTCC                                 |
| 6591   | pAX01-check-R       | ACGAAAGGGCCTCGTGATAC                                  |
| 6599   | Pxyl-yhdL-F-BamHI   | ATCGGGATCCTAGAGGGGAGAAAAGGCAATGATGAATGAAGAATTTAAAAAGC |
| 6600   | Pxyl-yhdL-R-SacII   | ATCGCCGCGGTCCAGCCGAATACATTGTG                         |
| 6693   | pAX01-erm-cm-up-F   | GCCGCACTCTTCCTTTTTTCAA                                |
| 6694   | pAX01-erm-cm-up-R   | CTTGATAATAAGGGTAACTATTGCCTTTGGTTGAGTACTTTTTCACTCG     |
| 6695   | pAX01-erm-cm-down-F | GGGTAAGTACCTCGCCGGTCCACGCTGGGGGAGGAAATAATCTATGAGTCGC  |
| 6696   | pAX01-erm-cm-down-R | TCGGCATTTTTGCATGGAGC                                  |

|      |                            |                                                          |
|------|----------------------------|----------------------------------------------------------|
| 6759 | yhdL-check-F               | ACGCTGGGAAGCTACCTCTA                                     |
| 6760 | yhdL-check-R               | TCTGCTTTTGCGGTCGTTTG                                     |
| 6808 | PsigM-F-EcoRI              | AGCTGAATTCGCCGTTTGCATGTAATGTG                            |
| 6809 | PsigM-R-PstI               | AGCTCTGCAGCAGTAAGTCTTCAGCAAGATGC                         |
| 6814 | pBs1ClacZ(lux)-check-F     | AAAGGATTTGAGCGTAGCGA                                     |
| 6815 | pBs1ClacZ-check-R          | TTGGGTAACGCCAGGGTTTT                                     |
| 6816 | pBs3Clux-check-R           | GAGAGTCCTCCTGTTCGACCT                                    |
| 6861 | cssS-check-F               | CCGCGAGGTCTATGACGAAA                                     |
| 6862 | cssS-check-R               | AGCTCAAGCGAAAGGGTGAA                                     |
| 7348 | pJOE8999-check-F           | CCTTTTTGCGTGTGATGCGA                                     |
| 7349 | pJOE8999-check-R           | GTCAGCTAGGAGGTGACTGA                                     |
| 7426 | Delta-Pam-rodA-up-F        | AAGGCCAACGAGGCCTCTGCTGAACACAGTCACTT                      |
| 7427 | Delta-Pm-rodA-up-R         | CGCTTTTTTCAGCTACACGAAATGCGATAATGTGTTATGTTCCC             |
| 7428 | Delta-Pm-rodA-down-F       | GGGAACATAACACATTATCGCATTTCGTGTAGCTGAAAAAGCG              |
| 7429 | Delta-Pm-rodA-down-R       | AAGGCCTTATTGGCCCTCATTTGAAGCAGACACCC                      |
| 7430 | ProdA-deltaPm-gRNA-F       | TACGCGTTTTTTAACAAATTCTAT                                 |
| 7431 | ProdA-deltaPm-gRNA-R       | AAACATAGAATTTGTAAAAAACG                                  |
| 7815 | spoIIIJ-seq-F              | ACGGGAGATAACTACGGGCT                                     |
| 7816 | spoIIIJ-seq-R              | GCTTCATCGACATTTTCGCCC                                    |
| 7866 | spoIIIJ-gRNA-F             | TACGATCCAATTAATAATCGGCATC                                |
| 7867 | spoIIIJ-gRNA-R             | AAACGATGCCGATTTTAATTGGAT                                 |
| 7868 | spoIIIJ-up-F               | AAGGCCAACGAGGCCTATTGCCAGAAAACCGGCGA                      |
| 7869 | spoIIIJ-up-R               | TCGCATGATAGAATCCAATTAAGATAGGCATCTTGATCAAAATCGGGAAACATCCC |
| 7870 | spoIIIJ-down-F             | GGGATGTTTCCCGATTTTGATCAAGATGCCTATCTTAATTGGATTCTATCATGCGA |
| 7871 | spoIIIJ-down-R             | AAGGCCTTATTGGCCATCAGACTTCCC GGCAATGG                     |
| 8120 | yidC2-check-F              | TCCTGCTCTAACGGCAATCG                                     |
| 8121 | yidC2-check-R              | CTTTTTGCACGGGGTTGCTT                                     |
| 8246 | spoIIIJ-PY79-to-168-down-F | CATTGGCGGGATGTTTCCCGATCTTGATCCAGATGCCGATTTTAATTGGA       |
| 8247 | spoIIIJ-PY79-to-168-up-R   | AAAATCGGCATCTGGATCAAGATCGGGAAACATCCCCGCAATG              |
| 8248 | spoIIIJ-PY79-to-168-gRNA-F | TACGATCGGCATCTTGATCAAAAT                                 |
| 8249 | spoIIIJ-PY79-to-168-gRNA-R | AAACATTTTGATCAAGATGCCGAT                                 |
| 8250 | jag-check-F                | TGCGATCATGAGAACCCAGG                                     |



|      |                            |                                                                    |
|------|----------------------------|--------------------------------------------------------------------|
| 8251 | jag-check-R                | AGTTTGGTTCGAAGTGGAAGA                                              |
| 8264 | PsigM-F-HindIII            | ATCGAAGCTTGCCGTTTGCATGTAATGTG                                      |
| 8265 | PsigM-R-BamHI              | ATCGGGATCCCAGTAAGTCTTCAGCAAGATGC                                   |
| 8266 | pDG1663-check-F            | CCAACATGACGAATCCCTCC                                               |
| 8267 | pDG1663-check-R            | TAAGTTGGGTAACGCCAGGG                                               |
| 8276 | YidC2-SpeI-F               | ATCGACTAGTACCGCATTTATAAAAAAGGAGGAGAA                               |
| 8277 | YidC2-BamHI-R              | ATCGGGATCCTCAGCCATGATAAAACAAGACT                                   |
| 8278 | spoIIIJ-R73A-gRNA-F        | TACGAATTAATAAACGAATTAATA                                           |
| 8279 | spoIIIJ-R73A-gRNA-R        | AAACTTTTAATTTCGTTTATTAATT                                          |
| 8280 | SpoIIIJ-R73A-repair-up-R   | GCTGCTTAATCATCAGCGGTAAAATTAATAATGCAATTAATAATGGTAACTAGATAAATTGAAAGC |
| 8281 | SpoIIIJ-R73A-repair-down-F | GCTTTCAATTATTCTAGTTACCATTTTAATTGCATTATTAATTTTACCGCTGATGATTAAGCAGC  |
| 8282 | spoIIIJ-SpeI-F             | ATCGACTAGTAGATTAATTATAGGAGGAAATGTTGT                               |
| 8283 | spoIIIJ-BamHI-R            | ATCGGGATCCAGCAGTCACATTCCTCACTTTT                                   |
| 8341 | Ec-YidC-seq-F              | CCACGCCTGACGAGAAGTAT                                               |
| 8342 | Ec-YidC-seq-R              | AGTTTGAACAGCGGCTGAGA                                               |
| 8343 | Ec-YidC-HindIII-F          | ATCGAAGCTTTAAGGAGGACTAACGATGGATTCGCAACGCA                          |
| 8344 | Ec-YidC-XbaI-R             | ATCGTCTAGAAGCGAAAACCTACCGAATCAGGA                                  |
| 8345 | YidC2-HindIII-F            | ATCGAAGCTTACCGCATTTATAAAAAAGGAGGAGAA                               |
| 8346 | YidC2-XbaI-R               | ATCGTCTAGATCAGCCATGATAAAACAAGACT                                   |
| 8347 | spoIIIJ-XmaI-F             | ATCGCCCCGGGAGATTAATTATAGGAGGAAATGTTGT                              |
| 8348 | SpoIIIJ-XbaI-R             | ATCGTCTAGAAGCAGTCACATTCCTCACTTTT                                   |
| 8349 | jag-XbaI-R                 | ATCGTCTAGAAGTTTGGTTCGAAGTGGAAGA                                    |
| 8352 | pDG1663-up-F               | TTGGGTAACGCCAGGGTTTT                                               |
| 8353 | pDG1663-spec-up-R          | CGTTACGTTATTAGCGAGCCAGTCTGGTTGAGTACTTTTTTCATTCGTT                  |
| 8354 | pDG1663-spec-down-F        | CAATAAACCCCTTGCCCTCGCTACGTCAAGCAATGAAACACGCCA                      |
| 8355 | pDG1663-down-R             | ACCGCTGTGTTCCGGATCTTT                                              |
| 8364 | Ec-YidC-Q429K-up-R         | AGGAAGATTGGCATCTTGATCAGCAGCGGGAAGCA                                |
| 8365 | Ec-YidC-Q429K-down-F       | CTCCCCGCTGCTGATCAAGATGCCAATCTTCCTGGCGT                             |
| 8371 | htrA-check-F               | CTGTTCCATCGACTCAGTCCT                                              |
| 8372 | htrA-check-R               | CGCAGATCATACCCAGTCCC                                               |
| 8373 | htrB-check-F               | AGAGCGAGGAAGATGTAGGA                                               |
| 8374 | htrB-check-R               | TCGGCCTGGCTGAAGAAAAT                                               |

|      |                |                                             |
|------|----------------|---------------------------------------------|
| 8375 | htpX-check-F   | CGCACCATATCGGTTTCGAGA                       |
| 8376 | htpX-check-R   | AACGGCCACAGTAACTGCAA                        |
| 8377 | sipT-check-F   | AGTATCGTGATCGGTGCTGT                        |
| 8378 | sipT-check-R   | AAGCGCGGAAAAGAGAACAAA                       |
| 8379 | sipS-check-F   | AGGCATGATGTGGGTAGAAGA                       |
| 8380 | sipS-check-R   | ACGATGCATAACGGGAATATGT                      |
| 8381 | prsW-check-F   | GGCATATCGCAGCGGAAATC                        |
| 8382 | prsW-check-R   | TTCAAGCCTCCTACTGCAA                         |
| 8383 | cssR-check-F   | TCCTCGCTCTTTTCTCTTCCT                       |
| 8384 | cssR-check-R   | AGGCGGTACTCTGTCAGAAC                        |
| 8385 | cssR-RT-F      | AGGCGAAAGATCCTGACGTG                        |
| 8386 | cssR-RT-R      | CTCACGAGAGTATGGATGCC                        |
| 8389 | cssS-int-F     | TTATCGGGACGATTTGGCCT                        |
| 8390 | cssS-int-R     | CTCTGATGACCATGACCGGC                        |
| 8399 | htrA-HindIII-F | ATCGAAGCTTTAAGGAGGGAACATGATGGATAACTATCGTGA  |
| 8400 | htrA-XmaI-R    | ATCGCCCCGGGTTTACGGCCTGAGGCATTAT             |
| 8401 | htrB-XmaI-F    | ATCGCCCCGGGTAAGGAGGTAAGAACATGGATTATCGACGTGA |
| 8402 | htrB-XbaI-R    | ATCGTCTAGAATGCTTTCCTCTTATTTAGGGTAACA        |
| 8403 | PhtrA-XbaI-F   | ATCGTCTAGATCAACAGCTGTCTAGCGAT               |
| 8404 | PhtrA-PstI-R   | ATCGCTGCAGTCTCTATTTTCACATGTCTATTTATATTGA    |
| 8442 | htrA-int-F     | GCAACAAGCACCTCCTCTGA                        |
| 8443 | htrA-int-R     | GTCCACGCCGCTTACAATTC                        |
| 8444 | htrB-int-F     | ACGAACGCATCAAACATCGC                        |
| 8445 | htrB-int-R     | TGTCAATCATCTGCACGCCT                        |
| 8652 | bshC-check-F   | TGCTGGTTGACGTCATTGGA                        |
| 8653 | bshC-check-R   | TGCTCACCTAGGCCTTCTCT                        |
| 8654 | msrA-check-F   | TGAATTCATTCCGCGACAGC                        |
| 8655 | msrA-check-R   | CCGTGCCGTTATTTTGCCTT                        |
| 8656 | nfrA-check-F   | GTCAGCTATGGGGGAAGCTC                        |
| 8657 | nfrA-check-R   | GTTTCTGCATTGCTGCCCTC                        |
| 8658 | tpx-check-F    | TTGTCCGATCGACAGGCATC                        |
| 8659 | tpx-check-R    | CACCGCACCTACATGGTCTT                        |

|      |                    |                                                               |
|------|--------------------|---------------------------------------------------------------|
| 8676 | cssS-int-F         | TTATCGGGACGATTTGGCCT                                          |
| 8677 | cssS-int-R         | CTCTGATGACCATGACCGGC                                          |
| 8681 | spoIIIJ-spc-2-R    | CTCTTGCCAGTCACGTTACGTTATTAGCTGCAGCAGTCACATTCTCA               |
| 8682 | spoIIIJ-spc-3-F    | TGAGGAATGTGACTGCTGCAGCTAATAACGTAACGTGACTGGCAAGAG              |
| 8686 | spoIIIJ-MUT-2-F    | ATTACCGCTGATGATTAAGCAGCT                                      |
| 8687 | spoIIIJ-MUT-3-F    | TATTGGATTCTATCATGCGATCAT                                      |
| 8688 | spoIIIJ-MUT-4-F    | GTAACCTGTTTATGATTGCGCAAAC                                     |
| 8689 | spoIIIJ-MUT-1-R    | AGCTGCTTAATCATCAGCGGTAATMTAATAATYGTMTTAAAATGGTAACTAGAATAATT   |
| 8690 | spoIIIJ-MUT-2-R    | ATGATCGCATGATAGAATCCAATAMGAATCGGCATTTKGATCAAAAATCGGGAAACATCCC |
| 8691 | spoIIIJ-MUT-3-R    | AGTTTGCGCAATCATAAAACAAGTTACSAACTACCCRATAAAGAGAAAGAGCCCGGGAA   |
| 8700 | dinB-RT-F          | CGGCTGGATTGAAGTGTTTT                                          |
| 8701 | dinB-RT-R          | TGTTTTCATGATTCCGCTTG                                          |
| 8702 | lexA-RT-F          | GTTCCCTCCAGACGAGCATGT                                         |
| 8703 | lexA-RT-R          | CAAGCGAATGTGGGTATCCT                                          |
| 8712 | recA-RT-F          | GTTCCGGCAAAGGTTCCATTA                                         |
| 8713 | recA-RT-R          | GCCAATTCAGTGCTGTAT                                            |
| 8722 | topA-RT-F          | CAGCTGACCCCGACAGAGAA                                          |
| 8723 | topA-RT-R          | ATACGTCTCGCTTGCTGTGC                                          |
| 8726 | gyrA-RT-F          | GGCGGCCATGCGTTATACAG                                          |
| 8727 | gyrA-RT-R          | GCCATACCTACCGCAATGCC                                          |
| 8728 | gyrB-RT-F          | GTGTAGGTGCGTCGGTCGTA                                          |
| 8729 | gyrB-RT-R          | GCTAATTCACGCACGCGGTT                                          |
| 8736 | secG-RT-F          | GTGCCGGATTATCTGGTGCG                                          |
| 8737 | secG-RT-R          | AAGACTGCCAGCACTACCGT                                          |
| 8759 | secDF-check-F      | GAAGAGGGCCAGGAAGCATT                                          |
| 8760 | secDF-check-R      | CATTTGCCTTGCTTCAGCGT                                          |
| 8766 | thrC-up-1-F        | TATGCATCAGGTCGGCTGTC                                          |
| 8767 | thrC-spoIIIJ-1-R   | TAAGAAAGCAGTGGTGATGCCAGGATTGACGCCTTCCGTTT                     |
| 8768 | thrC-spoIIIJ-2-F   | AAACGGAAAGGCGTCAATCCTGGCATCACCCTGCTTTCTTA                     |
| 8769 | spec-thrC-3-R      | GCAAACACGCCTTCTACACGGCAAGGGTTTATTGTTTTCTAAAATCTG              |
| 8770 | spec-thrC-down-4-F | CAGATTTTAGAAAACAATAAACCTTGCCGTGTAGAAGGCGTGTGTTGC              |
| 8771 | thrC-down-4-R      | TTCCCCCTCTCCCAAACCTGA                                         |

|      |                      |                           |
|------|----------------------|---------------------------|
| 8772 | thrC-spoIIIJ-check-F | GATCAAACACCGGCGCTAAC      |
| 8773 | thrC-spoIIIJ-check-R | CAACTCCTGATCCAAACATGTAAGT |
| 8774 | spoIIIJ-MUT-seq-F    | GATAGTCCGCATTTCTGGGA      |
| 8775 | spoIIIJ-MUT-seq-R    | TCTTGCCAGTCACGTTACGT      |

---

1. Rojas-Tapias DF & Helmann JD (2018) Induction of the Spx regulon by cell wall stress reveals novel regulatory mechanisms in *Bacillus subtilis*. *Mol Microbiol* 107(5):659-674.
2. Koo BM, *et al.* (2017) Construction and Analysis of Two Genome-Scale Deletion Libraries for *Bacillus subtilis*. *Cell Syst* 4(3):291-305 e297.
3. Chiba S, Lamsa A, & Pogliano K (2009) A ribosome-nascent chain sensor of membrane protein biogenesis in *Bacillus subtilis*. *EMBO J* 28(22):3461-3475.
